# Supplementary material for: A new view of transcriptome complexity and regulation through the lens of local splicing variations
Source: eLife. 2016 Feb 1;5:e11752. doi: 10.7554/eLife.11752 (PMC4801060; doi:10.7554/eLife.11752)
Supplement: Figure 5—source data 1. — DOI: http://dx.doi.org/10.7554/eLife.11752.012 [file elife-11752-fig5-data1.xlsx]

## Sheet: re-executed
#Comparison	ComplexFoldEnrichment	BinomRawPval	BonferroniCorrected_BinomPval	NumExonicComplexChangingLSVs	NumChangingExonicLSVs	FractionComplexChanging	NumComplexLSVs_quantified	NumExonicLSVs_quantified	BackgroundFreqExonicComplex	SRA_run_accessions	GEO_series_accession	PubMed_ID	Notes on processing
human AD vs. healthy brains	1.54557	4.14e-51	1.3248e-49	844	1666	0.506603	14629	44631	0.327777	SRR611065-SRR611070	n/a	24023061
12 mouse tissues (Hogenesch)	1.72986	7.09342e-280	2.26989e-278	3358	7097	0.473158	10674	39024	0.273524	SRR1158513-SRR1158608	GSE54651	25349387
cortex development	1.72416	5.00E-324	1.60E-322	3957	7288	0.542947	15323	48659	0.314906	SRR1805814-SRR1805829,SRR1812033,SRR1812034	n/a	25737549
heart ventricle development	1.75596	1.93e-174	6.176e-173	1794	3174	0.565217	13271	41229	0.321885	SRR964790-SRR964794	GSE49906	24752171
liver development	1.88945	8.17e-116	2.6144e-114	967	1693	0.571175	10172	33649	0.302297	SRR1917372-SRR1917379	GSE67009	26531099
C2C12 differentiation	1.62052	1.24e-87	3.968e-86	1015	1557	0.651895	25528	63459	0.402275	SRR1501308,SRR1501302,SRR1501303	GSE58928	25087874
nSR100 KO cortex (E18.5)	1.44557	1.84e-05	0.0005888	96	205	0.468293	16838	51977	0.323951	SRR1796611-SRR1796616	GSE65818	25838543
nSR100 KO hippocampus (E18.5)	1.60587	1.76e-09	5.632e-08	116	224	0.517857	16931	52503	0.322477	SRR1796617-SRR1796622	GSE65818	25838543
Ptbp2 KO brain (E18.5)	1.45433	7.65e-29	2.448e-27	586	1115	0.525561	21344	59063	0.361377	SRR1017091-SRR1017094	GSE51740	24448406
Ptbp2 KO brain (P1)	1.60661	1.86e-28	5.952e-27	383	719	0.532684	16679	50305	0.331557	SRR1017095,SRR1017096	GSE51740	24448406
Rbfox1 KO brain (P30)	1.32855	5.16e-22	1.6512e-20	563	846	0.665485	38794	77447	0.50091	SRR1035716,SRR997302	n/a	24213538
Rbfox2 KO brain (P30)	1.29999	1.79e-38	5.728e-37	1152	1718	0.670547	36870	71480	0.515809	SRR1035717,SRR1035718	n/a	24213538
Mbnl1 KO brain (Adult)	1.93215	7.33e-09	2.3456e-07	65	139	0.467626	4180	17271	0.242024	SRR533609-SRR533621	GSE39911	22901804	pooled replicates
Mbnl2 KO hippocampus (Adult)	1.41187	0.00252694	0.0808622	63	186	0.33871	1954	8145	0.239902	SRR504379-SRR504385	GSE38497	22884328
Rbm24 KO heart (E11.5)	1.68189	1.89e-05	0.0006048	56	131	0.427481	4285	16859	0.254167	SRR1508216-SRR1508218,SRR1508225-SRR1508227	n/a	25313962
Srsf10 KO heart (E13.5)	1.72266	1.1e-18	3.52e-17	217	506	0.428854	5863	23551	0.248949	SRR1917052,SRR1917053	GSE66965	26586428
hnRNP U KO heart (P14)	1.84518	2.86e-44	9.152e-43	436	969	0.449948	4848	19881	0.243851	SRR1986952-SRR1986955	GSE68178	26039991
Mbnl1 KO heart (Adult)	1.94931	4.45e-10	1.424e-08	73	147	0.496599	2330	9146	0.254756	SRR533622-SRR533633	GSE39911	22901804	pooled replicates
Celf1 OE heart (Adult)	1.80046	2e-19	6.4e-18	194	431	0.450116	2174	8696	0.25	SRR1205699-SRR1205701,SRR1205714-SRR1205718	GSE56185	24752171	pooled replicates
Celf2 OE heart (Adult)	1.85694	1.42e-14	4.544e-13	133	312	0.426282	2353	10250	0.229561	SRR1593043-SRR1593048	GSE61893	25883322
Mbnl1 KO muscle (Adult)	2.06208	1.36e-10	4.352e-09	65	123	0.528455	1634	6376	0.256274	SRR533634-SRR533643	GSE39911	22901804	pooled replicates
Celf1 OE muscle (Adult)	1.90396	1.39e-25	4.448e-24	219	457	0.479212	2342	9305	0.251693	SRR1593024-SRR1593029	GSE61893	25883322	pooled replicates
Esrp1 KO epidermis (E18.5)	1.54439	1.81e-07	5.792e-06	107	231	0.463203	10582	35282	0.299926	SRR1725980-SRR1725984	GSE64357	26371508
Esrp1&2 DKO epidermis (E18.5)	1.74914	9.95e-37	3.184e-35	385	736	0.523098	10395	34759	0.299059	SRR1725983-SRR1725984,SRR1725976-SRR1725977	GSE64357	26371508
Rbfox2 KD undiff C2C12	1.54724	1.46e-29	4.672e-28	405	652	0.621166	25726	64080	0.401467	SRR1501308-SRR1501310	GSE58928	25087874
Rbfox1 KD diff C2C12	1.63765	3.12e-06	9.984e-05	55	84	0.654762	26723	66838	0.399817	SRR1501302,SRR1501303,SRR1501311,SRR1501312	GSE58928	25087874
Rbfox2 KD diff C2C12	1.47816	1.28e-24	4.096e-23	420	710	0.591549	26714	66753	0.400192	SRR1501302-SRR1501307	GSE58928	25087874
Rbfox1&3 DKD cultured hipp. neurons	1.53375	0.00349864	0.111956	36	86	0.418605	9148	33518	0.272928	SRR2153901-SRR2153904	GSE71916	26687839
Ptbp1 KD N2A	1.44123	1.63e-39	5.216e-38	721	1133	0.636364	31477	71289	0.441541	SRR1107524,SRR1107525	GSE52856	n/a
Ptbp2 KD N2A	1.48347	4.2e-23	1.344e-21	348	530	0.656604	31369	70872	0.442615	SRR1107524,SRR1043121	GSE52856	n/a
Ptbp1&2 DKD N2A	1.40053	2.1e-57	6.72e-56	1252	2024	0.618577	31524	71374	0.441673	SRR1107524,SRR1043122	GSE52856	n/a
Rbfox2 KD mESCs	2.05518	1.53e-38	4.896e-37	265	492	0.538618	4741	18090	0.262078	SRR1165129-SRR1165136	GSE54794	24637117
SUMMARY (Medians)	1.62909					0.524329			0.308602
