# Supplementary material for: A new view of transcriptome complexity and regulation through the lens of local splicing variations
Source: eLife journal article supplement (doi:10.7554/elife.11752), 2016-02-01
Supplement: supp [file elife-11752-supp-v1.zip]

A

Diagram A illustrates a protein structure with five domains labeled 13 to 17. Domains 13, 14, 15, 16, and 17 are shown as colored blocks (grey, red, blue, green, and purple respectively). Arrows indicate interactions: a red arrow from 13 to 14, a blue arrow from 14 to 15, a green arrow from 15 to 16, and a purple arrow from 16 to 17. A dashed black arrow points from 15 to 16. A long purple arc connects domain 13 to domain 17, and a long green arc connects domain 14 to domain 16.
