# Supplementary material for: A new view of transcriptome complexity and regulation through the lens of local splicing variations
Source: eLife. 2016 Feb 1;5:e11752. doi: 10.7554/eLife.11752 (PMC4801060; doi:10.7554/eLife.11752)
Supplement: Supplementary file 1. — DOI: http://dx.doi.org/10.7554/eLife.11752.025 [file elife-11752-supp1.xlsx]

## Sheet: README
Each tab contains the enrichment of protein features (PFs) given 2 groups of LSV junctions (i.e. LSV junctions from complex vs binary LSVs). The attached legend should be used in order to identify which groups are compared following the convention group1 vs group2. For example, the tab BC vs BNC should be read as PF enrichment table when comparing binary (B) changing (C) LSV junctions versus bina…
LSV junctions groups legend		Columns
B = Binary	BC = Binary & Changing	Column	Description
X = Complex	BX = Binary & Non-changing	Groups	Groups of junctions compared (see legend)
C = Changing	XC = Complex & Changing	Pro_Feat	ID unique for a given database/source
NC = Non-changing	XNC = Complex & Non-changing	PF_Type	Database/source of the PF
		PF_Desc	PF description (when available)
		x	number of junctions from group1 having a given PF
		k	total number of junctions from group1
		N	number of junctions having a given PF (both group1 and group2)
		M	number of junctions from both groups 1 and 2
		x/k (R+)	fraction of junctions having a PF from total number of junctions in group1 (positive ratio, R+)
		(N-x)/(M-k) (R-)	fraction of junctions not having a given PF from total number of junctions in group2 (negative ratio, R-)
		log2(R+/R-)	log2 of the positive and negative ratios to compute the direction of the enrichment
		P_value	P-value of the FET score for a given PF
		E(P_value)	Corrected p-value

## Sheet: BC vs BNC
Groups	PF	PF_Type	PF_Desc	x	k	N	M	x/k	(N-x)/(M-k)	log2(R+/R-)	P_value	E(P_value)
BC_BNC	SignalP-noTM	SignalP		38	3776	435	19176	0.010064	0.025779	-1.35707	0	0
BC_BNC	seg	Seg		1547	3776	6690	19176	0.409693	0.333961	0.294863	0	0
BC_BNC	TMhelix	Tmhmm		280	3776	1873	19176	0.074153	0.103442	-0.480248	0	0.0002
BC_BNC	PTHR12751	PANTHER		11	3776	13	19176	0.002913	0.00013	4.48743	1e-06	0.0013
BC_BNC	PS01159	Prosite_patterns	WW domain	16	3776	25	19176	0.004237	0.000584	2.85807	2e-06	0.002
BC_BNC	SSF51045	Superfamily	WW domain	19	3776	34	19176	0.005032	0.000974	2.36904	3e-06	0.0025
BC_BNC	3.40.50.300	Gene3D		43	3776	392	19176	0.011388	0.022662	-0.992819	3e-06	0.0026
BC_BNC	Coil	ncoils		409	3776	1700	19176	0.108316	0.083831	0.369683	4e-06	0.0027
BC_BNC	SSF52540	Superfamily	P-loop containing nucleoside triphosphate hydrolase	48	3776	422	19176	0.012712	0.024286	-0.933932	6e-06	0.0035
BC_BNC	2.20.70.10	Gene3D		18	3776	33	19176	0.004767	0.000974	2.29103	9e-06	0.0047
BC_BNC	PTHR12420	PANTHER		7	3776	7	19176	0.001854	0	inf	1.1e-05	0.0051
BC_BNC	PTHR12420:SF11	PANTHER		7	3776	7	19176	0.001854	0	inf	1.1e-05	0.0051
BC_BNC	SM01020	Smart	Beta-adaptin appendage, C-terminal subdomain	7	3776	7	19176	0.001854	0	inf	1.1e-05	0.0051
BC_BNC	PS50020	Prosite_profiles	WW domain	17	3776	31	19176	0.004502	0.000909	2.30811	1.5e-05	0.006
BC_BNC	PF01370	Pfam	NAD-dependent epimerase/dehydratase, N-terminal domain	8	3776	9	19176	0.002119	6.5e-05	5.028	1.7e-05	0.0064
BC_BNC	SM00228	Smart	PDZ domain	35	3776	89	19176	0.009269	0.003506	1.4024	2.1e-05	0.0076
BC_BNC	PF09738	Pfam	Leucine-rich repeat flightless-interacting protein	11	3776	16	19176	0.002913	0.000325	3.1655	2.8e-05	0.009
BC_BNC	SSF57903	Superfamily	Zinc finger, FYVE/PHD-type	24	3776	54	19176	0.006356	0.001948	1.70607	3.8e-05	0.0116
BC_BNC	PF00397	Pfam	WW domain	16	3776	30	19176	0.004237	0.000909	2.22065	4.2e-05	0.0123
BC_BNC	SM00456	Smart	WW domain	16	3776	30	19176	0.004237	0.000909	2.22065	4.2e-05	0.0123
BC_BNC	SM00249	Smart	Zinc finger, PHD-type	13	3776	22	19176	0.003443	0.000584	2.55851	5.4e-05	0.0149
BC_BNC	3.10.350.10	Gene3D		6	3776	6	19176	0.001589	0	inf	5.8e-05	0.016
BC_BNC	3.10.580.10	Gene3D		6	3776	6	19176	0.001589	0	inf	5.8e-05	0.016
BC_BNC	3.30.890.10	Gene3D		6	3776	6	19176	0.001589	0	inf	5.8e-05	0.016
BC_BNC	PF01429	Pfam	Methyl-CpG DNA binding	6	3776	6	19176	0.001589	0	inf	5.8e-05	0.016
BC_BNC	PR01802	PRINTS	Synembryn	6	3776	6	19176	0.001589	0	inf	5.8e-05	0.016
BC_BNC	PS50982	Prosite_profiles	Methyl-CpG DNA binding	6	3776	6	19176	0.001589	0	inf	5.8e-05	0.016
BC_BNC	PTHR11915:SF247	PANTHER		6	3776	6	19176	0.001589	0	inf	5.8e-05	0.016
BC_BNC	PTHR12751:SF4	PANTHER		6	3776	6	19176	0.001589	0	inf	5.8e-05	0.016
BC_BNC	PTHR20932	PANTHER		6	3776	6	19176	0.001589	0	inf	5.8e-05	0.016
BC_BNC	PTHR20932:SF7	PANTHER		6	3776	6	19176	0.001589	0	inf	5.8e-05	0.016
BC_BNC	SM00257	Smart	LysM domain	6	3776	6	19176	0.001589	0	inf	5.8e-05	0.016
BC_BNC	SM00391	Smart	Methyl-CpG DNA binding	6	3776	6	19176	0.001589	0	inf	5.8e-05	0.016
BC_BNC	SSF54171	Superfamily	DNA-binding domain	6	3776	6	19176	0.001589	0	inf	5.8e-05	0.016
BC_BNC	SSF54631	Superfamily		6	3776	6	19176	0.001589	0	inf	5.8e-05	0.016
BC_BNC	3.80.10.10	Gene3D		5	3776	97	19176	0.001324	0.005974	-2.17363	8.9e-05	0.0234
BC_BNC	SSF50156	Superfamily	PDZ domain	36	3776	98	19176	0.009534	0.004026	1.24373	9.7e-05	0.0242
BC_BNC	PS50106	Prosite_profiles	PDZ domain	34	3776	92	19176	0.009004	0.003766	1.25748	0.000107	0.0264
BC_BNC	2.30.42.10	Gene3D		36	3776	100	19176	0.009534	0.004156	1.19792	0.000126	0.035
BC_BNC	SSF50249	Superfamily	Nucleic acid-binding, OB-fold	0	3776	43	19176	0	0.002792	-inf	0.000142	0.0383
BC_BNC	SSF52058	Superfamily		3	3776	73	19176	0.000794	0.004545	-2.51632	0.000182	0.0485

## Sheet: XC vs BC
Groups	PF	PF_Type	PF_Desc	x	k	N	M	x/k	(N-x)/(M-k)	log2(R+/R-)	P_value	E(P_value)
XC_BC	SSF49265	Superfamily	Fibronectin type III	1	2655	34	6431	0.000377	0.008739	-4.53625	0	0.0001
XC_BC	PS50853	Prosite_profiles	Fibronectin type III	1	2655	33	6431	0.000377	0.008475	-4.49185	1e-06	0.0004
XC_BC	SignalP-noTM	SignalP		68	2655	106	6431	0.025612	0.010064	1.34768	2e-06	0.0007
XC_BC	SM00060	Smart	Fibronectin type III	1	2655	29	6431	0.000377	0.007415	-4.29921	5e-06	0.0015
XC_BC	PS50021	Prosite_profiles	Calponin homology domain	0	2655	21	6431	0	0.005561	-inf	1.7e-05	0.0051
XC_BC	SM00033	Smart	Calponin homology domain	0	2655	19	6431	0	0.005032	-inf	5.8e-05	0.0219
XC_BC	PF00412	Pfam	Zinc finger, LIM-type	11	2655	11	6431	0.004143	0	inf	5.9e-05	0.0222
XC_BC	PS50023	Prosite_profiles	Zinc finger, LIM-type	11	2655	11	6431	0.004143	0	inf	5.9e-05	0.0222
XC_BC	SM00132	Smart	Zinc finger, LIM-type	11	2655	11	6431	0.004143	0	inf	5.9e-05	0.0222
XC_BC	PF00041	Pfam	Fibronectin type III	1	2655	23	6431	0.000377	0.005826	-3.95128	0.00014	0.0487

## Sheet: XC vs XNC
Groups	PF	PF_Type	PF_Desc	x	k	N	M	x/k	(N-x)/(M-k)	log2(R+/R-)	P_value	E(P_value)
XC_XNC	1.10.630.10	Gene3D		0	2655	80	11937	0	0.008619	-inf	0	0
XC_XNC	2.40.128.20	Gene3D		1	2655	121	11937	0.000377	0.012928	-5.10117	0	0
XC_XNC	PF00061	Pfam	Lipocalin/cytosolic fatty-acid binding domain	1	2655	109	11937	0.000377	0.011635	-4.94916	0	0
XC_XNC	PF00067	Pfam	Cytochrome P450	0	2655	82	11937	0	0.008834	-inf	0	0
XC_XNC	PR00385	PRINTS	Cytochrome P450	2	2655	99	11937	0.000753	0.01045	-3.79419	0	0
XC_XNC	PR00463	PRINTS	Cytochrome P450, E-class, group I	0	2655	101	11937	0	0.010881	-inf	0	0
XC_XNC	SSF48264	Superfamily	Cytochrome P450	0	2655	81	11937	0	0.008727	-inf	0	0
XC_XNC	SSF50814	Superfamily	Calycin-like	1	2655	119	11937	0.000377	0.012713	-5.07692	0	0
XC_XNC	SignalP-noTM	SignalP		68	2655	619	11937	0.025612	0.059362	-1.21272	0	0
XC_XNC	seg	Seg		1115	2655	3939	11937	0.419962	0.304245	0.465027	0	0
XC_XNC	PR01221	PRINTS	Major urinary protein	0	2655	64	11937	0	0.006895	-inf	0	0.0001
XC_XNC	PTHR24300	PANTHER		0	2655	63	11937	0	0.006787	-inf	0	0.0001
XC_XNC	PR00179	PRINTS	Lipocalin	1	2655	72	11937	0.000377	0.007649	-4.34402	0	0.0002
XC_XNC	SSF52833	Superfamily	Thioredoxin-like fold	5	2655	106	11937	0.001883	0.010881	-2.53056	1e-06	0.0003
XC_XNC	3.40.30.10	Gene3D		6	2655	111	11937	0.00226	0.011312	-2.32356	2e-06	0.0003
XC_XNC	PTHR11430:SF71	PANTHER		0	2655	54	11937	0	0.005818	-inf	2e-06	0.0003
XC_XNC	PF12424	Pfam	Plasma membrane calcium transporting P-type ATPase, C-terminal	13	2655	17	11937	0.004896	0.000431	3.50616	3e-06	0.0004
XC_XNC	2.10.70.10	Gene3D		0	2655	49	11937	0	0.005279	-inf	7e-06	0.001
XC_XNC	PF09738	Pfam	Leucine-rich repeat flightless-interacting protein	14	2655	20	11937	0.005273	0.000646	3.02812	7e-06	0.0011
XC_XNC	PF15222	Pfam	Kidney androgen-regulated protein	0	2655	48	11937	0	0.005171	-inf	1.1e-05	0.0013
XC_XNC	SM00356	Smart	Zinc finger, CCCH-type	10	2655	12	11937	0.003766	0.000215	4.12765	1.2e-05	0.0013
XC_XNC	PTHR11430	PANTHER		1	2655	57	11937	0.000377	0.006033	-4.00163	1.7e-05	0.0016
XC_XNC	SSF57535	Superfamily	Sushi/SCR/CCP domain	0	2655	45	11937	0	0.004848	-inf	1.7e-05	0.0016
XC_XNC	PR01686	PRINTS	Cytochrome P450, E-class, group I, CYP2D-like	0	2655	42	11937	0	0.004525	-inf	4.4e-05	0.0035
XC_XNC	PS50923	Prosite_profiles	Sushi/SCR/CCP domain	0	2655	42	11937	0	0.004525	-inf	4.4e-05	0.0035
XC_XNC	PTHR11915	PANTHER		18	2655	33	11937	0.00678	0.001616	2.06876	5.3e-05	0.0036
XC_XNC	SSF49265	Superfamily	Fibronectin type III	1	2655	52	11937	0.000377	0.005495	-3.8667	6.7e-05	0.0051
XC_XNC	PS50853	Prosite_profiles	Fibronectin type III	1	2655	49	11937	0.000377	0.005171	-3.77924	9.9e-05	0.0068
XC_XNC	SM00043	Smart	Cystatin domain	0	2655	38	11937	0	0.004094	-inf	0.00011	0.0074
XC_XNC	SSF54403	Superfamily		0	2655	38	11937	0	0.004094	-inf	0.00011	0.0074
XC_XNC	3.10.450.10	Gene3D		0	2655	39	11937	0	0.004202	-inf	0.00012	0.0082
XC_XNC	PF04201	Pfam	Tumour protein D52	6	2655	6	11937	0.00226	0	inf	0.000121	0.0085
XC_XNC	PF04382	Pfam	SAB domain	6	2655	6	11937	0.00226	0	inf	0.000121	0.0085
XC_XNC	PIRSF002304	PIRSF		6	2655	6	11937	0.00226	0	inf	0.000121	0.0085
XC_XNC	PTHR19307	PANTHER		6	2655	6	11937	0.00226	0	inf	0.000121	0.0085
XC_XNC	PTHR23280:SF17	PANTHER		6	2655	6	11937	0.00226	0	inf	0.000121	0.0085
XC_XNC	PTHR11208:SF36	PANTHER		8	2655	10	11937	0.003013	0.000215	3.80572	0.000172	0.0112
XC_XNC	PTHR23122	PANTHER		7	2655	8	11937	0.002637	0.000108	4.61308	0.000173	0.0112
XC_XNC	PTHR23122:SF40	PANTHER		7	2655	8	11937	0.002637	0.000108	4.61308	0.000173	0.0112
XC_XNC	3.40.50.2000	Gene3D		0	2655	37	11937	0	0.003986	-inf	0.000187	0.0118
XC_XNC	PF00084	Pfam	Sushi/SCR/CCP domain	0	2655	37	11937	0	0.003986	-inf	0.000187	0.0118
XC_XNC	SM00032	Smart	Sushi/SCR/CCP domain	0	2655	37	11937	0	0.003986	-inf	0.000187	0.0118
XC_XNC	PS50103	Prosite_profiles	Zinc finger, CCCH-type	11	2655	17	11937	0.004143	0.000646	2.68019	0.000207	0.0133
XC_XNC	PS00086	Prosite_patterns	Cytochrome P450, conserved site	2	2655	55	11937	0.000753	0.00571	-2.9222	0.000242	0.0163
XC_XNC	SSF49313	Superfamily	Cadherin-like	0	2655	34	11937	0	0.003663	-inf	0.000279	0.0203
XC_XNC	SM00225	Smart	BTB/POZ domain	15	2655	28	11937	0.00565	0.001401	2.01218	0.000291	0.0209
XC_XNC	PTHR24265	PANTHER		0	2655	35	11937	0	0.003771	-inf	0.000293	0.0209
XC_XNC	3.10.200.10	Gene3D		0	2655	32	11937	0	0.003448	-inf	0.000447	0.0295
XC_XNC	PF00194	Pfam	Alpha carbonic anhydrase	0	2655	32	11937	0	0.003448	-inf	0.000447	0.0295
XC_XNC	PR00708	PRINTS	Alpha-1-acid glycoprotein	0	2655	32	11937	0	0.003448	-inf	0.000447	0.0295
XC_XNC	PS51144	Prosite_profiles	Alpha carbonic anhydrase	0	2655	32	11937	0	0.003448	-inf	0.000447	0.0295
XC_XNC	PTHR18952	PANTHER		0	2655	32	11937	0	0.003448	-inf	0.000447	0.0295
XC_XNC	SM01057	Smart	Alpha carbonic anhydrase	0	2655	32	11937	0	0.003448	-inf	0.000447	0.0295
XC_XNC	SSF51069	Superfamily	Alpha carbonic anhydrase	0	2655	32	11937	0	0.003448	-inf	0.000447	0.0295
XC_XNC	PF02453	Pfam	Reticulon	8	2655	11	11937	0.003013	0.000323	3.22076	0.000508	0.0459
XC_XNC	PTHR11208	PANTHER		8	2655	11	11937	0.003013	0.000323	3.22076	0.000508	0.0459
XC_XNC	PTHR11243:SF15	PANTHER		5	2655	5	11937	0.001883	0	inf	0.000543	0.0484
XC_XNC	PTHR15136	PANTHER		5	2655	5	11937	0.001883	0	inf	0.000543	0.0484
XC_XNC	PTHR15136:SF9	PANTHER		5	2655	5	11937	0.001883	0	inf	0.000543	0.0484
XC_XNC	PTHR11915:SF212	PANTHER		12	2655	21	11937	0.00452	0.00097	2.22076	0.000546	0.0485

## Sheet: X vs B
Groups	PF	PF_Type	PF_Desc	x	k	N	M	x/k	(N-x)/(M-k)	log2(R+/R-)	P_value	E(P_value)
X_B	53473	Superfamily		20	15878	20	42168	0.00126	0	inf	0	0
X_B	1.10.238.10	Gene3D		156	15878	282	42168	0.009825	0.004793	1.03561	0	0
X_B	1.10.246.10	Gene3D		41	15878	51	42168	0.002582	0.00038	2.76311	0	0
X_B	1.10.510.10	Gene3D		62	15878	317	42168	0.003905	0.0097	-1.31267	0	0
X_B	1.25.10.10	Gene3D		33	15878	187	42168	0.002078	0.005858	-1.49491	0	0
X_B	2.40.10.10	Gene3D		49	15878	63	42168	0.003086	0.000533	2.53484	0	0
X_B	2.40.128.20	Gene3D		129	15878	157	42168	0.008124	0.001065	2.93136	0	0
X_B	2.60.40.10	Gene3D		242	15878	868	42168	0.015241	0.023811	-0.643671	0	0
X_B	2.60.40.180	Gene3D		18	15878	18	42168	0.001134	0	inf	0	0
X_B	3.10.450.10	Gene3D		42	15878	57	42168	0.002645	0.000571	2.21291	0	0
X_B	PF00031	Pfam	Cystatin domain	30	15878	34	42168	0.001889	0.000152	3.63438	0	0
X_B	PF00061	Pfam	Lipocalin/cytosolic fatty-acid binding domain	117	15878	141	42168	0.007369	0.000913	3.01289	0	0
X_B	PF00089	Pfam	Serine proteases, trypsin domain	49	15878	60	42168	0.003086	0.000418	2.88276	0	0
X_B	PF00274	Pfam	Fructose-bisphosphate aldolase, class-I	17	15878	17	42168	0.001071	0	inf	0	0
X_B	PF00576	Pfam	Transthyretin/hydroxyisourate hydrolase, superfamily	18	15878	18	42168	0.001134	0	inf	0	0
X_B	PF02023	Pfam	SCAN domain	30	15878	37	42168	0.001889	0.000266	2.82702	0	0
X_B	PF04711	Pfam		20	15878	20	42168	0.00126	0	inf	0	0
X_B	PF06954	Pfam	Resistin	31	15878	33	42168	0.001952	7.6e-05	4.68168	0	0
X_B	PF13895	Pfam		17	15878	115	42168	0.001071	0.003728	-1.79976	0	0
X_B	PF15222	Pfam	Kidney androgen-regulated protein	48	15878	48	42168	0.003023	0	inf	0	0
X_B	PIRSF036899	PIRSF	Alpha-1-acid glycoprotein	37	15878	45	42168	0.00233	0.000304	2.93694	0	0
X_B	PR00179	PRINTS	Lipocalin	73	15878	90	42168	0.004598	0.000647	2.82985	0	0
X_B	PR00189	PRINTS	Transthyretin/hydroxyisourate hydrolase	18	15878	18	42168	0.001134	0	inf	0	0
X_B	PR00708	PRINTS	Alpha-1-acid glycoprotein	40	15878	48	42168	0.002519	0.000304	3.04941	0	0
X_B	PR00722	PRINTS	Peptidase S1A, chymotrypsin-type	49	15878	56	42168	0.003086	0.000266	3.53484	0	0
X_B	PR00804	PRINTS	Vitamin D-binding protein	35	15878	39	42168	0.002204	0.000152	3.85677	0	0
X_B	PR01221	PRINTS	Major urinary protein	65	15878	75	42168	0.004094	0.00038	3.42793	0	0
X_B	PR01697	PRINTS		26	15878	28	42168	0.001637	7.6e-05	4.42793	0	0
X_B	PS00135	Prosite_patterns	Peptidase S1, trypsin family, active site	31	15878	31	42168	0.001952	0	inf	0	0
X_B	PS00212	Prosite_patterns	Serum albumin, conserved site	20	15878	21	42168	0.00126	3.8e-05	5.04941	0	0
X_B	PS00213	Prosite_patterns	Lipocalin family conserved site	55	15878	59	42168	0.003464	0.000152	4.50884	0	0
X_B	PS01254	Prosite_patterns	Proteinase inhibitor I25C, fetuin, conserved site	26	15878	30	42168	0.001637	0.000152	3.42793	0	0
X_B	PS50222	Prosite_profiles	EF-hand domain	157	15878	267	42168	0.009888	0.004184	1.24075	0	0
X_B	PS50240	Prosite_profiles	Serine proteases, trypsin domain	39	15878	46	42168	0.002456	0.000266	3.20553	0	0
X_B	PS50404	Prosite_profiles	Glutathione S-transferase, N-terminal	56	15878	75	42168	0.003527	0.000723	2.28691	0	0
X_B	PS50804	Prosite_profiles	SCAN domain	30	15878	37	42168	0.001889	0.000266	2.82702	0	0
X_B	PTHR10395	PANTHER		22	15878	24	42168	0.001386	7.6e-05	4.18692	0	0
X_B	PTHR10395:SF12	PANTHER		18	15878	18	42168	0.001134	0	inf	0	0
X_B	PTHR10689	PANTHER		28	15878	28	42168	0.001763	0	inf	0	0
X_B	PTHR10689:SF3	PANTHER		28	15878	28	42168	0.001763	0	inf	0	0
X_B	PTHR11027	PANTHER		20	15878	20	42168	0.00126	0	inf	0	0
X_B	PTHR11027:SF0	PANTHER		20	15878	20	42168	0.00126	0	inf	0	0
X_B	PTHR11430	PANTHER		58	15878	68	42168	0.003653	0.00038	3.26354	0	0
X_B	PTHR11430:SF71	PANTHER		55	15878	65	42168	0.003464	0.00038	3.18692	0	0
X_B	PTHR11461	PANTHER		57	15878	85	42168	0.00359	0.001065	1.75302	0	0
X_B	PTHR11627	PANTHER		17	15878	17	42168	0.001071	0	inf	0	0
X_B	PTHR11653	PANTHER		20	15878	20	42168	0.00126	0	inf	0	0
X_B	PTHR11967	PANTHER		37	15878	45	42168	0.00233	0.000304	2.93694	0	0
X_B	PTHR11967:SF2	PANTHER		37	15878	45	42168	0.00233	0.000304	2.93694	0	0
X_B	PTHR12232:SF1	PANTHER		32	15878	36	42168	0.002015	0.000152	3.72749	0	0
X_B	PTHR15301	PANTHER		17	15878	17	42168	0.001071	0	inf	0	0
X_B	PTHR16565	PANTHER		19	15878	19	42168	0.001197	0	inf	0	0
X_B	PTHR21101	PANTHER		30	15878	32	42168	0.001889	7.6e-05	4.63438	0	0
X_B	PTHR21101:SF11	PANTHER		30	15878	30	42168	0.001889	0	inf	0	0
X_B	PTHR23048	PANTHER		40	15878	42	42168	0.002519	7.6e-05	5.04941	0	0
X_B	PTHR23049	PANTHER		22	15878	24	42168	0.001386	7.6e-05	4.18692	0	0
X_B	PTHR23226	PANTHER		45	15878	57	42168	0.002834	0.000456	2.63438	0	0
X_B	PTHR24084	PANTHER		18	15878	18	42168	0.001134	0	inf	0	0
X_B	PTHR24265	PANTHER		39	15878	42	42168	0.002456	0.000114	4.42793	0	0
X_B	PTHR24265:SF83	PANTHER		34	15878	34	42168	0.002141	0	inf	0	0
X_B	SM00020	Smart	Serine proteases, trypsin domain	49	15878	56	42168	0.003086	0.000266	3.53484	0	0
X_B	SM00054	Smart	EF-hand domain	121	15878	204	42168	0.007621	0.003157	1.27131	0	0
X_B	SM00093	Smart	Serpin domain	57	15878	85	42168	0.00359	0.001065	1.75302	0	0
X_B	SM00095	Smart	Transthyretin/hydroxyisourate hydrolase, superfamily	18	15878	18	42168	0.001134	0	inf	0	0
X_B	SM00220	Smart	Serine/threonine/dual specificity protein kinase, catalytic domain	56	15878	264	42168	0.003527	0.007912	-1.1656	0	0
X_B	SM00248	Smart	Ankyrin repeat	41	15878	204	42168	0.002582	0.0062	-1.26369	0	0
X_B	SSF111423	Superfamily	Resistin	31	15878	33	42168	0.001952	7.6e-05	4.68168	0	0
X_B	SSF47353	Superfamily	Retrovirus capsid, C-terminal	30	15878	37	42168	0.001889	0.000266	2.82702	0	0
X_B	SSF47473	Superfamily		160	15878	297	42168	0.010077	0.005211	0.951381	0	0
X_B	SSF48371	Superfamily	Armadillo-type fold	94	15878	382	42168	0.00592	0.010955	-0.887851	0	0
X_B	SSF48552	Superfamily	Serum albumin-like	40	15878	50	42168	0.002519	0.00038	2.72749	0	0
X_B	SSF49472	Superfamily	Transthyretin/hydroxyisourate hydrolase, superfamily	18	15878	18	42168	0.001134	0	inf	0	0
X_B	SSF50494	Superfamily	Peptidase S1, PA clan	44	15878	57	42168	0.002771	0.000494	2.48648	0	0
X_B	SSF50814	Superfamily	Calycin-like	127	15878	155	42168	0.007998	0.001065	2.90882	0	0
X_B	SSF54403	Superfamily		40	15878	53	42168	0.002519	0.000494	2.34897	0	0
X_B	SSF56574	Superfamily	Serpin domain	57	15878	85	42168	0.00359	0.001065	1.75302	0	0
X_B	SignalP-noTM	SignalP		762	15878	1334	42168	0.047991	0.021757	1.14126	0	0
X_B	1iojA00	Gene3D		16	15878	16	42168	0.001008	0	inf	0	0.0001
X_B	2.10.50.10	Gene3D		16	15878	16	42168	0.001008	0	inf	0	0.0001
X_B	3.30.450.30	Gene3D		16	15878	16	42168	0.001008	0	inf	0	0.0001
X_B	PF00079	Pfam	Serpin domain	57	15878	87	42168	0.00359	0.001141	1.65348	0	0.0001
X_B	PF02798	Pfam	Glutathione S-transferase, N-terminal	35	15878	46	42168	0.002204	0.000418	2.39734	0	0.0001
X_B	PF04691	Pfam	Apolipoprotein C-I	16	15878	16	42168	0.001008	0	inf	0	0.0001
X_B	PR00385	PRINTS	Cytochrome P450	103	15878	181	42168	0.006487	0.002967	1.12858	0	0.0001
X_B	PR00613	PRINTS	Myoglobin	21	15878	23	42168	0.001323	7.6e-05	4.1198	0	0.0001
X_B	PTHR11442:SF5	PANTHER		21	15878	23	42168	0.001323	7.6e-05	4.1198	0	0.0001
X_B	PTHR23049:SF10	PANTHER		16	15878	16	42168	0.001008	0	inf	0	0.0001
X_B	SM00208	Smart	TNFR/NGFR cysteine-rich region	16	15878	16	42168	0.001008	0	inf	0	0.0001
X_B	1.10.135.10	Gene3D		24	15878	28	42168	0.001512	0.000152	3.31245	0	0.0002
X_B	3.30.497.10	Gene3D		56	15878	86	42168	0.003527	0.001141	1.62795	0	0.0002
X_B	PF02807	Pfam	ATP:guanido phosphotransferase, N-terminal	24	15878	28	42168	0.001512	0.000152	3.31245	0	0.0002
X_B	PF10506	Pfam	Usher syndrome type-1C protein-binding protein 1, PDZ domain	15	15878	15	42168	0.000945	0	inf	0	0.0002
X_B	PS51509	Prosite_profiles	ATP:guanido phosphotransferase, N-terminal	24	15878	28	42168	0.001512	0.000152	3.31245	0	0.0002
X_B	PTHR12454:SF3	PANTHER		18	15878	19	42168	0.001134	3.8e-05	4.89741	0	0.0002
X_B	PTHR19305:SF1	PANTHER		15	15878	15	42168	0.000945	0	inf	0	0.0002
X_B	PTHR19957	PANTHER		37	15878	50	42168	0.00233	0.000494	2.2365	0	0.0002
X_B	PTHR23339	PANTHER		18	15878	19	42168	0.001134	3.8e-05	4.89741	0	0.0002
X_B	SM00431	Smart	SCAN domain	30	15878	38	42168	0.001889	0.000304	2.63438	0	0.0002
X_B	SSF48034	Superfamily	ATP:guanido phosphotransferase, N-terminal	24	15878	28	42168	0.001512	0.000152	3.31245	0	0.0002
X_B	PTHR12232	PANTHER		32	15878	42	42168	0.002015	0.00038	2.40556	0	0.0003
X_B	PTHR22826:SF103	PANTHER		28	15878	35	42168	0.001763	0.000266	2.72749	0	0.0003
X_B	PF00042	Pfam	Globin	23	15878	27	42168	0.001449	0.000152	3.25105	1e-06	0.0003
X_B	PF12424	Pfam	Plasma membrane calcium transporting P-type ATPase, C-terminal	23	15878	27	42168	0.001449	0.000152	3.25105	1e-06	0.0003
X_B	PTHR11521:SF5	PANTHER		29	15878	37	42168	0.001826	0.000304	2.58547	1e-06	0.0004
X_B	SM00409	Smart	Immunoglobulin subtype	137	15878	506	42168	0.008628	0.014036	-0.70196	1e-06	0.0004
X_B	PF13499	Pfam	EF-hand domain pair	75	15878	125	42168	0.004724	0.001902	1.31245	1e-06	0.0005
X_B	PF01920	Pfam	Prefoldin beta-like	19	15878	21	42168	0.001197	7.6e-05	3.97541	1e-06	0.0006
X_B	Coil	ncoils		1197	15878	3536	42168	0.075387	0.088969	-0.238984	1e-06	0.001
X_B	PS50297	Prosite_profiles	Ankyrin repeat-containing domain	33	15878	166	42168	0.002078	0.005059	-1.2834	1e-06	0.001
X_B	PF08585	Pfam	RecQ mediated genome instability protein, N-terminal	14	15878	14	42168	0.000882	0	inf	1e-06	0.0011
X_B	PIRSF037992	PIRSF	Heterogeneous nuclear ribonucleoprotein C	14	15878	14	42168	0.000882	0	inf	1e-06	0.0011
X_B	PS51530	Prosite_profiles	Fetuin-B-type cystatin domain	14	15878	14	42168	0.000882	0	inf	1e-06	0.0011
X_B	PTHR13968:SF17	PANTHER		14	15878	14	42168	0.000882	0	inf	1e-06	0.0011
X_B	PTHR31638	PANTHER		14	15878	14	42168	0.000882	0	inf	1e-06	0.0011
X_B	PTHR31638:SF1	PANTHER		14	15878	14	42168	0.000882	0	inf	1e-06	0.0011
X_B	PF00069	Pfam	Protein kinase domain	68	15878	283	42168	0.004283	0.008178	-0.933245	1e-06	0.0014
X_B	PF12796	Pfam	Ankyrin repeat-containing domain	41	15878	192	42168	0.002582	0.005744	-1.15337	1e-06	0.0014
X_B	SSF56112	Superfamily	Protein kinase-like domain	102	15878	392	42168	0.006424	0.011031	-0.779999	1e-06	0.0014
X_B	SSF90257	Superfamily		77	15878	131	42168	0.004849	0.002054	1.23938	1e-06	0.0014
X_B	PS00845	Prosite_patterns	CAP Gly-rich domain	20	15878	23	42168	0.00126	0.000114	3.46445	2e-06	0.0014
X_B	41785	Superfamily		18	15878	20	42168	0.001134	7.6e-05	3.89741	2e-06	0.0016
X_B	1.10.490.10	Gene3D		25	15878	31	42168	0.001575	0.000228	2.78638	2e-06	0.0016
X_B	1v54J00	Gene3D		18	15878	20	42168	0.001134	7.6e-05	3.89741	2e-06	0.0016
X_B	PF00804	Pfam	Syntaxin, N-terminal domain	25	15878	31	42168	0.001575	0.000228	2.78638	2e-06	0.0016
X_B	PF02238	Pfam		18	15878	20	42168	0.001134	7.6e-05	3.89741	2e-06	0.0016
X_B	PR00180	PRINTS	Cellular retinaldehyde binding/alpha-tocopherol transport	18	15878	20	42168	0.001134	7.6e-05	3.89741	2e-06	0.0016
X_B	PTHR10510	PANTHER		18	15878	20	42168	0.001134	7.6e-05	3.89741	2e-06	0.0016
X_B	PTHR18895:SF3	PANTHER		18	15878	20	42168	0.001134	7.6e-05	3.89741	2e-06	0.0016
X_B	2.30.30.190	Gene3D		26	15878	33	42168	0.001637	0.000266	2.62057	2e-06	0.0019
X_B	PF01302	Pfam	CAP Gly-rich domain	26	15878	33	42168	0.001637	0.000266	2.62057	2e-06	0.0019
X_B	PR00802	PRINTS	ALB/AFP/VDB	30	15878	40	42168	0.001889	0.00038	2.31245	2e-06	0.0019
X_B	PS50086	Prosite_profiles	Rab-GTPase-TBC domain	0	15878	29	42168	0	0.001103	-inf	2e-06	0.0019
X_B	SM01052	Smart	CAP Gly-rich domain	26	15878	33	42168	0.001637	0.000266	2.62057	2e-06	0.0019
X_B	PS50011	Prosite_profiles	Protein kinase domain	83	15878	328	42168	0.005227	0.009319	-0.834114	2e-06	0.0021
X_B	PS50088	Prosite_profiles	Ankyrin repeat	40	15878	187	42168	0.002519	0.005591	-1.15026	2e-06	0.0021
X_B	PS50835	Prosite_profiles	Immunoglobulin-like domain	150	15878	537	42168	0.009447	0.01472	-0.639886	2e-06	0.0021
X_B	SM00060	Smart	Fibronectin type III	47	15878	211	42168	0.00296	0.006238	-1.07548	2e-06	0.0021
X_B	SSF47391	Superfamily	cAMP-dependent protein kinase regulatory subunit, dimerization-anchoring domain	21	15878	25	42168	0.001323	0.000152	3.1198	3e-06	0.0021
X_B	PF00020	Pfam	TNFR/NGFR cysteine-rich region	13	15878	13	42168	0.000819	0	inf	3e-06	0.0024
X_B	PF06140	Pfam	Interferon alpha-inducible protein 6/27	13	15878	13	42168	0.000819	0	inf	3e-06	0.0024
X_B	PR01680	PRINTS	Fas receptor	13	15878	13	42168	0.000819	0	inf	3e-06	0.0024
X_B	PTHR12136:SF9	PANTHER		13	15878	13	42168	0.000819	0	inf	3e-06	0.0024
X_B	PTHR16932	PANTHER		13	15878	13	42168	0.000819	0	inf	3e-06	0.0024
X_B	PTHR16932:SF2	PANTHER		13	15878	13	42168	0.000819	0	inf	3e-06	0.0024
X_B	PTHR23048:SF2	PANTHER		13	15878	13	42168	0.000819	0	inf	3e-06	0.0024
X_B	SSF57586	Superfamily		13	15878	13	42168	0.000819	0	inf	3e-06	0.0024
X_B	1.20.120.550	Gene3D		28	15878	37	42168	0.001763	0.000342	2.36491	3e-06	0.0029
X_B	SSF161084	Superfamily		28	15878	37	42168	0.001763	0.000342	2.36491	3e-06	0.0029
X_B	1.20.5.340	Gene3D		27	15878	35	42168	0.0017	0.000304	2.48237	4e-06	0.0031
X_B	3.40.50.2000	Gene3D		38	15878	55	42168	0.002393	0.000647	1.88795	4e-06	0.0032
X_B	PTHR23324	PANTHER		17	15878	19	42168	0.001071	7.6e-05	3.81495	4e-06	0.0034
X_B	PTHR23324:SF52	PANTHER		17	15878	19	42168	0.001071	7.6e-05	3.81495	4e-06	0.0034
X_B	PTHR23339:SF57	PANTHER		15	15878	16	42168	0.000945	3.8e-05	4.63438	4e-06	0.0037
X_B	PTHR24083	PANTHER		15	15878	16	42168	0.000945	3.8e-05	4.63438	4e-06	0.0037
X_B	SSF53448	Superfamily	Nucleotide-diphospho-sugar transferases	16	15878	98	42168	0.001008	0.003119	-1.63007	5e-06	0.0042
X_B	PTHR15597	PANTHER		30	15878	41	42168	0.001889	0.000418	2.17494	5e-06	0.0043
X_B	SM00408	Smart	Immunoglobulin subtype 2	103	15878	386	42168	0.006487	0.010765	-0.730673	5e-06	0.0043
X_B	SSF56784	Superfamily	HAD-like domain	0	15878	26	42168	0	0.000989	-inf	6e-06	0.0046
X_B	PTHR13814	PANTHER		20	15878	24	42168	0.00126	0.000152	3.04941	6e-06	0.0047
X_B	SSF46579	Superfamily	Prefoldin	20	15878	24	42168	0.00126	0.000152	3.04941	6e-06	0.0047
X_B	PF00273	Pfam	Serum albumin, N-terminal	29	15878	39	42168	0.001826	0.00038	2.26354	6e-06	0.005
X_B	PS51438	Prosite_profiles	Serum albumin, N-terminal	29	15878	39	42168	0.001826	0.00038	2.26354	6e-06	0.005
X_B	PTHR11461:SF150	PANTHER		29	15878	39	42168	0.001826	0.00038	2.26354	6e-06	0.005
X_B	PTHR11521	PANTHER		29	15878	39	42168	0.001826	0.00038	2.26354	6e-06	0.005
X_B	SM00103	Smart	Serum albumin, N-terminal	29	15878	39	42168	0.001826	0.00038	2.26354	6e-06	0.005
X_B	PTHR11442	PANTHER		23	15878	29	42168	0.001449	0.000228	2.66608	7e-06	0.0056
X_B	PS01033	Prosite_profiles	Globin	26	15878	34	42168	0.001637	0.000304	2.42793	7e-06	0.0057
X_B	PS51529	Prosite_profiles	Fetuin-A-type cystatin domain	26	15878	34	42168	0.001637	0.000304	2.42793	7e-06	0.0057
X_B	SSF46458	Superfamily	Globin-like	26	15878	34	42168	0.001637	0.000304	2.42793	7e-06	0.0057
X_B	PF00756	Pfam	Putative esterase	12	15878	12	42168	0.000756	0	inf	8e-06	0.0062
X_B	PIRSF002527	PIRSF	Oestrogen receptor/oestrogen-related receptor	12	15878	12	42168	0.000756	0	inf	8e-06	0.0062
X_B	PIRSF037932	PIRSF	RNA binding protein Fox-1	24	15878	31	42168	0.001512	0.000266	2.50509	8e-06	0.0062
X_B	PIRSF500939	PIRSF	Oestrogen-related receptor	12	15878	12	42168	0.000756	0	inf	8e-06	0.0062
X_B	PR00100	PRINTS	Aspartate/ornithine carbamoyltransferase	12	15878	12	42168	0.000756	0	inf	8e-06	0.0062
X_B	PTHR10061	PANTHER		12	15878	12	42168	0.000756	0	inf	8e-06	0.0062
X_B	PTHR10638	PANTHER		12	15878	12	42168	0.000756	0	inf	8e-06	0.0062
X_B	PTHR10638:SF23	PANTHER		12	15878	12	42168	0.000756	0	inf	8e-06	0.0062
X_B	PTHR11635:SF126	PANTHER		12	15878	12	42168	0.000756	0	inf	8e-06	0.0062
X_B	PTHR14225	PANTHER		12	15878	12	42168	0.000756	0	inf	8e-06	0.0062
X_B	PTHR14225:SF0	PANTHER		12	15878	12	42168	0.000756	0	inf	8e-06	0.0062
X_B	PTHR23050:SF51	PANTHER		12	15878	12	42168	0.000756	0	inf	8e-06	0.0062
X_B	PTHR24052	PANTHER		12	15878	12	42168	0.000756	0	inf	8e-06	0.0062
X_B	PTHR24052:SF10	PANTHER		12	15878	12	42168	0.000756	0	inf	8e-06	0.0062
X_B	PTHR24084:SF23	PANTHER		12	15878	12	42168	0.000756	0	inf	8e-06	0.0062
X_B	TIGR02821	TIGRfam	S-formylglutathione hydrolase	12	15878	12	42168	0.000756	0	inf	8e-06	0.0062
X_B	PF05197	Pfam	TRIC channel	18	15878	21	42168	0.001134	0.000114	3.31245	8e-06	0.0083
X_B	PTHR12454	PANTHER		18	15878	21	42168	0.001134	0.000114	3.31245	8e-06	0.0083
X_B	PTHR31514	PANTHER		18	15878	21	42168	0.001134	0.000114	3.31245	8e-06	0.0083
X_B	PTHR31514:SF1	PANTHER		18	15878	21	42168	0.001134	0.000114	3.31245	8e-06	0.0083
X_B	PS00108	Prosite_patterns	Serine/threonine-protein kinase, active site	19	15878	108	42168	0.001197	0.003385	-1.50032	9e-06	0.0088
X_B	PF00566	Pfam	Rab-GTPase-TBC domain	2	15878	37	42168	0.000126	0.001331	-3.4018	1e-05	0.0093
X_B	SM00164	Smart	Rab-GTPase-TBC domain	0	15878	25	42168	0	0.000951	-inf	1e-05	0.0094
X_B	PF00650	Pfam	CRAL-TRIO lipid binding domain	16	15878	18	42168	0.001008	7.6e-05	3.72749	1e-05	0.0098
X_B	PS01255	Prosite_patterns	Proteinase inhibitor I25C, fetuin, conserved site	16	15878	18	42168	0.001008	7.6e-05	3.72749	1e-05	0.0098
X_B	PTHR12136	PANTHER		16	15878	18	42168	0.001008	7.6e-05	3.72749	1e-05	0.0098
X_B	3.40.50.1370	Gene3D		14	15878	15	42168	0.000882	3.8e-05	4.53484	1.1e-05	0.0105
X_B	PR01282	PRINTS	Transcription factor COUP	14	15878	15	42168	0.000882	3.8e-05	4.53484	1.1e-05	0.0105
X_B	PS51316	Prosite_profiles	Neuroblastoma breakpoint family (NBPF) domain	14	15878	15	42168	0.000882	3.8e-05	4.53484	1.1e-05	0.0105
X_B	1.25.40.20	Gene3D		49	15878	210	42168	0.003086	0.006124	-0.988722	1.2e-05	0.0115
X_B	PS50238	Prosite_profiles	Rho GTPase-activating protein domain	4	15878	46	42168	0.000252	0.001598	-2.66483	1.2e-05	0.0116
X_B	1.10.287.370	Gene3D		19	15878	23	42168	0.001197	0.000152	2.97541	1.3e-05	0.0124
X_B	2.60.40.200	Gene3D		19	15878	23	42168	0.001197	0.000152	2.97541	1.3e-05	0.0124
X_B	PF00080	Pfam	Superoxide dismutase, copper/zinc binding domain	19	15878	23	42168	0.001197	0.000152	2.97541	1.3e-05	0.0124
X_B	SSF49329	Superfamily	Superoxide dismutase, copper/zinc binding domain	19	15878	23	42168	0.001197	0.000152	2.97541	1.3e-05	0.0124
X_B	PTHR11385	PANTHER		21	15878	26	42168	0.001323	0.00019	2.79787	1.3e-05	0.0129
X_B	PTHR23055	PANTHER		22	15878	28	42168	0.001386	0.000228	2.60195	1.4e-05	0.0131
X_B	SM00043	Smart	Cystatin domain	40	15878	61	42168	0.002519	0.000799	1.6571	1.4e-05	0.0136
X_B	PR01686	PRINTS	Cytochrome P450, E-class, group I, CYP2D-like	46	15878	73	42168	0.002897	0.001027	1.49616	1.5e-05	0.0138
X_B	SSF50370	Superfamily	Ricin B, lectin domain	0	15878	24	42168	0	0.000913	-inf	1.8e-05	0.0155
X_B	PTHR11385:SF11	PANTHER		17	15878	20	42168	0.001071	0.000114	3.22999	1.9e-05	0.0166
X_B	SSF55620	Superfamily		17	15878	20	42168	0.001071	0.000114	3.22999	1.9e-05	0.0166
X_B	SSF48403	Superfamily	Ankyrin repeat-containing domain	43	15878	188	42168	0.002708	0.005515	-1.02616	2.1e-05	0.0186
X_B	PF00185	Pfam	Aspartate/ornithine carbamoyltransferase, Asp/Orn-binding domain	11	15878	11	42168	0.000693	0	inf	2.2e-05	0.0187
X_B	PF00235	Pfam	Profilin	11	15878	11	42168	0.000693	0	inf	2.2e-05	0.0187
X_B	PF03179	Pfam		11	15878	11	42168	0.000693	0	inf	2.2e-05	0.0187
X_B	PR00102	PRINTS	Ornithine/putrescine carbamoyltransferase	11	15878	11	42168	0.000693	0	inf	2.2e-05	0.0187
X_B	PR00392	PRINTS	Profilin	11	15878	11	42168	0.000693	0	inf	2.2e-05	0.0187
X_B	PR01639	PRINTS	Profilin1/2/3, vertebrate	11	15878	11	42168	0.000693	0	inf	2.2e-05	0.0187
X_B	PS00768	Prosite_patterns	Transthyretin, thyroxine binding site	11	15878	11	42168	0.000693	0	inf	2.2e-05	0.0187
X_B	PTHR12713	PANTHER		11	15878	11	42168	0.000693	0	inf	2.2e-05	0.0187
X_B	PTHR12713:SF12	PANTHER		11	15878	11	42168	0.000693	0	inf	2.2e-05	0.0187
X_B	PTHR13936	PANTHER		11	15878	11	42168	0.000693	0	inf	2.2e-05	0.0187
X_B	PTHR13936:SF13	PANTHER		11	15878	11	42168	0.000693	0	inf	2.2e-05	0.0187
X_B	PTHR15301:SF10	PANTHER		11	15878	11	42168	0.000693	0	inf	2.2e-05	0.0187
X_B	SM00392	Smart	Profilin	11	15878	11	42168	0.000693	0	inf	2.2e-05	0.0187
X_B	SSF55770	Superfamily	Profilin	11	15878	11	42168	0.000693	0	inf	2.2e-05	0.0187
X_B	TIGR01147	TIGRfam	Vacuolar (H+)-ATPase G subunit	11	15878	11	42168	0.000693	0	inf	2.2e-05	0.0187
X_B	SSF47923	Superfamily	Rab-GTPase-TBC domain	5	15878	49	42168	0.000315	0.001674	-2.41002	2.3e-05	0.0198
X_B	MF_01966	HAMAP		15	15878	17	42168	0.000945	7.6e-05	3.63438	2.5e-05	0.0207
X_B	PR00978	PRINTS	Steroidogenic acute regulatory protein-like	15	15878	17	42168	0.000945	7.6e-05	3.63438	2.5e-05	0.0207
X_B	PTHR13232:SF11	PANTHER		15	15878	17	42168	0.000945	7.6e-05	3.63438	2.5e-05	0.0207
X_B	SM00503	Smart	Syntaxin, N-terminal domain	15	15878	17	42168	0.000945	7.6e-05	3.63438	2.5e-05	0.0207
X_B	PR00068	PRINTS	Superoxide dismutase, copper/zinc binding domain	20	15878	25	42168	0.00126	0.00019	2.72749	2.6e-05	0.0236
X_B	SSF53649	Superfamily	Alkaline-phosphatase-like, core domain	2	15878	35	42168	0.000126	0.001255	-3.31691	2.7e-05	0.024
X_B	SM00831	Smart	Cation-transporting P-type ATPase, N-terminal	13	15878	14	42168	0.000819	3.8e-05	4.42793	2.8e-05	0.0242
X_B	SSF51182	Superfamily	RmlC-like cupin domain	32	15878	47	42168	0.002015	0.000571	1.82059	2.9e-05	0.0303
X_B	PTHR10003	PANTHER		18	15878	22	42168	0.001134	0.000152	2.89741	2.9e-05	0.031
X_B	PTHR11799:SF3	PANTHER		18	15878	22	42168	0.001134	0.000152	2.89741	2.9e-05	0.031
X_B	PTHR13814:SF6	PANTHER		18	15878	22	42168	0.001134	0.000152	2.89741	2.9e-05	0.031
X_B	SSF48350	Superfamily	Rho GTPase activation protein	7	15878	58	42168	0.000441	0.00194	-2.13759	3e-05	0.0318
X_B	SM00324	Smart	Rho GTPase-activating protein domain	4	15878	44	42168	0.000252	0.001521	-2.59444	3e-05	0.032
X_B	PTHR23050	PANTHER		31	15878	45	42168	0.001952	0.000533	1.87433	3.5e-05	0.0344
X_B	PS00086	Prosite_patterns	Cytochrome P450, conserved site	59	15878	102	42168	0.003716	0.001636	1.18386	3.6e-05	0.0355
X_B	SSF49265	Superfamily	Fibronectin type III	64	15878	253	42168	0.004031	0.007189	-0.834757	3.8e-05	0.0364
X_B	SM00322	Smart	K Homology domain	3	15878	39	42168	0.000189	0.001369	-2.85748	3.8e-05	0.0367
X_B	SM00451	Smart	Zinc finger, U1-type	3	15878	39	42168	0.000189	0.001369	-2.85748	3.8e-05	0.0367
X_B	SSF63748	Superfamily		3	15878	39	42168	0.000189	0.001369	-2.85748	3.8e-05	0.0367
X_B	PF00036	Pfam	EF-hand domain	16	15878	19	42168	0.001008	0.000114	3.14252	4.3e-05	0.0384
X_B	PF01127	Pfam	Succinate dehydrogenase/Fumarate reductase, transmembrane subunit	16	15878	19	42168	0.001008	0.000114	3.14252	4.3e-05	0.0384
X_B	PF01242	Pfam	6-pyruvoyl tetrahydropterin synthase/QueD family protein	16	15878	19	42168	0.001008	0.000114	3.14252	4.3e-05	0.0384
X_B	TIGR02970	TIGRfam	Succinate dehydrogenase, cytochrome b556 subunit	16	15878	19	42168	0.001008	0.000114	3.14252	4.3e-05	0.0384
X_B	SSF47661	Superfamily	t-SNARE	29	15878	42	42168	0.001826	0.000494	1.88503	4.3e-05	0.0405
X_B	SM00487	Smart	Helicase superfamily 1/2, ATP-binding domain	2	15878	33	42168	0.000126	0.001179	-3.22671	4.5e-05	0.0417
X_B	SSF48726	Superfamily	Immunoglobulin-like domain	170	15878	576	42168	0.010707	0.015443	-0.52846	4.5e-05	0.0417
X_B	PF04908	Pfam	SH3-binding, glutamic acid-rich protein	23	15878	31	42168	0.001449	0.000304	2.25105	4.7e-05	0.0434
X_B	PIRSF008142	PIRSF	SH3-binding, glutamic acid-rich protein	23	15878	31	42168	0.001449	0.000304	2.25105	4.7e-05	0.0434
X_B	SM00320	Smart	WD40 repeat	64	15878	251	42168	0.004031	0.007113	-0.81941	4.8e-05	0.0438
X_B	SSF47616	Superfamily	Glutathione S-transferase, C-terminal-like	41	15878	65	42168	0.002582	0.000913	1.50007	4.9e-05	0.0449
X_B	SSF48452	Superfamily		44	15878	187	42168	0.002771	0.005439	-0.972955	5.4e-05	0.0476
X_B	SM00028	Smart	Tetratricopeptide repeat	36	15878	160	42168	0.002267	0.004717	-1.05679	5.4e-05	0.0477
X_B	SSF53300	Superfamily	von Willebrand factor, type A	5	15878	47	42168	0.000315	0.001598	-2.3429	5.7e-05	0.0483
X_B	PF12698	Pfam		0	15878	21	42168	0	0.000799	-inf	5.7e-05	0.0484

## Sheet: C vs NC
Groups	PF	PF_Type	PF_Desc	x	k	N	M	x/k	(N-x)/(M-k)	log2(R+/R-)	P_value	E(P_value)
C_NC	2.40.128.20	Gene3D		1	6431	148	31113	0.000155	0.005956	-5.25933	0	0
C_NC	42228	Superfamily		2	6431	2	31113	0.000311	0	inf	0.042719	1
C_NC	42477	Superfamily		2	6431	2	31113	0.000311	0	inf	0.042719	1
C_NC	43277	Superfamily		2	6431	2	31113	0.000311	0	inf	0.042719	1
C_NC	44483	Superfamily		4	6431	4	31113	0.000622	0	inf	0.001824	0.874
C_NC	44500	Superfamily		2	6431	2	31113	0.000311	0	inf	0.042719	1
C_NC	SSF50814	Superfamily	Calycin-like	1	6431	146	31113	0.000155	0.005875	-5.23956	0	0
C_NC	SignalP-noTM	SignalP		106	6431	1054	31113	0.016483	0.038409	-1.22048	0	0
C_NC	49131	Superfamily		5	6431	7	31113	0.000777	8.1e-05	3.26227	0.00543	0.9979
C_NC	49182	Superfamily		2	6431	2	31113	0.000311	0	inf	0.042719	1
C_NC	seg	Seg		2662	6431	10629	31113	0.413933	0.322786	0.358818	0	0
C_NC	53200	Superfamily		2	6431	2	31113	0.000311	0	inf	0.042719	1
C_NC	53405	Superfamily		2	6431	2	31113	0.000311	0	inf	0.042719	1
C_NC	PF00061	Pfam	Lipocalin/cytosolic fatty-acid binding domain	1	6431	132	31113	0.000155	0.005308	-5.09308	0	0.0001
C_NC	53574	Superfamily		4	6431	6	31113	0.000622	8.1e-05	2.94034	0.019094	1
C_NC	PR00463	PRINTS	Cytochrome P450, E-class, group I	7	6431	198	31113	0.001088	0.007738	-2.82973	0	0.0001
C_NC	1.10.100.10	Gene3D		5	6431	9	31113	0.000777	0.000162	2.26227	0.022471	1
C_NC	PF00067	Pfam	Cytochrome P450	5	6431	166	31113	0.000777	0.006523	-3.06864	0	0.0002
C_NC	1.10.150.20	Gene3D		4	6431	7	31113	0.000622	0.000122	2.35538	0.037314	1
C_NC	1.10.150.250	Gene3D		2	6431	2	31113	0.000311	0	inf	0.042719	1
C_NC	1.10.630.10	Gene3D		5	6431	162	31113	0.000777	0.006361	-3.03235	0	0.0004
C_NC	SSF48264	Superfamily	Cytochrome P450	5	6431	162	31113	0.000777	0.006361	-3.03235	0	0.0004
C_NC	PF09738	Pfam	Leucine-rich repeat flightless-interacting protein	25	6431	36	31113	0.003887	0.000446	3.12477	0	0.0005
C_NC	TMhelix	Tmhmm		501	6431	3059	31113	0.077904	0.103638	-0.411789	0	0.0005
C_NC	PR00385	PRINTS	Cytochrome P450	7	6431	170	31113	0.001088	0.006604	-2.60103	0	0.0007
C_NC	2.10.70.10	Gene3D		4	6431	126	31113	0.000622	0.004943	-2.99039	0	0.0013
C_NC	PF12424	Pfam	Plasma membrane calcium transporting P-type ATPase, C-terminal	16	6431	20	31113	0.002488	0.000162	3.94034	0	0.0013
C_NC	1.20.120.230	Gene3D		3	6431	3	31113	0.000466	0	inf	0.008828	1
C_NC	PR00179	PRINTS	Lipocalin	1	6431	89	31113	0.000155	0.003565	-4.51909	0	0.0019
C_NC	PTHR11915	PANTHER		34	6431	67	31113	0.005287	0.001337	1.98341	0	0.0019
C_NC	PR01221	PRINTS	Major urinary protein	0	6431	74	31113	0	0.002998	-inf	0	0.0022
C_NC	1.20.142.10	Gene3D		2	6431	2	31113	0.000311	0	inf	0.042719	1
C_NC	PTHR24300	PANTHER		5	6431	128	31113	0.000777	0.004983	-2.68024	0	0.0026
C_NC	Coil	ncoils		642	6431	2606	31113	0.099829	0.079572	0.327195	0	0.0043
C_NC	SM00228	Smart	PDZ domain	48	6431	115	31113	0.007464	0.002715	1.45922	0	0.0044
C_NC	SSF57535	Superfamily	Sushi/SCR/CCP domain	4	6431	110	31113	0.000622	0.004295	-2.78758	0	0.0051
C_NC	PS01159	Prosite_patterns	WW domain	19	6431	30	31113	0.002954	0.000446	2.72884	0	0.0056
C_NC	PTHR11430:SF71	PANTHER		0	6431	64	31113	0	0.002593	-inf	1e-06	0.006
C_NC	1amlA00	Gene3D		3	6431	3	31113	0.000466	0	inf	0.008828	1
C_NC	1devB00	Gene3D		2	6431	2	31113	0.000311	0	inf	0.042719	1
C_NC	1dkgA01	Gene3D		2	6431	2	31113	0.000311	0	inf	0.042719	1
C_NC	1lshA01	Gene3D		3	6431	3	31113	0.000466	0	inf	0.008828	1
C_NC	PS50923	Prosite_profiles	Sushi/SCR/CCP domain	4	6431	107	31113	0.000622	0.004173	-2.74616	1e-06	0.0072
C_NC	PTHR11915:SF212	PANTHER		20	6431	34	31113	0.00311	0.000567	2.45492	1e-06	0.0087
C_NC	1t60D00	Gene3D		2	6431	2	31113	0.000311	0	inf	0.042719	1
C_NC	1uptF00	Gene3D		4	6431	5	31113	0.000622	4.1e-05	3.94034	0.007613	0.9999
C_NC	PTHR12751	PANTHER		13	6431	17	31113	0.002021	0.000162	3.64078	1e-06	0.0087
C_NC	SSF51045	Superfamily	WW domain	23	6431	43	31113	0.003576	0.00081	2.14198	2e-06	0.0124
C_NC	1vq8M00	Gene3D		2	6431	2	31113	0.000311	0	inf	0.042719	1
C_NC	SM00043	Smart	Cystatin domain	0	6431	59	31113	0	0.00239	-inf	2e-06	0.0128
C_NC	SSF50156	Superfamily	PDZ domain	49	6431	126	31113	0.007619	0.00312	1.28827	3e-06	0.0139
C_NC	2.10.220.10	Gene3D		7	6431	9	31113	0.001088	8.1e-05	3.7477	0.000389	0.3601
C_NC	PF00084	Pfam	Sushi/SCR/CCP domain	4	6431	100	31113	0.000622	0.003889	-2.64462	3e-06	0.0149
C_NC	2.102.10.10	Gene3D		3	6431	3	31113	0.000466	0	inf	0.008828	1
C_NC	SM00032	Smart	Sushi/SCR/CCP domain	4	6431	100	31113	0.000622	0.003889	-2.64462	3e-06	0.0149
C_NC	2.30.30.160	Gene3D		4	6431	6	31113	0.000622	8.1e-05	2.94034	0.019094	1
C_NC	PS50106	Prosite_profiles	PDZ domain	46	6431	117	31113	0.007153	0.002877	1.31416	5e-06	0.02
C_NC	2.20.70.10	Gene3D		22	6431	42	31113	0.003421	0.00081	2.07785	5e-06	0.0208
C_NC	PTHR11430	PANTHER		1	6431	67	31113	0.000155	0.002674	-4.10405	6e-06	0.0215
C_NC	2.30.42.10	Gene3D		49	6431	129	31113	0.007619	0.003241	1.23313	6e-06	0.0218
C_NC	PF00651	Pfam	BTB/POZ domain	29	6431	63	31113	0.004509	0.001378	1.71086	6e-06	0.0222
C_NC	PF00595	Pfam	PDZ domain	43	6431	108	31113	0.006686	0.002633	1.34424	6e-06	0.0231
C_NC	3.40.50.2000	Gene3D		0	6431	52	31113	0	0.002107	-inf	8e-06	0.0255
C_NC	3.10.450.10	Gene3D		0	6431	53	31113	0	0.002147	-inf	9e-06	0.026
C_NC	PS50020	Prosite_profiles	WW domain	21	6431	40	31113	0.003265	0.00077	2.08473	9e-06	0.0261
C_NC	PF00397	Pfam	WW domain	19	6431	35	31113	0.002954	0.000648	2.18827	1.2e-05	0.0321
C_NC	SM00456	Smart	WW domain	19	6431	35	31113	0.002954	0.000648	2.18827	1.2e-05	0.0321
C_NC	2.60.300.12	Gene3D		2	6431	2	31113	0.000311	0	inf	0.042719	1
C_NC	PTHR19212	PANTHER		12	6431	17	31113	0.001866	0.000203	3.20338	1.3e-05	0.0339
C_NC	SSF54403	Superfamily		0	6431	51	31113	0	0.002066	-inf	1.3e-05	0.0361
C_NC	PS00086	Prosite_patterns	Cytochrome P450, conserved site	4	6431	92	31113	0.000622	0.003565	-2.51909	1.4e-05	0.0367
C_NC	2k1aA00	Gene3D		6	6431	9	31113	0.000933	0.000122	2.94034	0.003655	0.981
C_NC	3.10.130.10	Gene3D		2	6431	2	31113	0.000311	0	inf	0.042719	1
C_NC	PF00642	Pfam	Zinc finger, CCCH-type	11	6431	15	31113	0.00171	0.000162	3.39978	1.7e-05	0.0437
C_NC	PF01391	Pfam	Collagen triple helix repeat	4	6431	90	31113	0.000622	0.003484	-2.48592	2.1e-05	0.0491
C_NC	3.10.400.10	Gene3D		4	6431	6	31113	0.000622	8.1e-05	2.94034	0.019094	1
C_NC	PF15222	Pfam	Kidney androgen-regulated protein	0	6431	48	31113	0	0.001945	-inf	2.1e-05	0.0494
C_NC	3.10.580.10	Gene3D		6	6431	9	31113	0.000933	0.000122	2.94034	0.003655	0.981
C_NC	3.30.1120.10	Gene3D		3	6431	4	31113	0.000466	4.1e-05	3.52531	0.029839	1
C_NC	3.30.479.10	Gene3D		4	6431	5	31113	0.000622	4.1e-05	3.94034	0.007613	0.9999
C_NC	3.30.540.10	Gene3D		4	6431	7	31113	0.000622	0.000122	2.35538	0.037314	1
C_NC	3.30.63.10	Gene3D		3	6431	3	31113	0.000466	0	inf	0.008828	1
C_NC	3.30.890.10	Gene3D		7	6431	7	31113	0.001088	0	inf	1.6e-05	0.0431
C_NC	3.40.1380.20	Gene3D		2	6431	2	31113	0.000311	0	inf	0.042719	1
C_NC	3.40.50.20	Gene3D		2	6431	2	31113	0.000311	0	inf	0.042719	1
C_NC	3.90.228.10	Gene3D		5	6431	6	31113	0.000777	4.1e-05	4.26227	0.001872	0.894
C_NC	3.90.960.10	Gene3D		2	6431	2	31113	0.000311	0	inf	0.042719	1
C_NC	MF_00956	HAMAP		4	6431	4	31113	0.000622	0	inf	0.001824	0.874
C_NC	MF_00972	HAMAP		2	6431	2	31113	0.000311	0	inf	0.042719	1
C_NC	MF_01116	HAMAP		3	6431	4	31113	0.000466	4.1e-05	3.52531	0.029839	1
C_NC	MF_03057	HAMAP		2	6431	2	31113	0.000311	0	inf	0.042719	1
C_NC	PF00049	Pfam	Insulin-like	5	6431	9	31113	0.000777	0.000162	2.26227	0.022471	1
C_NC	PF00052	Pfam	Laminin IV	3	6431	4	31113	0.000466	4.1e-05	3.52531	0.029839	1
C_NC	PF00066	Pfam	Notch domain	2	6431	2	31113	0.000311	0	inf	0.042719	1
C_NC	PF00074	Pfam	Ribonuclease A-domain	2	6431	2	31113	0.000311	0	inf	0.042719	1
C_NC	PF00167	Pfam		5	6431	9	31113	0.000777	0.000162	2.26227	0.022471	1
C_NC	PF00459	Pfam	Inositol monophosphatase	3	6431	3	31113	0.000466	0	inf	0.008828	1
C_NC	PF00479	Pfam	Glucose-6-phosphate dehydrogenase, NAD-binding	3	6431	4	31113	0.000466	4.1e-05	3.52531	0.029839	1
C_NC	PF00637	Pfam	Clathrin, heavy chain/VPS, 7-fold repeat	2	6431	2	31113	0.000311	0	inf	0.042719	1
C_NC	PF00639	Pfam	Peptidyl-prolyl cis-trans isomerase, PpiC-type	4	6431	4	31113	0.000622	0	inf	0.001824	0.874
C_NC	PF00641	Pfam	Zinc finger, RanBP2-type	3	6431	3	31113	0.000466	0	inf	0.008828	1
C_NC	PF00644	Pfam	Poly(ADP-ribose) polymerase, catalytic domain	5	6431	6	31113	0.000777	4.1e-05	4.26227	0.001872	0.894
C_NC	PF00778	Pfam	DIX domain	3	6431	3	31113	0.000466	0	inf	0.008828	1
C_NC	PF00806	Pfam	Pumilio RNA-binding repeat	2	6431	2	31113	0.000311	0	inf	0.042719	1
C_NC	PF00827	Pfam	Ribosomal protein L15e	2	6431	2	31113	0.000311	0	inf	0.042719	1
C_NC	PF00849	Pfam	Pseudouridine synthase, RsuA/RluB/C/D/E/F	2	6431	2	31113	0.000311	0	inf	0.042719	1
C_NC	PF00855	Pfam	PWWP domain	4	6431	6	31113	0.000622	8.1e-05	2.94034	0.019094	1
C_NC	PF01133	Pfam	Enhancer of rudimentary	2	6431	2	31113	0.000311	0	inf	0.042719	1
C_NC	PF01202	Pfam	Shikimate kinase/gluconokinase	4	6431	6	31113	0.000622	8.1e-05	2.94034	0.019094	1
C_NC	PF01207	Pfam	tRNA-dihydrouridine synthase	4	6431	6	31113	0.000622	8.1e-05	2.94034	0.019094	1
C_NC	PF01410	Pfam	Fibrillar collagen, C-terminal	2	6431	2	31113	0.000311	0	inf	0.042719	1
C_NC	PF01426	Pfam	Bromo adjacent homology (BAH) domain	3	6431	3	31113	0.000466	0	inf	0.008828	1
C_NC	PF01429	Pfam	Methyl-CpG DNA binding	7	6431	7	31113	0.001088	0	inf	1.6e-05	0.0431
C_NC	PF01465	Pfam	GRIP	4	6431	5	31113	0.000622	4.1e-05	3.94034	0.007613	0.9999
C_NC	PF01483	Pfam	Proprotein convertase, P	6	6431	8	31113	0.000933	8.1e-05	3.52531	0.001478	0.8118
C_NC	PF01521	Pfam	FeS cluster biogenesis	2	6431	2	31113	0.000311	0	inf	0.042719	1
C_NC	PF01608	Pfam	I/LWEQ domain	2	6431	2	31113	0.000311	0	inf	0.042719	1
C_NC	PF01733	Pfam	Equilibrative nucleoside transporter	2	6431	2	31113	0.000311	0	inf	0.042719	1
C_NC	PF01779	Pfam	Ribosomal protein L29e	2	6431	2	31113	0.000311	0	inf	0.042719	1
C_NC	PF01853	Pfam	Histone acetyltransferase domain, MYST-type	2	6431	2	31113	0.000311	0	inf	0.042719	1
C_NC	PF01885	Pfam	Phosphotransferase KptA/Tpt1	4	6431	5	31113	0.000622	4.1e-05	3.94034	0.007613	0.9999
C_NC	PF01940	Pfam	Protein of unknown function DUF92, TMEM19	2	6431	2	31113	0.000311	0	inf	0.042719	1
C_NC	PF02136	Pfam	Nuclear transport factor 2	4	6431	6	31113	0.000622	8.1e-05	2.94034	0.019094	1
C_NC	PF02178	Pfam	AT hook, DNA-binding motif	3	6431	3	31113	0.000466	0	inf	0.008828	1
C_NC	PF02185	Pfam	HR1 rho-binding repeat	3	6431	4	31113	0.000466	4.1e-05	3.52531	0.029839	1
C_NC	PF02259	Pfam	PIK-related kinase, FAT	4	6431	4	31113	0.000622	0	inf	0.001824	0.874
C_NC	PF02354	Pfam	GPCR, family 2, latrophilin, C-terminal	4	6431	6	31113	0.000622	8.1e-05	2.94034	0.019094	1
C_NC	PF02743	Pfam	Cache domain	5	6431	9	31113	0.000777	0.000162	2.26227	0.022471	1
C_NC	PF02844	Pfam	Phosphoribosylglycinamide synthetase, N-terminal	2	6431	2	31113	0.000311	0	inf	0.042719	1
C_NC	PF02877	Pfam	Poly(ADP-ribose) polymerase, regulatory domain	2	6431	2	31113	0.000311	0	inf	0.042719	1
C_NC	PF02887	Pfam	Pyruvate kinase, C-terminal	2	6431	2	31113	0.000311	0	inf	0.042719	1
C_NC	PF03446	Pfam	6-phosphogluconate dehydrogenase, NADP-binding	2	6431	2	31113	0.000311	0	inf	0.042719	1
C_NC	PF03494	Pfam	Amyloidogenic glycoprotein, amyloid-beta peptide	3	6431	3	31113	0.000466	0	inf	0.008828	1
C_NC	PF03577	Pfam	Peptidase C69, dipeptidase A	2	6431	2	31113	0.000311	0	inf	0.042719	1
C_NC	PF03623	Pfam	Focal adhesion kinase, targeting (FAT) domain	2	6431	2	31113	0.000311	0	inf	0.042719	1
C_NC	PF03937	Pfam	Flavinator of succinate dehydrogenase	2	6431	2	31113	0.000311	0	inf	0.042719	1
C_NC	PF03987	Pfam	Autophagy-related protein 3	3	6431	3	31113	0.000466	0	inf	0.008828	1
C_NC	PF04034	Pfam	Domain of unknown function DUF367	3	6431	4	31113	0.000466	4.1e-05	3.52531	0.029839	1
C_NC	PF04073	Pfam	YbaK/aminoacyl-tRNA synthetase-associated domain	2	6431	2	31113	0.000311	0	inf	0.042719	1
C_NC	PF04188	Pfam	GPI mannosyltransferase 2	3	6431	3	31113	0.000466	0	inf	0.008828	1
C_NC	PF04201	Pfam	Tumour protein D52	8	6431	8	31113	0.001244	0	inf	3e-06	0.0171
C_NC	PF04503	Pfam		5	6431	9	31113	0.000777	0.000162	2.26227	0.022471	1
C_NC	PF04547	Pfam	Anoctamin	2	6431	2	31113	0.000311	0	inf	0.042719	1
C_NC	PF04549	Pfam	CD47 transmembrane	2	6431	2	31113	0.000311	0	inf	0.042719	1
C_NC	PF04571	Pfam	Lipin, N-terminal	4	6431	4	31113	0.000622	0	inf	0.001824	0.874
C_NC	PF04857	Pfam	Ribonuclease CAF1	2	6431	2	31113	0.000311	0	inf	0.042719	1
C_NC	PF05049	Pfam	Immunity-related GTPases-like	5	6431	9	31113	0.000777	0.000162	2.26227	0.022471	1
C_NC	PF05104	Pfam	Ribosome receptor lysine/proline rich	2	6431	2	31113	0.000311	0	inf	0.042719	1
C_NC	PF05279	Pfam	Aspartyl beta-hydroxylase/Triadin domain	4	6431	4	31113	0.000622	0	inf	0.001824	0.874
C_NC	PF05460	Pfam	Origin recognition complex, subunit 6	3	6431	3	31113	0.000466	0	inf	0.008828	1
C_NC	PF05502	Pfam	Dynactin subunit 4	2	6431	2	31113	0.000311	0	inf	0.042719	1
C_NC	PF05624	Pfam	LISCH7	3	6431	3	31113	0.000466	0	inf	0.008828	1
C_NC	PF05839	Pfam	Apc13p	3	6431	4	31113	0.000466	4.1e-05	3.52531	0.029839	1
C_NC	PF05934	Pfam	Chloride channel CLIC-like	2	6431	2	31113	0.000311	0	inf	0.042719	1
C_NC	PF06008	Pfam	Laminin alpha, domain I	2	6431	2	31113	0.000311	0	inf	0.042719	1
C_NC	PF06121	Pfam	Domain of unknown function DUF959, collagen XVIII, N-terminal	2	6431	2	31113	0.000311	0	inf	0.042719	1
C_NC	PF06159	Pfam	Protein of unknown function DUF974	3	6431	4	31113	0.000466	4.1e-05	3.52531	0.029839	1
C_NC	PF06371	Pfam	Formin, GTPase-binding domain	2	6431	2	31113	0.000311	0	inf	0.042719	1
C_NC	PF06567	Pfam	Neural chondroitin sulphate proteoglycan cytoplasmic	2	6431	2	31113	0.000311	0	inf	0.042719	1
C_NC	PF06583	Pfam	Neogenin, C-terminal	4	6431	4	31113	0.000622	0	inf	0.001824	0.874
C_NC	PF06816	Pfam	Notch, NOD domain	2	6431	2	31113	0.000311	0	inf	0.042719	1
C_NC	PF07496	Pfam	Zinc finger, CW-type	4	6431	4	31113	0.000622	0	inf	0.001824	0.874
C_NC	PF07855	Pfam	Autophagy-related protein 1010	2	6431	2	31113	0.000311	0	inf	0.042719	1
C_NC	PF08016	Pfam	Polycystin cation channel, PKD1/PKD2	3	6431	4	31113	0.000466	4.1e-05	3.52531	0.029839	1
C_NC	PF08239	Pfam	SH3-like domain, bacterial-type	3	6431	3	31113	0.000466	0	inf	0.008828	1
C_NC	PF08368	Pfam	FAST kinase-like protein, subdomain 2	2	6431	2	31113	0.000311	0	inf	0.042719	1
C_NC	PF08454	Pfam	RyR/IP3R Homology associated domain	2	6431	2	31113	0.000311	0	inf	0.042719	1
C_NC	PF08626	Pfam	TRAPP II complex, Trs120	4	6431	4	31113	0.000622	0	inf	0.001824	0.874
C_NC	PF08726	Pfam	EF-hand, Ca insensitive	3	6431	3	31113	0.000466	0	inf	0.008828	1
C_NC	PF08913	Pfam	Vinculin-binding site-containing domain	4	6431	4	31113	0.000622	0	inf	0.001824	0.874
C_NC	PF09282	Pfam	WIBG family	2	6431	2	31113	0.000311	0	inf	0.042719	1
C_NC	PF09296	Pfam	NADH pyrophosphatase-like, N-terminal	4	6431	5	31113	0.000622	4.1e-05	3.94034	0.007613	0.9999
C_NC	PF09297	Pfam	Zinc ribbon, NADH pyrophosphatase	3	6431	3	31113	0.000466	0	inf	0.008828	1
C_NC	PF09402	Pfam	Inner nuclear membrane protein MAN1	4	6431	4	31113	0.000622	0	inf	0.001824	0.874
C_NC	PF09469	Pfam	Cordon-bleu, ubiquitin-like domain	4	6431	4	31113	0.000622	0	inf	0.001824	0.874
C_NC	PF09606	Pfam	Mediator complex, subunit Med15	2	6431	2	31113	0.000311	0	inf	0.042719	1
C_NC	PF09751	Pfam	Nuclear protein DGCR14	2	6431	2	31113	0.000311	0	inf	0.042719	1
C_NC	PF09768	Pfam	Peptidase M76, ATP23	3	6431	3	31113	0.000466	0	inf	0.008828	1
C_NC	PF09791	Pfam	Oxidoreductase-like, N-terminal	2	6431	2	31113	0.000311	0	inf	0.042719	1
C_NC	PF10165	Pfam	Guanine nucleotide exchange factor, Ric8	4	6431	5	31113	0.000622	4.1e-05	3.94034	0.007613	0.9999
C_NC	PF10166	Pfam	Protein of unknown function DUF2368	4	6431	5	31113	0.000622	4.1e-05	3.94034	0.007613	0.9999
C_NC	PF10251	Pfam	Gamma-secretase aspartyl protease complex, presenilin enhancer-2 subunit	2	6431	2	31113	0.000311	0	inf	0.042719	1
C_NC	PF10496	Pfam	SNARE-complex protein Syntaxin-18, N-terminal	2	6431	2	31113	0.000311	0	inf	0.042719	1
C_NC	PF11409	Pfam	Smad anchor for receptor activation, Smad-binding domain	2	6431	2	31113	0.000311	0	inf	0.042719	1
C_NC	PF11717	Pfam	RNA binding activity-knot of a chromodomain	4	6431	5	31113	0.000622	4.1e-05	3.94034	0.007613	0.9999
C_NC	PF11789	Pfam		3	6431	4	31113	0.000466	4.1e-05	3.52531	0.029839	1
C_NC	PF11881	Pfam	Signal-induced proliferation-associated 1-like protein, C-terminal	5	6431	9	31113	0.000777	0.000162	2.26227	0.022471	1
C_NC	PF11916	Pfam	Vacuolar protein 14 C-terminal Fig4-binding domain	2	6431	2	31113	0.000311	0	inf	0.042719	1
C_NC	PF11971	Pfam	Calmodulin-regulated spectrin-associated protein, CH domain	4	6431	4	31113	0.000622	0	inf	0.001824	0.874
C_NC	PF11979	Pfam	Domain of unknown function DUF3480	2	6431	2	31113	0.000311	0	inf	0.042719	1
C_NC	PF12003	Pfam		4	6431	4	31113	0.000622	0	inf	0.001824	0.874
C_NC	PF12052	Pfam	Voltage-dependent calcium channel, L-type, beta subunit	2	6431	2	31113	0.000311	0	inf	0.042719	1
C_NC	PF12185	Pfam	Nup358/RanBP2 E3 ligase domain	3	6431	3	31113	0.000466	0	inf	0.008828	1
C_NC	PF12347	Pfam	Holliday junction regulator protein family C-terminal	5	6431	8	31113	0.000777	0.000122	2.67731	0.012018	1
C_NC	PF12448	Pfam	Trafficking kinesin-binding protein domain	4	6431	6	31113	0.000622	8.1e-05	2.94034	0.019094	1
C_NC	PF12490	Pfam	Breast carcinoma amplified sequence 3	3	6431	3	31113	0.000466	0	inf	0.008828	1
C_NC	PF13426	Pfam	PAS domain	3	6431	3	31113	0.000466	0	inf	0.008828	1
C_NC	PF13659	Pfam		2	6431	2	31113	0.000311	0	inf	0.042719	1
C_NC	PF13771	Pfam		6	6431	7	31113	0.000933	4.1e-05	4.52531	0.000448	0.391
C_NC	PF13806	Pfam		3	6431	3	31113	0.000466	0	inf	0.008828	1
C_NC	PF13865	Pfam	Friend of PRMT1 duplication	4	6431	5	31113	0.000622	4.1e-05	3.94034	0.007613	0.9999
C_NC	PF13911	Pfam		5	6431	9	31113	0.000777	0.000162	2.26227	0.022471	1
C_NC	PF14306	Pfam	ATP-sulfurylase PUA-like domain	4	6431	6	31113	0.000622	8.1e-05	2.94034	0.019094	1
C_NC	PF14443	Pfam	DBC1/CARP1 catalytically inactive NUDIX hydrolase domain	5	6431	7	31113	0.000777	8.1e-05	3.26227	0.00543	0.9979
C_NC	PF14497	Pfam	Glutathione S-transferase, C-terminal	3	6431	4	31113	0.000466	4.1e-05	3.52531	0.029839	1
C_NC	PF14843	Pfam		4	6431	6	31113	0.000622	8.1e-05	2.94034	0.019094	1
C_NC	PF14960	Pfam		2	6431	2	31113	0.000311	0	inf	0.042719	1
C_NC	PF14975	Pfam	Uncharacterised protein family UPF0729	4	6431	6	31113	0.000622	8.1e-05	2.94034	0.019094	1
C_NC	PF14998	Pfam	Ripply family	2	6431	2	31113	0.000311	0	inf	0.042719	1
C_NC	PF15128	Pfam	T-cell leukemia translocation-altered gene protein	2	6431	2	31113	0.000311	0	inf	0.042719	1
C_NC	PF15134	Pfam	Protein of unknown function DUF4570	7	6431	7	31113	0.001088	0	inf	1.6e-05	0.0431
C_NC	PF15242	Pfam	Family of FAM53	3	6431	3	31113	0.000466	0	inf	0.008828	1
C_NC	PF15245	Pfam	Transcription cofactor vestigial-like protein 4	2	6431	2	31113	0.000311	0	inf	0.042719	1
C_NC	PF15258	Pfam	Protein FAM222	2	6431	2	31113	0.000311	0	inf	0.042719	1
C_NC	PF15260	Pfam	Protein FAM219	2	6431	2	31113	0.000311	0	inf	0.042719	1
C_NC	PF15279	Pfam	Retinoic acid-induced protein 2/sine oculis-binding protein homologue	3	6431	3	31113	0.000466	0	inf	0.008828	1
C_NC	PF15300	Pfam	INTS6/SAGE1/DDX26B/CT45, C-terminal	2	6431	2	31113	0.000311	0	inf	0.042719	1
C_NC	PF15303	Pfam	E3 ubiquitin-protein ligase Arkadia, N-terminal	3	6431	4	31113	0.000466	4.1e-05	3.52531	0.029839	1
C_NC	PF15308	Pfam	CEP170, C-terminal	4	6431	5	31113	0.000622	4.1e-05	3.94034	0.007613	0.9999
C_NC	PF15423	Pfam	FLYWCH-type zinc finger-containing protein, N-terminal	3	6431	3	31113	0.000466	0	inf	0.008828	1
C_NC	PF15501	Pfam	Nuclear protein MDM1	3	6431	3	31113	0.000466	0	inf	0.008828	1
C_NC	PIRSF000484	PIRSF	Nicotinate phosphoribosyltransferase family	2	6431	2	31113	0.000311	0	inf	0.042719	1
C_NC	PIRSF001348	PIRSF	Phosphoenolpyruvate carboxykinase, GTP-utilising	2	6431	2	31113	0.000311	0	inf	0.042719	1
C_NC	PIRSF002304	PIRSF		7	6431	7	31113	0.001088	0	inf	1.6e-05	0.0431
C_NC	PIRSF005225	PIRSF	Ceramide synthase component Lag1/Lac1	2	6431	2	31113	0.000311	0	inf	0.042719	1
C_NC	PIRSF005902	PIRSF	TatD family	3	6431	3	31113	0.000466	0	inf	0.008828	1
C_NC	PIRSF006113	PIRSF	6-pyruvoyl tetrahydropterin synthase/QueD family protein	4	6431	5	31113	0.000622	4.1e-05	3.94034	0.007613	0.9999
C_NC	PIRSF009935	PIRSF	T-cell leukemia translocation-altered gene protein	2	6431	2	31113	0.000311	0	inf	0.042719	1
C_NC	PIRSF015901	PIRSF	Nascent polypeptide-associated complex subunit alpha	2	6431	2	31113	0.000311	0	inf	0.042719	1
C_NC	PIRSF016393	PIRSF	Enhancer of rudimentary	2	6431	2	31113	0.000311	0	inf	0.042719	1
C_NC	PIRSF038006	PIRSF	Methyl-CpG binding protein MeCP2	2	6431	2	31113	0.000311	0	inf	0.042719	1
C_NC	PIRSF038039	PIRSF		3	6431	4	31113	0.000466	4.1e-05	3.52531	0.029839	1
C_NC	PIRSF038150	PIRSF	Mitochondrial outer membrane transport complex protein, metaxin	4	6431	4	31113	0.000622	0	inf	0.001824	0.874
C_NC	PIRSF038169	PIRSF	WD repeat protein 55	2	6431	2	31113	0.000311	0	inf	0.042719	1
C_NC	PR00006	PRINTS	ADF/Cofilin/Destrin	6	6431	8	31113	0.000933	8.1e-05	3.52531	0.001478	0.8118
C_NC	PR00204	PRINTS	Amyloidogenic glycoprotein, amyloid-beta peptide	3	6431	3	31113	0.000466	0	inf	0.008828	1
C_NC	PR00262	PRINTS	IL-1 family/FGF family	4	6431	6	31113	0.000622	8.1e-05	2.94034	0.019094	1
C_NC	PR00263	PRINTS	Fibroblast growth factor family	5	6431	9	31113	0.000777	0.000162	2.26227	0.022471	1
C_NC	PR00276	PRINTS	Insulin family	5	6431	9	31113	0.000777	0.000162	2.26227	0.022471	1
C_NC	PR00298	PRINTS	Chaperonin Cpn60	4	6431	7	31113	0.000622	0.000122	2.35538	0.037314	1
C_NC	PR00391	PRINTS	Phosphatidylinositol transfer protein	5	6431	8	31113	0.000777	0.000122	2.67731	0.012018	1
C_NC	PR00500	PRINTS	Polycystic kidney disease type 1 protein	5	6431	9	31113	0.000777	0.000162	2.26227	0.022471	1
C_NC	PR00503	PRINTS	Bromodomain	4	6431	6	31113	0.000622	8.1e-05	2.94034	0.019094	1
C_NC	PR00507	PRINTS		2	6431	2	31113	0.000311	0	inf	0.042719	1
C_NC	PR00773	PRINTS	GrpE nucleotide exchange factor	2	6431	2	31113	0.000311	0	inf	0.042719	1
C_NC	PR00794	PRINTS	Pancreatic ribonuclease	2	6431	2	31113	0.000311	0	inf	0.042719	1
C_NC	PR00806	PRINTS		2	6431	2	31113	0.000311	0	inf	0.042719	1
C_NC	PR00862	PRINTS	Peptidase S9A, prolyl oligopeptidase	4	6431	4	31113	0.000622	0	inf	0.001824	0.874
C_NC	PR00869	PRINTS	DNA polymerase family X	4	6431	7	31113	0.000622	0.000122	2.35538	0.037314	1
C_NC	PR00929	PRINTS	AT hook-like	3	6431	3	31113	0.000466	0	inf	0.008828	1
C_NC	PR00930	PRINTS	High mobility group protein HMGA	3	6431	3	31113	0.000466	0	inf	0.008828	1
C_NC	PR00980	PRINTS	Alanine-tRNA ligase, class IIc	2	6431	2	31113	0.000311	0	inf	0.042719	1
C_NC	PR01094	PRINTS	ATP-binding cassette subfamily C member 9	3	6431	4	31113	0.000466	4.1e-05	3.52531	0.029839	1
C_NC	PR01130	PRINTS	Equilibrative nucleoside transporter	2	6431	2	31113	0.000311	0	inf	0.042719	1
C_NC	PR01405	PRINTS	Bis(5'-nucleosyl)-tetraphosphatase	2	6431	2	31113	0.000311	0	inf	0.042719	1
C_NC	PR01444	PRINTS	GPCR, family 2, latrophilin	6	6431	8	31113	0.000933	8.1e-05	3.52531	0.001478	0.8118
C_NC	PR01452	PRINTS	Notch domain	2	6431	2	31113	0.000311	0	inf	0.042719	1
C_NC	PR01474	PRINTS	Vascular cell adhesion molecule-1	2	6431	2	31113	0.000311	0	inf	0.042719	1
C_NC	PR01518	PRINTS	Potassium channel, voltage dependent, Kv4.3	2	6431	2	31113	0.000311	0	inf	0.042719	1
C_NC	PR01527	PRINTS	Lysophosphatidic acid receptor	2	6431	2	31113	0.000311	0	inf	0.042719	1
C_NC	PR01597	PRINTS	Tight junction protein ZO	3	6431	3	31113	0.000466	0	inf	0.008828	1
C_NC	PR01599	PRINTS	Tight junction protein ZO-2	5	6431	8	31113	0.000777	0.000122	2.67731	0.012018	1
C_NC	PR01666	PRINTS	Voltage gated sodium channel, alpha-5 subunit	4	6431	4	31113	0.000622	0	inf	0.001824	0.874
C_NC	PR01802	PRINTS	Synembryn	7	6431	9	31113	0.001088	8.1e-05	3.7477	0.000389	0.3601
C_NC	PR01821	PRINTS	DAPIT	2	6431	2	31113	0.000311	0	inf	0.042719	1
C_NC	PR01983	PRINTS		2	6431	2	31113	0.000311	0	inf	0.042719	1
C_NC	PR01985	PRINTS	Neurogenic locus Notch 2	2	6431	2	31113	0.000311	0	inf	0.042719	1
C_NC	PR02002	PRINTS	Insulin-like growth factor	5	6431	9	31113	0.000777	0.000162	2.26227	0.022471	1
C_NC	PR02005	PRINTS	Insulin-like growth factor I	5	6431	9	31113	0.000777	0.000162	2.26227	0.022471	1
C_NC	PR02090	PRINTS	HAUS augmin-like complex subunit 4, metazoa	2	6431	2	31113	0.000311	0	inf	0.042719	1
C_NC	PR02106	PRINTS	Integrator complex subunit 10	2	6431	2	31113	0.000311	0	inf	0.042719	1
C_NC	PS00069	Prosite_patterns	Glucose-6-phosphate dehydrogenase, active site	3	6431	4	31113	0.000466	4.1e-05	3.52531	0.029839	1
C_NC	PS00127	Prosite_patterns	Ribonuclease A, active site	2	6431	2	31113	0.000311	0	inf	0.042719	1
C_NC	PS00153	Prosite_patterns	ATPase, F1 complex, gamma subunit conserved site	3	6431	3	31113	0.000466	0	inf	0.008828	1
C_NC	PS00242	Prosite_patterns	Integrin alpha chain, C-terminal cytoplasmic region, conserved site	6	6431	9	31113	0.000933	0.000122	2.94034	0.003655	0.981
C_NC	PS00247	Prosite_patterns	Fibroblast growth factor family	4	6431	6	31113	0.000622	8.1e-05	2.94034	0.019094	1
C_NC	PS00262	Prosite_patterns	Insulin, conserved site	3	6431	3	31113	0.000466	0	inf	0.008828	1
C_NC	PS00354	Prosite_patterns	HMG-I/HMG-Y, DNA-binding, conserved site	3	6431	3	31113	0.000466	0	inf	0.008828	1
C_NC	PS00522	Prosite_patterns	DNA polymerase family X, binding site	2	6431	2	31113	0.000311	0	inf	0.042719	1
C_NC	PS00581	Prosite_patterns	Clathrin light chain	6	6431	8	31113	0.000933	8.1e-05	3.52531	0.001478	0.8118
C_NC	PS00856	Prosite_patterns	Guanylate kinase, conserved site	3	6431	3	31113	0.000466	0	inf	0.008828	1
C_NC	PS00893	Prosite_patterns	NUDIX hydrolase, conserved site	4	6431	5	31113	0.000622	4.1e-05	3.94034	0.007613	0.9999
C_NC	PS00987	Prosite_patterns	6-pyruvoyl tetrahydropterin synthase, cysteine active site	6	6431	8	31113	0.000933	8.1e-05	3.52531	0.001478	0.8118
C_NC	PS01091	Prosite_patterns	Deoxyribonuclease, TatD-related, conserved site	5	6431	7	31113	0.000777	8.1e-05	3.26227	0.00543	0.9979
C_NC	PS01096	Prosite_patterns	Peptidyl-prolyl cis-trans isomerase, PpiC-type, conserved site	3	6431	3	31113	0.000466	0	inf	0.008828	1
C_NC	PS01194	Prosite_patterns	Ribosomal protein L15e, conserved site	2	6431	2	31113	0.000311	0	inf	0.042719	1
C_NC	PS01358	Prosite_patterns	Zinc finger, RanBP2-type	3	6431	3	31113	0.000466	0	inf	0.008828	1
C_NC	PS50006	Prosite_profiles	Forkhead-associated (FHA) domain	3	6431	4	31113	0.000466	4.1e-05	3.52531	0.029839	1
C_NC	PS50009	Prosite_profiles	Ras guanine-nucleotide exchange factors catalytic domain	5	6431	8	31113	0.000777	0.000122	2.67731	0.012018	1
C_NC	PS50014	Prosite_profiles	Bromodomain	6	6431	8	31113	0.000933	8.1e-05	3.52531	0.001478	0.8118
C_NC	PS50176	Prosite_profiles	Armadillo	2	6431	2	31113	0.000311	0	inf	0.042719	1
C_NC	PS50177	Prosite_profiles	Nuclear transport factor 2, eukaryote	4	6431	6	31113	0.000622	8.1e-05	2.94034	0.019094	1
C_NC	PS50198	Prosite_profiles	Peptidyl-prolyl cis-trans isomerase, PpiC-type	4	6431	4	31113	0.000622	0	inf	0.001824	0.874
C_NC	PS50199	Prosite_profiles	Zinc finger, RanBP2-type	3	6431	3	31113	0.000466	0	inf	0.008828	1
C_NC	PS50258	Prosite_profiles	Notch domain	2	6431	2	31113	0.000311	0	inf	0.042719	1
C_NC	PS50330	Prosite_profiles	Ubiquitin interacting motif	5	6431	8	31113	0.000777	0.000122	2.67731	0.012018	1
C_NC	PS50812	Prosite_profiles	PWWP domain	4	6431	6	31113	0.000622	8.1e-05	2.94034	0.019094	1
C_NC	PS50841	Prosite_profiles	DIX domain	3	6431	3	31113	0.000466	0	inf	0.008828	1
C_NC	PS50913	Prosite_profiles	GRIP	4	6431	5	31113	0.000622	4.1e-05	3.94034	0.007613	0.9999
C_NC	PS50934	Prosite_profiles	SWIRM domain	4	6431	6	31113	0.000622	8.1e-05	2.94034	0.019094	1
C_NC	PS50945	Prosite_profiles	I/LWEQ domain	2	6431	2	31113	0.000311	0	inf	0.042719	1
C_NC	PS50982	Prosite_profiles	Methyl-CpG DNA binding	6	6431	6	31113	0.000933	0	inf	7.8e-05	0.1192
C_NC	PS51038	Prosite_profiles	Bromo adjacent homology (BAH) domain	4	6431	4	31113	0.000622	0	inf	0.001824	0.874
C_NC	PS51044	Prosite_profiles	Zinc finger, MIZ-type	3	6431	4	31113	0.000466	4.1e-05	3.52531	0.029839	1
C_NC	PS51050	Prosite_profiles	Zinc finger, CW-type	4	6431	4	31113	0.000622	0	inf	0.001824	0.874
C_NC	PS51060	Prosite_profiles	Poly(ADP-ribose) polymerase, regulatory domain	2	6431	2	31113	0.000311	0	inf	0.042719	1
C_NC	PS51115	Prosite_profiles	Laminin IV	3	6431	4	31113	0.000466	4.1e-05	3.52531	0.029839	1
C_NC	PS51189	Prosite_profiles	PIK-related kinase	4	6431	4	31113	0.000622	0	inf	0.001824	0.874
C_NC	PS51232	Prosite_profiles	Rho GTPase-binding/formin homology 3 (GBD/FH3) domain	3	6431	3	31113	0.000466	0	inf	0.008828	1
C_NC	PS51296	Prosite_profiles	Rieske [2Fe-2S] iron-sulphur domain	3	6431	3	31113	0.000466	0	inf	0.008828	1
C_NC	PS51391	Prosite_profiles	CID domain	4	6431	6	31113	0.000622	8.1e-05	2.94034	0.019094	1
C_NC	PS51403	Prosite_profiles	Collagen IV, non-collagenous	2	6431	2	31113	0.000311	0	inf	0.042719	1
C_NC	PS51461	Prosite_profiles	Fibrillar collagen, C-terminal	2	6431	2	31113	0.000311	0	inf	0.042719	1
C_NC	PS51469	Prosite_profiles	SUN domain	2	6431	2	31113	0.000311	0	inf	0.042719	1
C_NC	PS51716	Prosite_profiles	IRG-type guanine nucleotide-binding (G) domain	5	6431	9	31113	0.000777	0.000162	2.26227	0.022471	1
C_NC	PTHR10060:SF15	PANTHER		2	6431	2	31113	0.000311	0	inf	0.042719	1
C_NC	PTHR10072	PANTHER		2	6431	2	31113	0.000311	0	inf	0.042719	1
C_NC	PTHR10108:SF693	PANTHER		2	6431	2	31113	0.000311	0	inf	0.042719	1
C_NC	PTHR10159:SF30	PANTHER		4	6431	5	31113	0.000622	4.1e-05	3.94034	0.007613	0.9999
C_NC	PTHR10165:SF26	PANTHER		5	6431	8	31113	0.000777	0.000122	2.67731	0.012018	1
C_NC	PTHR10300:SF4	PANTHER		2	6431	2	31113	0.000311	0	inf	0.042719	1
C_NC	PTHR10300:SF5	PANTHER		4	6431	6	31113	0.000622	8.1e-05	2.94034	0.019094	1
C_NC	PTHR10316:SF27	PANTHER		2	6431	2	31113	0.000311	0	inf	0.042719	1
C_NC	PTHR10333:SF38	PANTHER		2	6431	2	31113	0.000311	0	inf	0.042719	1
C_NC	PTHR10338:SF100	PANTHER		2	6431	2	31113	0.000311	0	inf	0.042719	1
C_NC	PTHR10342:SF210	PANTHER		4	6431	5	31113	0.000622	4.1e-05	3.94034	0.007613	0.9999
C_NC	PTHR10366	PANTHER		4	6431	5	31113	0.000622	4.1e-05	3.94034	0.007613	0.9999
C_NC	PTHR10366:SF259	PANTHER		4	6431	4	31113	0.000622	0	inf	0.001824	0.874
C_NC	PTHR10460	PANTHER		4	6431	6	31113	0.000622	8.1e-05	2.94034	0.019094	1
C_NC	PTHR10489:SF550	PANTHER		2	6431	2	31113	0.000311	0	inf	0.042719	1
C_NC	PTHR10498:SF9	PANTHER		4	6431	6	31113	0.000622	8.1e-05	2.94034	0.019094	1
C_NC	PTHR10548:SF9	PANTHER		2	6431	2	31113	0.000311	0	inf	0.042719	1
C_NC	PTHR10613	PANTHER		3	6431	3	31113	0.000466	0	inf	0.008828	1
C_NC	PTHR10613:SF0	PANTHER		3	6431	3	31113	0.000466	0	inf	0.008828	1
C_NC	PTHR10657	PANTHER		4	6431	4	31113	0.000622	0	inf	0.001824	0.874
C_NC	PTHR10658	PANTHER		6	6431	9	31113	0.000933	0.000122	2.94034	0.003655	0.981
C_NC	PTHR10661:SF15	PANTHER		4	6431	7	31113	0.000622	0.000122	2.35538	0.037314	1
C_NC	PTHR10663:SF124	PANTHER		3	6431	3	31113	0.000466	0	inf	0.008828	1
C_NC	PTHR10671:SF35	PANTHER		2	6431	2	31113	0.000311	0	inf	0.042719	1
C_NC	PTHR10672:SF5	PANTHER		2	6431	2	31113	0.000311	0	inf	0.042719	1
C_NC	PTHR10694:SF30	PANTHER		2	6431	2	31113	0.000311	0	inf	0.042719	1
C_NC	PTHR10742:SF241	PANTHER		2	6431	2	31113	0.000311	0	inf	0.042719	1
C_NC	PTHR10797	PANTHER		2	6431	2	31113	0.000311	0	inf	0.042719	1
C_NC	PTHR10797:SF1	PANTHER		2	6431	2	31113	0.000311	0	inf	0.042719	1
C_NC	PTHR10799:SF599	PANTHER		4	6431	4	31113	0.000622	0	inf	0.001824	0.874
C_NC	PTHR10807	PANTHER		6	6431	7	31113	0.000933	4.1e-05	4.52531	0.000448	0.391
C_NC	PTHR10807:SF40	PANTHER		5	6431	6	31113	0.000777	4.1e-05	4.26227	0.001872	0.894
C_NC	PTHR10891	PANTHER		5	6431	7	31113	0.000777	8.1e-05	3.26227	0.00543	0.9979
C_NC	PTHR10900	PANTHER		2	6431	2	31113	0.000311	0	inf	0.042719	1
C_NC	PTHR10900:SF12	PANTHER		2	6431	2	31113	0.000311	0	inf	0.042719	1
C_NC	PTHR10959:SF2	PANTHER		3	6431	3	31113	0.000466	0	inf	0.008828	1
C_NC	PTHR11039:SF30	PANTHER		4	6431	4	31113	0.000622	0	inf	0.001824	0.874
C_NC	PTHR11079	PANTHER		2	6431	2	31113	0.000311	0	inf	0.042719	1
C_NC	PTHR11079:SF47	PANTHER		2	6431	2	31113	0.000311	0	inf	0.042719	1
C_NC	PTHR11085	PANTHER		5	6431	8	31113	0.000777	0.000122	2.67731	0.012018	1
C_NC	PTHR11085:SF14	PANTHER		5	6431	8	31113	0.000777	0.000122	2.67731	0.012018	1
C_NC	PTHR11092	PANTHER		3	6431	4	31113	0.000466	4.1e-05	3.52531	0.029839	1
C_NC	PTHR11098	PANTHER		2	6431	2	31113	0.000311	0	inf	0.042719	1
C_NC	PTHR11098:SF1	PANTHER		2	6431	2	31113	0.000311	0	inf	0.042719	1
C_NC	PTHR11243:SF15	PANTHER		7	6431	7	31113	0.001088	0	inf	1.6e-05	0.0431
C_NC	PTHR11254:SF278	PANTHER		2	6431	2	31113	0.000311	0	inf	0.042719	1
C_NC	PTHR11260:SF142	PANTHER		2	6431	2	31113	0.000311	0	inf	0.042719	1
C_NC	PTHR11304:SF18	PANTHER		4	6431	4	31113	0.000622	0	inf	0.001824	0.874
C_NC	PTHR11324	PANTHER		3	6431	3	31113	0.000466	0	inf	0.008828	1
C_NC	PTHR11324:SF16	PANTHER		3	6431	3	31113	0.000466	0	inf	0.008828	1
C_NC	PTHR11383	PANTHER		6	6431	7	31113	0.000933	4.1e-05	4.52531	0.000448	0.391
C_NC	PTHR11383:SF3	PANTHER		6	6431	7	31113	0.000933	4.1e-05	4.52531	0.000448	0.391
C_NC	PTHR11389:SF353	PANTHER		2	6431	2	31113	0.000311	0	inf	0.042719	1
C_NC	PTHR11437	PANTHER		2	6431	2	31113	0.000311	0	inf	0.042719	1
C_NC	PTHR11437:SF10	PANTHER		2	6431	2	31113	0.000311	0	inf	0.042719	1
C_NC	PTHR11452:SF25	PANTHER		2	6431	2	31113	0.000311	0	inf	0.042719	1
C_NC	PTHR11454	PANTHER		5	6431	9	31113	0.000777	0.000162	2.26227	0.022471	1
C_NC	PTHR11454:SF4	PANTHER		5	6431	9	31113	0.000777	0.000162	2.26227	0.022471	1
C_NC	PTHR11486	PANTHER		5	6431	8	31113	0.000777	0.000122	2.67731	0.012018	1
C_NC	PTHR11486:SF67	PANTHER		2	6431	2	31113	0.000311	0	inf	0.042719	1
C_NC	PTHR11492:SF3	PANTHER		4	6431	6	31113	0.000622	8.1e-05	2.94034	0.019094	1
C_NC	PTHR11506:SF6	PANTHER		3	6431	3	31113	0.000466	0	inf	0.008828	1
C_NC	PTHR11537:SF39	PANTHER		2	6431	2	31113	0.000311	0	inf	0.042719	1
C_NC	PTHR11561	PANTHER		2	6431	2	31113	0.000311	0	inf	0.042719	1
C_NC	PTHR11561:SF3	PANTHER		2	6431	2	31113	0.000311	0	inf	0.042719	1
C_NC	PTHR11603	PANTHER		4	6431	6	31113	0.000622	8.1e-05	2.94034	0.019094	1
C_NC	PTHR11685	PANTHER		4	6431	7	31113	0.000622	0.000122	2.35538	0.037314	1
C_NC	PTHR11685:SF7	PANTHER		4	6431	5	31113	0.000622	4.1e-05	3.94034	0.007613	0.9999
C_NC	PTHR11711:SF124	PANTHER		4	6431	7	31113	0.000622	0.000122	2.35538	0.037314	1
C_NC	PTHR11753:SF12	PANTHER		5	6431	9	31113	0.000777	0.000162	2.26227	0.022471	1
C_NC	PTHR11753:SF8	PANTHER		4	6431	5	31113	0.000622	4.1e-05	3.94034	0.007613	0.9999
C_NC	PTHR11817:SF10	PANTHER		2	6431	2	31113	0.000311	0	inf	0.042719	1
C_NC	PTHR11829:SF106	PANTHER		2	6431	2	31113	0.000311	0	inf	0.042719	1
C_NC	PTHR11839	PANTHER		2	6431	2	31113	0.000311	0	inf	0.042719	1
C_NC	PTHR11839:SF4	PANTHER		2	6431	2	31113	0.000311	0	inf	0.042719	1
C_NC	PTHR11847	PANTHER		2	6431	2	31113	0.000311	0	inf	0.042719	1
C_NC	PTHR11878	PANTHER		4	6431	7	31113	0.000622	0.000122	2.35538	0.037314	1
C_NC	PTHR11913	PANTHER		5	6431	7	31113	0.000777	8.1e-05	3.26227	0.00543	0.9979
C_NC	PTHR11913:SF15	PANTHER		2	6431	2	31113	0.000311	0	inf	0.042719	1
C_NC	PTHR11913:SF18	PANTHER		3	6431	3	31113	0.000466	0	inf	0.008828	1
C_NC	PTHR11932:SF67	PANTHER		4	6431	7	31113	0.000622	0.000122	2.35538	0.037314	1
C_NC	PTHR11945:SF23	PANTHER		5	6431	9	31113	0.000777	0.000162	2.26227	0.022471	1
C_NC	PTHR11960:SF17	PANTHER		5	6431	8	31113	0.000777	0.000122	2.67731	0.012018	1
C_NC	PTHR12069	PANTHER		2	6431	2	31113	0.000311	0	inf	0.042719	1
C_NC	PTHR12121	PANTHER		2	6431	2	31113	0.000311	0	inf	0.042719	1
C_NC	PTHR12121:SF32	PANTHER		2	6431	2	31113	0.000311	0	inf	0.042719	1
C_NC	PTHR12156	PANTHER		7	6431	9	31113	0.001088	8.1e-05	3.7477	0.000389	0.3601
C_NC	PTHR12156:SF16	PANTHER		7	6431	8	31113	0.001088	4.1e-05	4.7477	0.000105	0.1366
C_NC	PTHR12174	PANTHER		4	6431	4	31113	0.000622	0	inf	0.001824	0.874
C_NC	PTHR12174:SF34	PANTHER		4	6431	4	31113	0.000622	0	inf	0.001824	0.874
C_NC	PTHR12187	PANTHER		2	6431	2	31113	0.000311	0	inf	0.042719	1
C_NC	PTHR12187:SF4	PANTHER		2	6431	2	31113	0.000311	0	inf	0.042719	1
C_NC	PTHR12231:SF60	PANTHER		2	6431	2	31113	0.000311	0	inf	0.042719	1
C_NC	PTHR12264	PANTHER		3	6431	3	31113	0.000466	0	inf	0.008828	1
C_NC	PTHR12289	PANTHER		4	6431	4	31113	0.000622	0	inf	0.001824	0.874
C_NC	PTHR12289:SF30	PANTHER		4	6431	4	31113	0.000622	0	inf	0.001824	0.874
C_NC	PTHR12305	PANTHER		6	6431	9	31113	0.000933	0.000122	2.94034	0.003655	0.981
C_NC	PTHR12305:SF40	PANTHER		5	6431	8	31113	0.000777	0.000122	2.67731	0.012018	1
C_NC	PTHR12308	PANTHER		2	6431	2	31113	0.000311	0	inf	0.042719	1
C_NC	PTHR12308:SF26	PANTHER		2	6431	2	31113	0.000311	0	inf	0.042719	1
C_NC	PTHR12349	PANTHER		4	6431	4	31113	0.000622	0	inf	0.001824	0.874
C_NC	PTHR12349:SF1	PANTHER		4	6431	4	31113	0.000622	0	inf	0.001824	0.874
C_NC	PTHR12372	PANTHER		5	6431	7	31113	0.000777	8.1e-05	3.26227	0.00543	0.9979
C_NC	PTHR12372:SF2	PANTHER		3	6431	3	31113	0.000466	0	inf	0.008828	1
C_NC	PTHR12373	PANTHER		2	6431	2	31113	0.000311	0	inf	0.042719	1
C_NC	PTHR12373:SF1	PANTHER		2	6431	2	31113	0.000311	0	inf	0.042719	1
C_NC	PTHR12394:SF11	PANTHER		3	6431	3	31113	0.000466	0	inf	0.008828	1
C_NC	PTHR12396	PANTHER		6	6431	6	31113	0.000933	0	inf	7.8e-05	0.1192
C_NC	PTHR12396:SF4	PANTHER		5	6431	5	31113	0.000777	0	inf	0.000377	0.3533
C_NC	PTHR12420	PANTHER		8	6431	8	31113	0.001244	0	inf	3e-06	0.0171
C_NC	PTHR12420:SF11	PANTHER		8	6431	8	31113	0.001244	0	inf	3e-06	0.0171
C_NC	PTHR12425	PANTHER		4	6431	5	31113	0.000622	4.1e-05	3.94034	0.007613	0.9999
C_NC	PTHR12425:SF2	PANTHER		4	6431	5	31113	0.000622	4.1e-05	3.94034	0.007613	0.9999
C_NC	PTHR12468	PANTHER		3	6431	3	31113	0.000466	0	inf	0.008828	1
C_NC	PTHR12468:SF2	PANTHER		3	6431	3	31113	0.000466	0	inf	0.008828	1
C_NC	PTHR12469	PANTHER		2	6431	2	31113	0.000311	0	inf	0.042719	1
C_NC	PTHR12469:SF2	PANTHER		2	6431	2	31113	0.000311	0	inf	0.042719	1
C_NC	PTHR12533	PANTHER		3	6431	3	31113	0.000466	0	inf	0.008828	1
C_NC	PTHR12533:SF6	PANTHER		2	6431	2	31113	0.000311	0	inf	0.042719	1
C_NC	PTHR12549:SF8	PANTHER		2	6431	2	31113	0.000311	0	inf	0.042719	1
C_NC	PTHR12560	PANTHER		2	6431	2	31113	0.000311	0	inf	0.042719	1
C_NC	PTHR12560:SF10	PANTHER		2	6431	2	31113	0.000311	0	inf	0.042719	1
C_NC	PTHR12566:SF4	PANTHER		2	6431	2	31113	0.000311	0	inf	0.042719	1
C_NC	PTHR12589	PANTHER		4	6431	5	31113	0.000622	4.1e-05	3.94034	0.007613	0.9999
C_NC	PTHR12589:SF1	PANTHER		4	6431	5	31113	0.000622	4.1e-05	3.94034	0.007613	0.9999
C_NC	PTHR12603	PANTHER		2	6431	2	31113	0.000311	0	inf	0.042719	1
C_NC	PTHR12603:SF2	PANTHER		2	6431	2	31113	0.000311	0	inf	0.042719	1
C_NC	PTHR12612	PANTHER		4	6431	6	31113	0.000622	8.1e-05	2.94034	0.019094	1
C_NC	PTHR12620	PANTHER		3	6431	3	31113	0.000466	0	inf	0.008828	1
C_NC	PTHR12620:SF5	PANTHER		3	6431	3	31113	0.000466	0	inf	0.008828	1
C_NC	PTHR12675	PANTHER		3	6431	3	31113	0.000466	0	inf	0.008828	1
C_NC	PTHR12675:SF4	PANTHER		3	6431	3	31113	0.000466	0	inf	0.008828	1
C_NC	PTHR12684	PANTHER		4	6431	4	31113	0.000622	0	inf	0.001824	0.874
C_NC	PTHR12684:SF2	PANTHER		4	6431	4	31113	0.000622	0	inf	0.001824	0.874
C_NC	PTHR12701:SF15	PANTHER		4	6431	4	31113	0.000622	0	inf	0.001824	0.874
C_NC	PTHR12750	PANTHER		2	6431	2	31113	0.000311	0	inf	0.042719	1
C_NC	PTHR12750:SF11	PANTHER		2	6431	2	31113	0.000311	0	inf	0.042719	1
C_NC	PTHR12751:SF4	PANTHER		6	6431	6	31113	0.000933	0	inf	7.8e-05	0.1192
C_NC	PTHR12751:SF6	PANTHER		4	6431	4	31113	0.000622	0	inf	0.001824	0.874
C_NC	PTHR12800:SF2	PANTHER		2	6431	2	31113	0.000311	0	inf	0.042719	1
C_NC	PTHR12846:SF14	PANTHER		3	6431	4	31113	0.000466	4.1e-05	3.52531	0.029839	1
C_NC	PTHR12854:SF11	PANTHER		2	6431	2	31113	0.000311	0	inf	0.042719	1
C_NC	PTHR12953	PANTHER		2	6431	2	31113	0.000311	0	inf	0.042719	1
C_NC	PTHR12953:SF0	PANTHER		2	6431	2	31113	0.000311	0	inf	0.042719	1
C_NC	PTHR12957	PANTHER		2	6431	2	31113	0.000311	0	inf	0.042719	1
C_NC	PTHR12957:SF23	PANTHER		2	6431	2	31113	0.000311	0	inf	0.042719	1
C_NC	PTHR13018	PANTHER		5	6431	6	31113	0.000777	4.1e-05	4.26227	0.001872	0.894
C_NC	PTHR13018:SF38	PANTHER		5	6431	6	31113	0.000777	4.1e-05	4.26227	0.001872	0.894
C_NC	PTHR13093	PANTHER		3	6431	3	31113	0.000466	0	inf	0.008828	1
C_NC	PTHR13119	PANTHER		5	6431	7	31113	0.000777	8.1e-05	3.26227	0.00543	0.9979
C_NC	PTHR13119:SF21	PANTHER		4	6431	4	31113	0.000622	0	inf	0.001824	0.874
C_NC	PTHR13123	PANTHER		2	6431	2	31113	0.000311	0	inf	0.042719	1
C_NC	PTHR13123:SF8	PANTHER		2	6431	2	31113	0.000311	0	inf	0.042719	1
C_NC	PTHR13140:SF293	PANTHER		2	6431	2	31113	0.000311	0	inf	0.042719	1
C_NC	PTHR13170	PANTHER		2	6431	2	31113	0.000311	0	inf	0.042719	1
C_NC	PTHR13170:SF16	PANTHER		2	6431	2	31113	0.000311	0	inf	0.042719	1
C_NC	PTHR13219	PANTHER		2	6431	2	31113	0.000311	0	inf	0.042719	1
C_NC	PTHR13219:SF6	PANTHER		2	6431	2	31113	0.000311	0	inf	0.042719	1
C_NC	PTHR13292	PANTHER		2	6431	2	31113	0.000311	0	inf	0.042719	1
C_NC	PTHR13292:SF0	PANTHER		2	6431	2	31113	0.000311	0	inf	0.042719	1
C_NC	PTHR13394	PANTHER		3	6431	4	31113	0.000466	4.1e-05	3.52531	0.029839	1
C_NC	PTHR13394:SF0	PANTHER		3	6431	4	31113	0.000466	4.1e-05	3.52531	0.029839	1
C_NC	PTHR13411	PANTHER		4	6431	5	31113	0.000622	4.1e-05	3.94034	0.007613	0.9999
C_NC	PTHR13456	PANTHER		4	6431	6	31113	0.000622	8.1e-05	2.94034	0.019094	1
C_NC	PTHR13456:SF0	PANTHER		4	6431	6	31113	0.000622	8.1e-05	2.94034	0.019094	1
C_NC	PTHR13546	PANTHER		3	6431	3	31113	0.000466	0	inf	0.008828	1
C_NC	PTHR13546:SF14	PANTHER		3	6431	3	31113	0.000466	0	inf	0.008828	1
C_NC	PTHR13644	PANTHER		4	6431	5	31113	0.000622	4.1e-05	3.94034	0.007613	0.9999
C_NC	PTHR13715	PANTHER		3	6431	3	31113	0.000466	0	inf	0.008828	1
C_NC	PTHR13715:SF52	PANTHER		3	6431	3	31113	0.000466	0	inf	0.008828	1
C_NC	PTHR13859:SF13	PANTHER		2	6431	2	31113	0.000311	0	inf	0.042719	1
C_NC	PTHR13869:SF19	PANTHER		2	6431	2	31113	0.000311	0	inf	0.042719	1
C_NC	PTHR13923	PANTHER		2	6431	2	31113	0.000311	0	inf	0.042719	1
C_NC	PTHR13923:SF23	PANTHER		2	6431	2	31113	0.000311	0	inf	0.042719	1
C_NC	PTHR13982:SF1	PANTHER		2	6431	2	31113	0.000311	0	inf	0.042719	1
C_NC	PTHR14063	PANTHER		3	6431	4	31113	0.000466	4.1e-05	3.52531	0.029839	1
C_NC	PTHR14063:SF4	PANTHER		3	6431	4	31113	0.000466	4.1e-05	3.52531	0.029839	1
C_NC	PTHR14095	PANTHER		2	6431	2	31113	0.000311	0	inf	0.042719	1
C_NC	PTHR14102:SF9	PANTHER		3	6431	4	31113	0.000466	4.1e-05	3.52531	0.029839	1
C_NC	PTHR14130	PANTHER		3	6431	3	31113	0.000466	0	inf	0.008828	1
C_NC	PTHR14130:SF13	PANTHER		3	6431	3	31113	0.000466	0	inf	0.008828	1
C_NC	PTHR14247	PANTHER		2	6431	2	31113	0.000311	0	inf	0.042719	1
C_NC	PTHR14247:SF10	PANTHER		2	6431	2	31113	0.000311	0	inf	0.042719	1
C_NC	PTHR14273	PANTHER		2	6431	2	31113	0.000311	0	inf	0.042719	1
C_NC	PTHR14273:SF0	PANTHER		2	6431	2	31113	0.000311	0	inf	0.042719	1
C_NC	PTHR14286	PANTHER		7	6431	7	31113	0.001088	0	inf	1.6e-05	0.0431
C_NC	PTHR14292	PANTHER		2	6431	2	31113	0.000311	0	inf	0.042719	1
C_NC	PTHR14338	PANTHER		4	6431	4	31113	0.000622	0	inf	0.001824	0.874
C_NC	PTHR14338:SF4	PANTHER		4	6431	4	31113	0.000622	0	inf	0.001824	0.874
C_NC	PTHR14360:SF13	PANTHER		2	6431	2	31113	0.000311	0	inf	0.042719	1
C_NC	PTHR14493	PANTHER		3	6431	4	31113	0.000466	4.1e-05	3.52531	0.029839	1
C_NC	PTHR14493:SF37	PANTHER		3	6431	4	31113	0.000466	4.1e-05	3.52531	0.029839	1
C_NC	PTHR14614	PANTHER		2	6431	2	31113	0.000311	0	inf	0.042719	1
C_NC	PTHR14614:SF16	PANTHER		2	6431	2	31113	0.000311	0	inf	0.042719	1
C_NC	PTHR14768:SF4	PANTHER		2	6431	2	31113	0.000311	0	inf	0.042719	1
C_NC	PTHR14879	PANTHER		5	6431	8	31113	0.000777	0.000122	2.67731	0.012018	1
C_NC	PTHR14879:SF2	PANTHER		5	6431	8	31113	0.000777	0.000122	2.67731	0.012018	1
C_NC	PTHR14898	PANTHER		2	6431	2	31113	0.000311	0	inf	0.042719	1
C_NC	PTHR14957	PANTHER		3	6431	3	31113	0.000466	0	inf	0.008828	1
C_NC	PTHR15012	PANTHER		2	6431	2	31113	0.000311	0	inf	0.042719	1
C_NC	PTHR15012:SF31	PANTHER		2	6431	2	31113	0.000311	0	inf	0.042719	1
C_NC	PTHR15074	PANTHER		2	6431	2	31113	0.000311	0	inf	0.042719	1
C_NC	PTHR15074:SF1	PANTHER		2	6431	2	31113	0.000311	0	inf	0.042719	1
C_NC	PTHR15117	PANTHER		4	6431	6	31113	0.000622	8.1e-05	2.94034	0.019094	1
C_NC	PTHR15117:SF2	PANTHER		4	6431	4	31113	0.000622	0	inf	0.001824	0.874
C_NC	PTHR15136	PANTHER		7	6431	7	31113	0.001088	0	inf	1.6e-05	0.0431
C_NC	PTHR15136:SF2	PANTHER		2	6431	2	31113	0.000311	0	inf	0.042719	1
C_NC	PTHR15136:SF9	PANTHER		5	6431	5	31113	0.000777	0	inf	0.000377	0.3533
C_NC	PTHR15431	PANTHER		2	6431	2	31113	0.000311	0	inf	0.042719	1
C_NC	PTHR15431:SF3	PANTHER		2	6431	2	31113	0.000311	0	inf	0.042719	1
C_NC	PTHR15439	PANTHER		3	6431	3	31113	0.000466	0	inf	0.008828	1
C_NC	PTHR15439:SF1	PANTHER		3	6431	3	31113	0.000466	0	inf	0.008828	1
C_NC	PTHR15597:SF24	PANTHER		5	6431	8	31113	0.000777	0.000122	2.67731	0.012018	1
C_NC	PTHR15710	PANTHER		5	6431	7	31113	0.000777	8.1e-05	3.26227	0.00543	0.9979
C_NC	PTHR15710:SF5	PANTHER		3	6431	3	31113	0.000466	0	inf	0.008828	1
C_NC	PTHR15715	PANTHER		4	6431	6	31113	0.000622	8.1e-05	2.94034	0.019094	1
C_NC	PTHR15715:SF18	PANTHER		4	6431	6	31113	0.000622	8.1e-05	2.94034	0.019094	1
C_NC	PTHR15726	PANTHER		2	6431	2	31113	0.000311	0	inf	0.042719	1
C_NC	PTHR15726:SF5	PANTHER		2	6431	2	31113	0.000311	0	inf	0.042719	1
C_NC	PTHR15751:SF11	PANTHER		3	6431	4	31113	0.000466	4.1e-05	3.52531	0.029839	1
C_NC	PTHR15923	PANTHER		5	6431	7	31113	0.000777	8.1e-05	3.26227	0.00543	0.9979
C_NC	PTHR15923:SF0	PANTHER		4	6431	5	31113	0.000622	4.1e-05	3.94034	0.007613	0.9999
C_NC	PTHR16070	PANTHER		2	6431	2	31113	0.000311	0	inf	0.042719	1
C_NC	PTHR16070:SF1	PANTHER		2	6431	2	31113	0.000311	0	inf	0.042719	1
C_NC	PTHR16091	PANTHER		2	6431	2	31113	0.000311	0	inf	0.042719	1
C_NC	PTHR16122	PANTHER		2	6431	2	31113	0.000311	0	inf	0.042719	1
C_NC	PTHR16122:SF19	PANTHER		2	6431	2	31113	0.000311	0	inf	0.042719	1
C_NC	PTHR16155	PANTHER		2	6431	2	31113	0.000311	0	inf	0.042719	1
C_NC	PTHR16155:SF18	PANTHER		2	6431	2	31113	0.000311	0	inf	0.042719	1
C_NC	PTHR16160	PANTHER		6	6431	6	31113	0.000933	0	inf	7.8e-05	0.1192
C_NC	PTHR16160:SF11	PANTHER		6	6431	6	31113	0.000933	0	inf	7.8e-05	0.1192
C_NC	PTHR16228:SF25	PANTHER		3	6431	4	31113	0.000466	4.1e-05	3.52531	0.029839	1
C_NC	PTHR16299	PANTHER		2	6431	2	31113	0.000311	0	inf	0.042719	1
C_NC	PTHR16299:SF2	PANTHER		2	6431	2	31113	0.000311	0	inf	0.042719	1
C_NC	PTHR16318	PANTHER		2	6431	2	31113	0.000311	0	inf	0.042719	1
C_NC	PTHR16451	PANTHER		2	6431	2	31113	0.000311	0	inf	0.042719	1
C_NC	PTHR16451:SF2	PANTHER		2	6431	2	31113	0.000311	0	inf	0.042719	1
C_NC	PTHR16453	PANTHER		2	6431	2	31113	0.000311	0	inf	0.042719	1
C_NC	PTHR16500	PANTHER		4	6431	4	31113	0.000622	0	inf	0.001824	0.874
C_NC	PTHR16500:SF2	PANTHER		4	6431	4	31113	0.000622	0	inf	0.001824	0.874
C_NC	PTHR16675:SF139	PANTHER		4	6431	7	31113	0.000622	0.000122	2.35538	0.037314	1
C_NC	PTHR16770	PANTHER		2	6431	2	31113	0.000311	0	inf	0.042719	1
C_NC	PTHR16770:SF2	PANTHER		2	6431	2	31113	0.000311	0	inf	0.042719	1
C_NC	PTHR17604	PANTHER		2	6431	2	31113	0.000311	0	inf	0.042719	1
C_NC	PTHR17604:SF1	PANTHER		2	6431	2	31113	0.000311	0	inf	0.042719	1
C_NC	PTHR18866	PANTHER		2	6431	2	31113	0.000311	0	inf	0.042719	1
C_NC	PTHR18889:SF8	PANTHER		2	6431	2	31113	0.000311	0	inf	0.042719	1
C_NC	PTHR18895:SF64	PANTHER		2	6431	2	31113	0.000311	0	inf	0.042719	1
C_NC	PTHR18902	PANTHER		5	6431	8	31113	0.000777	0.000122	2.67731	0.012018	1
C_NC	PTHR18902:SF24	PANTHER		3	6431	3	31113	0.000466	0	inf	0.008828	1
C_NC	PTHR18916	PANTHER		5	6431	6	31113	0.000777	4.1e-05	4.26227	0.001872	0.894
C_NC	PTHR18916:SF10	PANTHER		2	6431	2	31113	0.000311	0	inf	0.042719	1
C_NC	PTHR18916:SF29	PANTHER		3	6431	4	31113	0.000466	4.1e-05	3.52531	0.029839	1
C_NC	PTHR18939	PANTHER		2	6431	2	31113	0.000311	0	inf	0.042719	1
C_NC	PTHR18939:SF4	PANTHER		2	6431	2	31113	0.000311	0	inf	0.042719	1
C_NC	PTHR19134:SF42	PANTHER		2	6431	2	31113	0.000311	0	inf	0.042719	1
C_NC	PTHR19212:SF1	PANTHER		2	6431	2	31113	0.000311	0	inf	0.042719	1
C_NC	PTHR19212:SF2	PANTHER		4	6431	7	31113	0.000622	0.000122	2.35538	0.037314	1
C_NC	PTHR19297:SF78	PANTHER		2	6431	2	31113	0.000311	0	inf	0.042719	1
C_NC	PTHR19307	PANTHER		8	6431	8	31113	0.001244	0	inf	3e-06	0.0171
C_NC	PTHR19307:SF12	PANTHER		3	6431	3	31113	0.000466	0	inf	0.008828	1
C_NC	PTHR19307:SF8	PANTHER		5	6431	5	31113	0.000777	0	inf	0.000377	0.3533
C_NC	PTHR19316	PANTHER		2	6431	2	31113	0.000311	0	inf	0.042719	1
C_NC	PTHR19316:SF18	PANTHER		2	6431	2	31113	0.000311	0	inf	0.042719	1
C_NC	PTHR19325:SF6	PANTHER		2	6431	2	31113	0.000311	0	inf	0.042719	1
C_NC	PTHR19831:SF14	PANTHER		2	6431	2	31113	0.000311	0	inf	0.042719	1
C_NC	PTHR19897:SF152	PANTHER		3	6431	3	31113	0.000466	0	inf	0.008828	1
C_NC	PTHR19957:SF34	PANTHER		4	6431	6	31113	0.000622	8.1e-05	2.94034	0.019094	1
C_NC	PTHR20426	PANTHER		3	6431	4	31113	0.000466	4.1e-05	3.52531	0.029839	1
C_NC	PTHR20426:SF0	PANTHER		3	6431	4	31113	0.000466	4.1e-05	3.52531	0.029839	1
C_NC	PTHR20854	PANTHER		3	6431	3	31113	0.000466	0	inf	0.008828	1
C_NC	PTHR20854:SF5	PANTHER		3	6431	3	31113	0.000466	0	inf	0.008828	1
C_NC	PTHR20932:SF7	PANTHER		6	6431	6	31113	0.000933	0	inf	7.8e-05	0.1192
C_NC	PTHR21193	PANTHER		2	6431	2	31113	0.000311	0	inf	0.042719	1
C_NC	PTHR21193:SF2	PANTHER		2	6431	2	31113	0.000311	0	inf	0.042719	1
C_NC	PTHR21228	PANTHER		3	6431	4	31113	0.000466	4.1e-05	3.52531	0.029839	1
C_NC	PTHR21228:SF9	PANTHER		3	6431	4	31113	0.000466	4.1e-05	3.52531	0.029839	1
C_NC	PTHR21330	PANTHER		3	6431	3	31113	0.000466	0	inf	0.008828	1
C_NC	PTHR21340	PANTHER		2	6431	2	31113	0.000311	0	inf	0.042719	1
C_NC	PTHR21340:SF0	PANTHER		2	6431	2	31113	0.000311	0	inf	0.042719	1
C_NC	PTHR21354	PANTHER		5	6431	7	31113	0.000777	8.1e-05	3.26227	0.00543	0.9979
C_NC	PTHR21354:SF0	PANTHER		5	6431	7	31113	0.000777	8.1e-05	3.26227	0.00543	0.9979
C_NC	PTHR21496	PANTHER		3	6431	3	31113	0.000466	0	inf	0.008828	1
C_NC	PTHR21497	PANTHER		2	6431	2	31113	0.000311	0	inf	0.042719	1
C_NC	PTHR21497:SF25	PANTHER		2	6431	2	31113	0.000311	0	inf	0.042719	1
C_NC	PTHR21512	PANTHER		4	6431	4	31113	0.000622	0	inf	0.001824	0.874
C_NC	PTHR21512:SF11	PANTHER		4	6431	4	31113	0.000622	0	inf	0.001824	0.874
C_NC	PTHR21538	PANTHER		3	6431	4	31113	0.000466	4.1e-05	3.52531	0.029839	1
C_NC	PTHR21538:SF19	PANTHER		3	6431	4	31113	0.000466	4.1e-05	3.52531	0.029839	1
C_NC	PTHR21557	PANTHER		3	6431	3	31113	0.000466	0	inf	0.008828	1
C_NC	PTHR21557:SF2	PANTHER		3	6431	3	31113	0.000466	0	inf	0.008828	1
C_NC	PTHR21594	PANTHER		4	6431	4	31113	0.000622	0	inf	0.001824	0.874
C_NC	PTHR21614	PANTHER		4	6431	6	31113	0.000622	8.1e-05	2.94034	0.019094	1
C_NC	PTHR21616	PANTHER		3	6431	3	31113	0.000466	0	inf	0.008828	1
C_NC	PTHR21616:SF1	PANTHER		3	6431	3	31113	0.000466	0	inf	0.008828	1
C_NC	PTHR21706	PANTHER		3	6431	4	31113	0.000466	4.1e-05	3.52531	0.029839	1
C_NC	PTHR21711	PANTHER		3	6431	3	31113	0.000466	0	inf	0.008828	1
C_NC	PTHR21711:SF0	PANTHER		3	6431	3	31113	0.000466	0	inf	0.008828	1
C_NC	PTHR21713	PANTHER		4	6431	4	31113	0.000622	0	inf	0.001824	0.874
C_NC	PTHR21713:SF3	PANTHER		4	6431	4	31113	0.000622	0	inf	0.001824	0.874
C_NC	PTHR21725	PANTHER		4	6431	4	31113	0.000622	0	inf	0.001824	0.874
C_NC	PTHR22573	PANTHER		5	6431	9	31113	0.000777	0.000162	2.26227	0.022471	1
C_NC	PTHR22573:SF37	PANTHER		2	6431	2	31113	0.000311	0	inf	0.042719	1
C_NC	PTHR22573:SF43	PANTHER		2	6431	2	31113	0.000311	0	inf	0.042719	1
C_NC	PTHR22625	PANTHER		2	6431	2	31113	0.000311	0	inf	0.042719	1
C_NC	PTHR22625:SF7	PANTHER		2	6431	2	31113	0.000311	0	inf	0.042719	1
C_NC	PTHR22776:SF36	PANTHER		2	6431	2	31113	0.000311	0	inf	0.042719	1
C_NC	PTHR22793:SF1	PANTHER		2	6431	2	31113	0.000311	0	inf	0.042719	1
C_NC	PTHR22826:SF92	PANTHER		2	6431	2	31113	0.000311	0	inf	0.042719	1
C_NC	PTHR22835:SF127	PANTHER		4	6431	5	31113	0.000622	4.1e-05	3.94034	0.007613	0.9999
C_NC	PTHR22840	PANTHER		2	6431	2	31113	0.000311	0	inf	0.042719	1
C_NC	PTHR22875:SF7	PANTHER		4	6431	5	31113	0.000622	4.1e-05	3.94034	0.007613	0.9999
C_NC	PTHR22880:SF144	PANTHER		2	6431	2	31113	0.000311	0	inf	0.042719	1
C_NC	PTHR22883:SF14	PANTHER		2	6431	2	31113	0.000311	0	inf	0.042719	1
C_NC	PTHR22883:SF8	PANTHER		4	6431	6	31113	0.000622	8.1e-05	2.94034	0.019094	1
C_NC	PTHR22922	PANTHER		2	6431	2	31113	0.000311	0	inf	0.042719	1
C_NC	PTHR22922:SF5	PANTHER		2	6431	2	31113	0.000311	0	inf	0.042719	1
C_NC	PTHR22957:SF214	PANTHER		2	6431	2	31113	0.000311	0	inf	0.042719	1
C_NC	PTHR22957:SF220	PANTHER		2	6431	2	31113	0.000311	0	inf	0.042719	1
C_NC	PTHR22959	PANTHER		2	6431	2	31113	0.000311	0	inf	0.042719	1
C_NC	PTHR22959:SF0	PANTHER		2	6431	2	31113	0.000311	0	inf	0.042719	1
C_NC	PTHR22961	PANTHER		4	6431	7	31113	0.000622	0.000122	2.35538	0.037314	1
C_NC	PTHR22961:SF10	PANTHER		2	6431	2	31113	0.000311	0	inf	0.042719	1
C_NC	PTHR23036:SF5	PANTHER		2	6431	2	31113	0.000311	0	inf	0.042719	1
C_NC	PTHR23036:SF84	PANTHER		2	6431	2	31113	0.000311	0	inf	0.042719	1
C_NC	PTHR23068	PANTHER		2	6431	2	31113	0.000311	0	inf	0.042719	1
C_NC	PTHR23068:SF6	PANTHER		2	6431	2	31113	0.000311	0	inf	0.042719	1
C_NC	PTHR23086:SF35	PANTHER		2	6431	2	31113	0.000311	0	inf	0.042719	1
C_NC	PTHR23092	PANTHER		5	6431	9	31113	0.000777	0.000162	2.26227	0.022471	1
C_NC	PTHR23092:SF24	PANTHER		3	6431	3	31113	0.000466	0	inf	0.008828	1
C_NC	PTHR23104	PANTHER		2	6431	2	31113	0.000311	0	inf	0.042719	1
C_NC	PTHR23104:SF5	PANTHER		2	6431	2	31113	0.000311	0	inf	0.042719	1
C_NC	PTHR23107:SF2	PANTHER		7	6431	8	31113	0.001088	4.1e-05	4.7477	0.000105	0.1366
C_NC	PTHR23138:SF8	PANTHER		3	6431	3	31113	0.000466	0	inf	0.008828	1
C_NC	PTHR23152	PANTHER		2	6431	2	31113	0.000311	0	inf	0.042719	1
C_NC	PTHR23152:SF7	PANTHER		2	6431	2	31113	0.000311	0	inf	0.042719	1
C_NC	PTHR23180:SF232	PANTHER		5	6431	5	31113	0.000777	0	inf	0.000377	0.3533
C_NC	PTHR23182	PANTHER		3	6431	4	31113	0.000466	4.1e-05	3.52531	0.029839	1
C_NC	PTHR23182:SF5	PANTHER		3	6431	4	31113	0.000466	4.1e-05	3.52531	0.029839	1
C_NC	PTHR23186:SF2	PANTHER		2	6431	2	31113	0.000311	0	inf	0.042719	1
C_NC	PTHR23195:SF14	PANTHER		3	6431	3	31113	0.000466	0	inf	0.008828	1
C_NC	PTHR23204:SF2	PANTHER		2	6431	2	31113	0.000311	0	inf	0.042719	1
C_NC	PTHR23223:SF142	PANTHER		3	6431	3	31113	0.000466	0	inf	0.008828	1
C_NC	PTHR23223:SF146	PANTHER		2	6431	2	31113	0.000311	0	inf	0.042719	1
C_NC	PTHR23226:SF56	PANTHER		2	6431	2	31113	0.000311	0	inf	0.042719	1
C_NC	PTHR23228:SF56	PANTHER		4	6431	5	31113	0.000622	4.1e-05	3.94034	0.007613	0.9999
C_NC	PTHR23228:SF8	PANTHER		2	6431	2	31113	0.000311	0	inf	0.042719	1
C_NC	PTHR23229:SF93	PANTHER		3	6431	3	31113	0.000466	0	inf	0.008828	1
C_NC	PTHR23232	PANTHER		5	6431	9	31113	0.000777	0.000162	2.26227	0.022471	1
C_NC	PTHR23232:SF47	PANTHER		5	6431	9	31113	0.000777	0.000162	2.26227	0.022471	1
C_NC	PTHR23244	PANTHER		5	6431	8	31113	0.000777	0.000122	2.67731	0.012018	1
C_NC	PTHR23244:SF266	PANTHER		2	6431	2	31113	0.000311	0	inf	0.042719	1
C_NC	PTHR23280:SF17	PANTHER		6	6431	6	31113	0.000933	0	inf	7.8e-05	0.1192
C_NC	PTHR23280:SF7	PANTHER		2	6431	2	31113	0.000311	0	inf	0.042719	1
C_NC	PTHR23288:SF9	PANTHER		2	6431	2	31113	0.000311	0	inf	0.042719	1
C_NC	PTHR23341	PANTHER		3	6431	3	31113	0.000466	0	inf	0.008828	1
C_NC	PTHR23341:SF1	PANTHER		3	6431	3	31113	0.000466	0	inf	0.008828	1
C_NC	PTHR23348	PANTHER		2	6431	2	31113	0.000311	0	inf	0.042719	1
C_NC	PTHR23348:SF40	PANTHER		2	6431	2	31113	0.000311	0	inf	0.042719	1
C_NC	PTHR23408	PANTHER		4	6431	6	31113	0.000622	8.1e-05	2.94034	0.019094	1
C_NC	PTHR23408:SF3	PANTHER		4	6431	6	31113	0.000622	8.1e-05	2.94034	0.019094	1
C_NC	PTHR23423:SF20	PANTHER		3	6431	4	31113	0.000466	4.1e-05	3.52531	0.029839	1
C_NC	PTHR23429	PANTHER		3	6431	4	31113	0.000466	4.1e-05	3.52531	0.029839	1
C_NC	PTHR23429:SF2	PANTHER		3	6431	4	31113	0.000466	4.1e-05	3.52531	0.029839	1
C_NC	PTHR24006:SF392	PANTHER		2	6431	2	31113	0.000311	0	inf	0.042719	1
C_NC	PTHR24006:SF409	PANTHER		4	6431	6	31113	0.000622	8.1e-05	2.94034	0.019094	1
C_NC	PTHR24012	PANTHER		5	6431	8	31113	0.000777	0.000122	2.67731	0.012018	1
C_NC	PTHR24012:SF324	PANTHER		3	6431	3	31113	0.000466	0	inf	0.008828	1
C_NC	PTHR24023:SF390	PANTHER		2	6431	2	31113	0.000311	0	inf	0.042719	1
C_NC	PTHR24057	PANTHER		2	6431	2	31113	0.000311	0	inf	0.042719	1
C_NC	PTHR24058:SF29	PANTHER		2	6431	2	31113	0.000311	0	inf	0.042719	1
C_NC	PTHR24067:SF54	PANTHER		4	6431	5	31113	0.000622	4.1e-05	3.94034	0.007613	0.9999
C_NC	PTHR24073:SF421	PANTHER		4	6431	4	31113	0.000622	0	inf	0.001824	0.874
C_NC	PTHR24078:SF15	PANTHER		2	6431	2	31113	0.000311	0	inf	0.042719	1
C_NC	PTHR24203:SF11	PANTHER		2	6431	2	31113	0.000311	0	inf	0.042719	1
C_NC	PTHR24300:SF13	PANTHER		5	6431	5	31113	0.000777	0	inf	0.000377	0.3533
C_NC	PTHR24346:SF1	PANTHER		2	6431	2	31113	0.000311	0	inf	0.042719	1
C_NC	PTHR24347:SF178	PANTHER		4	6431	4	31113	0.000622	0	inf	0.001824	0.874
C_NC	PTHR24357:SF65	PANTHER		4	6431	4	31113	0.000622	0	inf	0.001824	0.874
C_NC	PTHR24379	PANTHER		4	6431	6	31113	0.000622	8.1e-05	2.94034	0.019094	1
C_NC	PTHR24379:SF21	PANTHER		4	6431	6	31113	0.000622	8.1e-05	2.94034	0.019094	1
C_NC	PTHR24385:SF48	PANTHER		2	6431	2	31113	0.000311	0	inf	0.042719	1
C_NC	PTHR24402:SF13	PANTHER		2	6431	2	31113	0.000311	0	inf	0.042719	1
C_NC	PTHR24403	PANTHER		3	6431	3	31113	0.000466	0	inf	0.008828	1
C_NC	PTHR24403:SF27	PANTHER		3	6431	3	31113	0.000466	0	inf	0.008828	1
C_NC	PTHR24412:SF11	PANTHER		2	6431	2	31113	0.000311	0	inf	0.042719	1
C_NC	PTHR24412:SF162	PANTHER		2	6431	2	31113	0.000311	0	inf	0.042719	1
C_NC	PTHR24412:SF168	PANTHER		4	6431	4	31113	0.000622	0	inf	0.001824	0.874
C_NC	PTHR24418:SF66	PANTHER		7	6431	9	31113	0.001088	8.1e-05	3.7477	0.000389	0.3601
C_NC	PTHR31056	PANTHER		4	6431	7	31113	0.000622	0.000122	2.35538	0.037314	1
C_NC	PTHR31056:SF1	PANTHER		4	6431	7	31113	0.000622	0.000122	2.35538	0.037314	1
C_NC	PTHR31220	PANTHER		2	6431	2	31113	0.000311	0	inf	0.042719	1
C_NC	PTHR31220:SF4	PANTHER		2	6431	2	31113	0.000311	0	inf	0.042719	1
C_NC	PTHR31281	PANTHER		2	6431	2	31113	0.000311	0	inf	0.042719	1
C_NC	PTHR31281:SF2	PANTHER		2	6431	2	31113	0.000311	0	inf	0.042719	1
C_NC	PTHR31423	PANTHER		2	6431	2	31113	0.000311	0	inf	0.042719	1
C_NC	PTHR31573	PANTHER		2	6431	2	31113	0.000311	0	inf	0.042719	1
C_NC	PTHR31573:SF1	PANTHER		2	6431	2	31113	0.000311	0	inf	0.042719	1
C_NC	PTHR31804	PANTHER		2	6431	2	31113	0.000311	0	inf	0.042719	1
C_NC	PTHR31817:SF3	PANTHER		4	6431	6	31113	0.000622	8.1e-05	2.94034	0.019094	1
C_NC	PTHR31968	PANTHER		4	6431	6	31113	0.000622	8.1e-05	2.94034	0.019094	1
C_NC	PTHR32267	PANTHER		2	6431	2	31113	0.000311	0	inf	0.042719	1
C_NC	PTHR32341	PANTHER		5	6431	9	31113	0.000777	0.000162	2.26227	0.022471	1
C_NC	SM00004	Smart	Notch domain	2	6431	2	31113	0.000311	0	inf	0.042719	1
C_NC	SM00021	Smart	DIX domain	3	6431	3	31113	0.000466	0	inf	0.008828	1
C_NC	SM00038	Smart	Fibrillar collagen, C-terminal	2	6431	2	31113	0.000311	0	inf	0.042719	1
C_NC	SM00078	Smart	Insulin-like	5	6431	9	31113	0.000777	0.000162	2.26227	0.022471	1
C_NC	SM00092	Smart	Ribonuclease A-domain	2	6431	2	31113	0.000311	0	inf	0.042719	1
C_NC	SM00147	Smart	Ras guanine-nucleotide exchange factors catalytic domain	5	6431	8	31113	0.000777	0.000122	2.67731	0.012018	1
C_NC	SM00240	Smart	Forkhead-associated (FHA) domain	3	6431	4	31113	0.000466	4.1e-05	3.52531	0.029839	1
C_NC	SM00259	Smart	Zinc finger, A20-type	5	6431	9	31113	0.000777	0.000162	2.26227	0.022471	1
C_NC	SM00261	Smart	Furin-like repeat	7	6431	9	31113	0.001088	8.1e-05	3.7477	0.000389	0.3601
C_NC	SM00281	Smart	Laminin IV	3	6431	4	31113	0.000466	4.1e-05	3.52531	0.029839	1
C_NC	SM00293	Smart	PWWP domain	4	6431	7	31113	0.000622	0.000122	2.35538	0.037314	1
C_NC	SM00307	Smart	I/LWEQ domain	2	6431	2	31113	0.000311	0	inf	0.042719	1
C_NC	SM00314	Smart	Ras-associating (RA) domain	4	6431	6	31113	0.000622	8.1e-05	2.94034	0.019094	1
C_NC	SM00391	Smart	Methyl-CpG DNA binding	6	6431	6	31113	0.000933	0	inf	7.8e-05	0.1192
C_NC	SM00439	Smart	Bromo adjacent homology (BAH) domain	3	6431	3	31113	0.000466	0	inf	0.008828	1
C_NC	SM00442	Smart	Fibroblast growth factor family	5	6431	9	31113	0.000777	0.000162	2.26227	0.022471	1
C_NC	SM00547	Smart	Zinc finger, RanBP2-type	3	6431	3	31113	0.000466	0	inf	0.008828	1
C_NC	SM00568	Smart	GRAM domain	4	6431	6	31113	0.000622	8.1e-05	2.94034	0.019094	1
C_NC	SM00742	Smart	HR1 rho-binding repeat	3	6431	4	31113	0.000466	4.1e-05	3.52531	0.029839	1
C_NC	SM00755	Smart	GRIP	4	6431	5	31113	0.000622	4.1e-05	3.94034	0.007613	0.9999
C_NC	SM01020	Smart	Beta-adaptin appendage, C-terminal subdomain	7	6431	7	31113	0.001088	0	inf	1.6e-05	0.0431
C_NC	SSF47220	Superfamily	Vinculin/alpha-catenin	5	6431	9	31113	0.000777	0.000162	2.26227	0.022471	1
C_NC	SSF47587	Superfamily	Poly(ADP-ribose) polymerase, regulatory domain	2	6431	2	31113	0.000311	0	inf	0.042719	1
C_NC	SSF50022	Superfamily	Rieske [2Fe-2S] iron-sulphur domain	3	6431	3	31113	0.000466	0	inf	0.008828	1
C_NC	SSF52440	Superfamily	Pre-ATP-grasp domain	3	6431	3	31113	0.000466	0	inf	0.008828	1
C_NC	SSF52935	Superfamily	Pyruvate kinase, C-terminal	2	6431	2	31113	0.000311	0	inf	0.042719	1
C_NC	SSF54076	Superfamily	Ribonuclease A-domain	2	6431	2	31113	0.000311	0	inf	0.042719	1
C_NC	SSF54171	Superfamily	DNA-binding domain	7	6431	7	31113	0.001088	0	inf	1.6e-05	0.0431
C_NC	SSF54631	Superfamily		6	6431	9	31113	0.000933	0.000122	2.94034	0.003655	0.981
C_NC	SSF55781	Superfamily	GAF domain-like	2	6431	2	31113	0.000311	0	inf	0.042719	1
C_NC	SSF55826	Superfamily	YbaK/aminoacyl-tRNA synthetase-associated domain	2	6431	2	31113	0.000311	0	inf	0.042719	1
C_NC	SSF56968	Superfamily	Lipid transport protein, beta-sheet shell	3	6431	3	31113	0.000466	0	inf	0.008828	1
C_NC	SSF56994	Superfamily	Insulin-like	5	6431	9	31113	0.000777	0.000162	2.26227	0.022471	1
C_NC	SSF68993	Superfamily	Focal adhesion kinase, targeting (FAT) domain	2	6431	2	31113	0.000311	0	inf	0.042719	1
C_NC	SSF81585	Superfamily		4	6431	7	31113	0.000622	0.000122	2.35538	0.037314	1
C_NC	SSF89360	Superfamily	FeS cluster biogenesis	2	6431	2	31113	0.000311	0	inf	0.042719	1
C_NC	SSF90209	Superfamily	Zinc finger, RanBP2-type	3	6431	3	31113	0.000466	0	inf	0.008828	1
C_NC	TIGR00039	TIGRfam	6-pyruvoyl tetrahydropterin synthase/QueD family protein	6	6431	8	31113	0.000933	8.1e-05	3.52531	0.001478	0.8118
C_NC	TIGR00049	TIGRfam	FeS cluster insertion protein	2	6431	2	31113	0.000311	0	inf	0.042719	1
C_NC	TIGR00052	TIGRfam	Nucleoside diphosphate pyrophosphatase	2	6431	2	31113	0.000311	0	inf	0.042719	1
C_NC	TIGR00177	TIGRfam	MoaB/Mog domain	2	6431	2	31113	0.000311	0	inf	0.042719	1
C_NC	TIGR00537	TIGRfam	Eukaryotic/archaeal PrmC-related	2	6431	2	31113	0.000311	0	inf	0.042719	1
C_NC	TIGR01064	TIGRfam	Pyruvate kinase	2	6431	2	31113	0.000311	0	inf	0.042719	1
C_NC	TIGR01313	TIGRfam	Carbohydrate kinase, thermoresistant glucokinase	4	6431	6	31113	0.000622	8.1e-05	2.94034	0.019094	1
C_NC	TIGR01513	TIGRfam	Nicotinate phosphoribosyltransferase pncB-type	2	6431	2	31113	0.000311	0	inf	0.042719	1
C_NC	TIGR01645	TIGRfam	Poly-U binding splicing factor, half-pint	2	6431	2	31113	0.000311	0	inf	0.042719	1
C_NC	TIGR01777	TIGRfam	Epimerase family protein SDR39U1	3	6431	4	31113	0.000466	4.1e-05	3.52531	0.029839	1

## Sheet: C_CN_filtered
Groups	Pro_Feat	PF_Type	PF_Desc	x	k	N	M	x/k	(N-x)/(M-k)	log2(R+/R-)	P_value	Bon(P_value)	E(P_value)	Juncs
C_NC	PF09738	Pfam	Leucine-rich repeat flightless-interacting protein	17	2600	23	11023	0.006538	0.000712	3.19832	0	0.001466	0
C_NC	PS50099	Prosite_profiles		106	2600	279	11023	0.040769	0.020539	0.989115	0	0.00019	0
C_NC	PS50324	Prosite_profiles		69	2600	151	11023	0.026538	0.009735	1.4468	0	9e-06	0
C_NC	SSF56399	Superfamily		11	2600	11	11023	0.004231	0	inf	0	0.000387	0
C_NC	Seg	low_complexity		1022	2600	3460	11023	0.393077	0.289446	0.44152	0	0	0
C_NC	ncoils	coiled_coil		274	2600	853	11023	0.105385	0.06874	0.616435	0	1.1e-05	0
C_NC	Sigp	signal_peptide		39	2600	314	11023	0.015	0.032649	-1.12206	1e-06	0.002173	0
C_NC	PR01217	Prints		44	2600	96	11023	0.016923	0.006174	1.45481	2e-06	0.004775	0
C_NC	SSF52540	Superfamily	P-loop containing nucleoside triphosphate hydrolase	22	2600	201	11023	0.008462	0.021251	-1.32856	7e-06	0.022145	0
C_NC	PF00644	Pfam	Poly(ADP-ribose) polymerase, catalytic domain	7	2600	7	11023	0.002692	0	inf	4e-05	0.12635	0.002
C_NC	PF04201	Pfam	Tumour protein D52	7	2600	7	11023	0.002692	0	inf	4e-05	0.12635	0.002
C_NC	PS51059	Prosite_profiles	Poly(ADP-ribose) polymerase, catalytic domain	7	2600	7	11023	0.002692	0	inf	4e-05	0.12635	0.002
C_NC	SSF47220	Superfamily	Vinculin/alpha-catenin	7	2600	7	11023	0.002692	0	inf	4e-05	0.12635	0.002
C_NC	PS50322	Prosite_profiles		35	2600	79	11023	0.013462	0.005224	1.36567	4.8e-05	0.148926	0.003
C_NC	PR01253	Prints	Amphiphysin, isoform 2	11	2600	15	11023	0.004231	0.000475	3.15525	6.4e-05	0.20079	0.006
C_NC	PR00465	Prints	Cytochrome P450, E-class, group IV	2	2600	53	11023	0.000769	0.006055	-2.9766	0.000138	0.433444	0.026
C_NC	SM00361	Smart	RNA recognition motif domain, eukaryote	6	2600	6	11023	0.002308	0	inf	0.000171	0.536623	0.033
C_NC	PR00463	Prints	Cytochrome P450, E-class, group I	3	2600	61	11023	0.001154	0.006886	-2.5772	0.000196	0.613444	0.037
C_NC	SSF52833	Superfamily	Thioredoxin-like fold	11	2600	114	11023	0.004231	0.012228	-1.53125	0.000211	0.659308	0.04
C_NC	SSF51735	Superfamily		2	2600	51	11023	0.000769	0.005817	-2.91889	0.000213	0.666429	0.041
C_NC	PS50831	Prosite_profiles	Sorbin-like	9	2600	12	11023	0.003462	0.000356	3.28078	0.000241	0.755788	0.047
C_NC	SSF90229	Superfamily		9	2600	12	11023	0.003462	0.000356	3.28078	0.000241	0.755788	0.047
C_NC	PF00025	Pfam	Small GTPase superfamily, ARF/SAR type	8	2600	93	11023	0.003077	0.010091	-1.71357	0.000306	0.958979	0.058
C_NC	SSF48264	Superfamily	Cytochrome P450	2	2600	48	11023	0.000769	0.005461	-2.82774	0.000492	1.53972	0.09
C_NC	PF02453	Pfam	Reticulon	9	2600	13	11023	0.003462	0.000475	2.86575	0.00062	1.94053	0.103
C_NC	PF01754	Pfam	Zinc finger, A20-type	5	2600	5	11023	0.001923	0	inf	0.000728	2.27842	0.111
C_NC	PR01597	Prints	Zona occludens protein	5	2600	5	11023	0.001923	0	inf	0.000728	2.27842	0.111
C_NC	SM00150	Smart	Spectrin/alpha-actinin	11	2600	18	11023	0.004231	0.000831	2.3479	0.000728	2.27859	0.111
C_NC	SM00259	Smart	Zinc finger, A20-type	5	2600	5	11023	0.001923	0	inf	0.000728	2.27842	0.111
C_NC	PF00067	Pfam	Cytochrome P450	2	2600	47	11023	0.000769	0.005343	-2.79603	0.000779	2.43728	0.116
C_NC	PF12424	Pfam	Calcium transporting P-type ATPase, C-terminal, plasma membrane	7	2600	9	11023	0.002692	0.000237	3.50318	0.000917	2.87089	0.139
C_NC	PF00061	Pfam	Lipocalin/cytosolic fatty-acid binding domain	0	2600	27	11023	0	0.003206	-inf	0.001033	3.23253	0.17
C_NC	PF00435	Pfam	Spectrin repeat	9	2600	14	11023	0.003462	0.000594	2.54382	0.001373	4.29596	0.208
C_NC	PF00595	Pfam	PDZ domain	21	2600	47	11023	0.008077	0.003087	1.3877	0.001534	4.80016	0.225
C_NC	TIGR00231	TIGRfam	Small GTP-binding protein domain	9	2600	90	11023	0.003462	0.009617	-1.4741	0.001617	5.06104	0.23
C_NC	Tmhmm	transmembrane		198	2600	1007	11023	0.076154	0.096047	-0.334817	0.001837	5.74935	0.282
C_NC	SM00228	Smart	PDZ domain	22	2600	51	11023	0.008462	0.003443	1.29727	0.002381	7.45272	0.38
C_NC	PF08477	Pfam	Mitochondrial Rho-like	7	2600	75	11023	0.002692	0.008073	-1.58428	0.002394	7.49192	0.38
C_NC	SM00356	Smart	Zinc finger, CCCH-type	7	2600	10	11023	0.002692	0.000356	2.91822	0.002433	7.61492	0.385
C_NC	SSF50156	Superfamily	PDZ domain	24	2600	57	11023	0.009231	0.003918	1.23639	0.002463	7.71032	0.388
C_NC	PR00179	Prints	Lipocalin	0	2600	23	11023	0	0.002731	-inf	0.00272	8.51461	0.406
C_NC	PF01352	Pfam	Krueppel-associated box	6	2600	8	11023	0.002308	0.000237	3.28078	0.003062	9.5852	0.421
C_NC	PF02208	Pfam	Sorbin-like	6	2600	8	11023	0.002308	0.000237	3.28078	0.003062	9.5852	0.421
C_NC	SM00459	Smart	Sorbin-like	6	2600	8	11023	0.002308	0.000237	3.28078	0.003062	9.5852	0.421
C_NC	PF01885	Pfam	Phosphotransferase KptA/Tpt1	4	2600	4	11023	0.001538	0	inf	0.00309	9.67102	0.423
C_NC	PF02114	Pfam	Phosducin, thioredoxin-like domain	4	2600	4	11023	0.001538	0	inf	0.00309	9.67102	0.423
C_NC	PF02966	Pfam	mRNA splicing factor, thioredoxin-like U5 snRNP	4	2600	4	11023	0.001538	0	inf	0.00309	9.67102	0.423
C_NC	PF06583	Pfam	Neogenin, C-terminal	4	2600	4	11023	0.001538	0	inf	0.00309	9.67102	0.423
C_NC	PR00806	Prints	Vinculin	4	2600	4	11023	0.001538	0	inf	0.00309	9.67102	0.423
C_NC	PS50158	Prosite_profiles	Zinc finger, CCHC-type	4	2600	4	11023	0.001538	0	inf	0.00309	9.67102	0.423
C_NC	SSF51206	Superfamily	Cyclic nucleotide-binding-like	4	2600	4	11023	0.001538	0	inf	0.00309	9.67102	0.423
C_NC	SSF57756	Superfamily	Zinc finger, CCHC-type	4	2600	4	11023	0.001538	0	inf	0.00309	9.67102	0.423
C_NC	SM00174	Smart	Small GTPase superfamily, Rho type	6	2600	66	11023	0.002308	0.007123	-1.62611	0.00342	10.7039	0.485
C_NC	PF09379	Pfam	FERM, N-terminal	5	2600	6	11023	0.001923	0.000119	4.01775	0.00351	10.9874	0.502
C_NC	PF12605	Pfam	Casein kinase 1 gamma C-terminal	5	2600	6	11023	0.001923	0.000119	4.01775	0.00351	10.9874	0.502
C_NC	PR01848	Prints	U2 auxiliary factor small subunit	5	2600	6	11023	0.001923	0.000119	4.01775	0.00351	10.9874	0.502
C_NC	PS50330	Prosite_profiles	Ubiquitin interacting motif	5	2600	6	11023	0.001923	0.000119	4.01775	0.00351	10.9874	0.502
C_NC	PF00071	Pfam	Small GTPase superfamily	9	2600	84	11023	0.003462	0.008904	-1.36307	0.00418	13.0821	0.641
C_NC	SSF103473	Superfamily	Major facilitator superfamily domain, general substrate transporter	0	2600	22	11023	0	0.002612	-inf	0.004337	13.5761	0.656
C_NC	SSF46966	Superfamily		15	2600	32	11023	0.005769	0.002018	1.51525	0.005227	16.3607	0.678
C_NC	PS50845	Prosite_profiles	Reticulon	7	2600	11	11023	0.002692	0.000475	2.50318	0.00533	16.6825	0.681
C_NC	SM00349	Smart	Krueppel-associated box	7	2600	11	11023	0.002692	0.000475	2.50318	0.00533	16.6825	0.681
C_NC	SSF109640	Superfamily	Krueppel-associated box	7	2600	11	11023	0.002692	0.000475	2.50318	0.00533	16.6825	0.681
C_NC	PS50313	Prosite_profiles		38	2600	108	11023	0.014615	0.008311	0.814467	0.006055	18.9533	0.713
C_NC	PR00385	Prints	Cytochrome P450	2	2600	38	11023	0.000769	0.004274	-2.4741	0.00615	19.2509	0.723
C_NC	SM00173	Smart	Small GTPase superfamily, Ras type	7	2600	69	11023	0.002692	0.007361	-1.45102	0.006469	20.2467	0.763
C_NC	PF01391	Pfam	Collagen triple helix repeat	0	2600	20	11023	0	0.002374	-inf	0.006966	21.8051	0.792
C_NC	PS50021	Prosite_profiles	Calponin homology domain	13	2600	28	11023	0.005	0.001781	1.48937	0.007208	22.5607	0.821
C_NC	PF02187	Pfam	Growth-arrest-specific protein 2 domain	6	2600	9	11023	0.002308	0.000356	2.69582	0.007353	23.0138	0.839
C_NC	PF06546	Pfam	Vertebrate heat shock transcription factor, C-terminal domain	6	2600	9	11023	0.002308	0.000356	2.69582	0.007353	23.0138	0.839
C_NC	PR00203	Prints	Amyloidogenic glycoprotein	6	2600	9	11023	0.002308	0.000356	2.69582	0.007353	23.0138	0.839
C_NC	PS50805	Prosite_profiles	Krueppel-associated box	6	2600	9	11023	0.002308	0.000356	2.69582	0.007353	23.0138	0.839
C_NC	SM00133	Smart	AGC-kinase, C-terminal	6	2600	9	11023	0.002308	0.000356	2.69582	0.007353	23.0138	0.839
C_NC	SM00243	Smart	Growth-arrest-specific protein 2 domain	6	2600	9	11023	0.002308	0.000356	2.69582	0.007353	23.0138	0.839
C_NC	SSF143575	Superfamily	Growth-arrest-specific protein 2 domain	6	2600	9	11023	0.002308	0.000356	2.69582	0.007353	23.0138	0.839
C_NC	SSF54160	Superfamily	Chromo domain-like	6	2600	9	11023	0.002308	0.000356	2.69582	0.007353	23.0138	0.839
C_NC	PS50106	Prosite_profiles	PDZ domain	21	2600	52	11023	0.008077	0.00368	1.13394	0.007838	24.532	0.91
C_NC	PS50323	Prosite_profiles		14	2600	30	11023	0.005385	0.0019	1.50318	0.007843	24.547	0.91
C_NC	SM00175	Smart	Small GTPase superfamily, Rab type	8	2600	73	11023	0.003077	0.007717	-1.32655	0.008359	26.1637	0.924
C_NC	PF00313	Pfam	Cold-shock protein, DNA-binding	5	2600	7	11023	0.001923	0.000237	3.01775	0.009891	30.9604	0.935
C_NC	SM00357	Smart	Cold shock protein	5	2600	7	11023	0.001923	0.000237	3.01775	0.009891	30.9604	0.935
C_NC	SSF57889	Superfamily		5	2600	7	11023	0.001923	0.000237	3.01775	0.009891	30.9604	0.935
C_NC	PF00036	Pfam	EF-hand domain	1	2600	27	11023	0.000385	0.003087	-3.00462	0.01104	34.5548	0.943
C_NC	SSF51905	Superfamily		1	2600	27	11023	0.000385	0.003087	-3.00462	0.01104	34.5548	0.943
C_NC	PR01221	Prints	Major urinary protein	0	2600	18	11023	0	0.002137	-inf	0.011276	35.2927	0.945
C_NC	PR01785	Prints	Arylesterase	0	2600	18	11023	0	0.002137	-inf	0.011276	35.2927	0.945
C_NC	SSF47616	Superfamily	Glutathione S-transferase, C-terminal-like	0	2600	18	11023	0	0.002137	-inf	0.011276	35.2927	0.945
C_NC	PS50325	Prosite_profiles		11	2600	23	11023	0.004231	0.001425	1.57029	0.011477	35.9217	0.949
C_NC	PR01215	Prints	Alpha-1-microglobulin	0	2600	19	11023	0	0.002256	-inf	0.011708	36.6449	0.958
C_NC	SSF46785	Superfamily		1	2600	28	11023	0.000385	0.003206	-3.05906	0.011801	36.9379	0.959
C_NC	PF00642	Pfam	Zinc finger, CCCH-type	4	2600	5	11023	0.001538	0.000119	3.69582	0.012537	39.2414	0.97
C_NC	PF00459	Pfam	Inositol monophosphatase	3	2600	3	11023	0.001154	0	inf	0.013111	41.0376	0.982
C_NC	PF00994	Pfam	Molybdopterin binding domain	3	2600	3	11023	0.001154	0	inf	0.013111	41.0376	0.982
C_NC	PF01299	Pfam	Lysosome-associated membrane glycoprotein	3	2600	3	11023	0.001154	0	inf	0.013111	41.0376	0.982
C_NC	PF02065	Pfam	Glycoside hydrolase, clan GH-D	3	2600	3	11023	0.001154	0	inf	0.013111	41.0376	0.982
C_NC	PF02354	Pfam	GPCR, family 2, latrophilin, C-terminal	3	2600	3	11023	0.001154	0	inf	0.013111	41.0376	0.982
C_NC	PF02755	Pfam	RPEL repeat	3	2600	3	11023	0.001154	0	inf	0.013111	41.0376	0.982
C_NC	PF02841	Pfam	Guanylate-binding protein, C-terminal	3	2600	3	11023	0.001154	0	inf	0.013111	41.0376	0.982
C_NC	PF03178	Pfam	Cleavage/polyadenylation specificity factor, A subunit, C-terminal	3	2600	3	11023	0.001154	0	inf	0.013111	41.0376	0.982
C_NC	PF03366	Pfam	YEATS	3	2600	3	11023	0.001154	0	inf	0.013111	41.0376	0.982
C_NC	PF03494	Pfam	Amyloidogenic glycoprotein, amyloid-beta peptide	3	2600	3	11023	0.001154	0	inf	0.013111	41.0376	0.982
C_NC	PF04503	Pfam		3	2600	3	11023	0.001154	0	inf	0.013111	41.0376	0.982
C_NC	PF04847	Pfam	Calcipressin	3	2600	3	11023	0.001154	0	inf	0.013111	41.0376	0.982
C_NC	PF06428	Pfam	GDPGTP exchange factor Sec2p	3	2600	3	11023	0.001154	0	inf	0.013111	41.0376	0.982
C_NC	PF08726	Pfam	EF-hand, Ca insensitive	3	2600	3	11023	0.001154	0	inf	0.013111	41.0376	0.982
C_NC	PF08776	Pfam	VASP tetramerisation	3	2600	3	11023	0.001154	0	inf	0.013111	41.0376	0.982
C_NC	PF11232	Pfam	Mediator complex, subunit Med25, PTOV activation and synapsin 2	3	2600	3	11023	0.001154	0	inf	0.013111	41.0376	0.982
C_NC	PF11555	Pfam	EGFR receptor inhibitor Mig-6	3	2600	3	11023	0.001154	0	inf	0.013111	41.0376	0.982
C_NC	PF12066	Pfam	Protein of unknown function DUF3546	3	2600	3	11023	0.001154	0	inf	0.013111	41.0376	0.982
C_NC	PF12301	Pfam	CD99 antigen-like protein 2	3	2600	3	11023	0.001154	0	inf	0.013111	41.0376	0.982
C_NC	PF12352	Pfam		3	2600	3	11023	0.001154	0	inf	0.013111	41.0376	0.982
C_NC	PF12490	Pfam	Breast carcinoma amplified sequence 3	3	2600	3	11023	0.001154	0	inf	0.013111	41.0376	0.982
C_NC	PR00014	Prints		3	2600	3	11023	0.001154	0	inf	0.013111	41.0376	0.982
C_NC	PR00126	Prints	ATPase, F1 complex, gamma subunit	3	2600	3	11023	0.001154	0	inf	0.013111	41.0376	0.982
C_NC	PR00204	Prints	Amyloidogenic glycoprotein, amyloid-beta peptide	3	2600	3	11023	0.001154	0	inf	0.013111	41.0376	0.982
C_NC	PR00336	Prints	Lysosome-associated membrane glycoprotein	3	2600	3	11023	0.001154	0	inf	0.013111	41.0376	0.982
C_NC	PR00500	Prints	Polycystic kidney disease type 1 protein	3	2600	3	11023	0.001154	0	inf	0.013111	41.0376	0.982
C_NC	PR00740	Prints	Glycoside hydrolase, family 27	3	2600	3	11023	0.001154	0	inf	0.013111	41.0376	0.982
C_NC	PR01599	Prints	Zona occludens protein ZO-2	3	2600	3	11023	0.001154	0	inf	0.013111	41.0376	0.982
C_NC	SM00852	Smart	Molybdopterin binding domain	3	2600	3	11023	0.001154	0	inf	0.013111	41.0376	0.982
C_NC	SSF48340	Superfamily	Guanylate-binding protein, C-terminal	3	2600	3	11023	0.001154	0	inf	0.013111	41.0376	0.982
C_NC	SSF53218	Superfamily	Molybdopterin binding domain	3	2600	3	11023	0.001154	0	inf	0.013111	41.0376	0.982
C_NC	SSF54913	Superfamily	Nitrogen regulatory PII-like, alpha/beta	3	2600	3	11023	0.001154	0	inf	0.013111	41.0376	0.982
C_NC	TIGR00177	TIGRfam	Molybdenum cofactor synthesis	3	2600	3	11023	0.001154	0	inf	0.013111	41.0376	0.982
C_NC	SSF103657	Superfamily		10	2600	20	11023	0.003846	0.001187	1.69582	0.013614	42.6113	0.984
C_NC	SM00409	Smart	Immunoglobulin subtype	12	2600	93	11023	0.004615	0.009617	-1.05906	0.013718	42.9388	0.984
C_NC	PF00307	Pfam	Calponin homology domain	13	2600	30	11023	0.005	0.002018	1.3088	0.016433	51.4338	0.997
C_NC	PF04670	Pfam	Gtr1/RagA G protein	6	2600	57	11023	0.002308	0.006055	-1.39164	0.018278	57.2092	0.997
C_NC	PF04908	Pfam	SH3-binding, glutamic acid-rich protein	0	2600	16	11023	0	0.0019	-inf	0.01838	57.5301	0.997
C_NC	PR00312	Prints	Calsequestrin	0	2600	16	11023	0	0.0019	-inf	0.01838	57.5301	0.997
C_NC	PR01173	Prints	Odour-binding protein	0	2600	16	11023	0	0.0019	-inf	0.01838	57.5301	0.997
C_NC	PR01254	Prints	Prostaglandin D synthase	0	2600	16	11023	0	0.0019	-inf	0.01838	57.5301	0.997
C_NC	SSF54403	Superfamily		0	2600	16	11023	0	0.0019	-inf	0.01838	57.5301	0.997
C_NC	SSF63829	Superfamily		0	2600	16	11023	0	0.0019	-inf	0.01838	57.5301	0.997
C_NC	PF00335	Pfam	Tetraspanin/Peripherin	0	2600	17	11023	0	0.002018	-inf	0.018564	58.1044	0.997
C_NC	SM00033	Smart	Calponin homology domain	12	2600	27	11023	0.004615	0.001781	1.37389	0.0201	62.9119	0.998
C_NC	PF00130	Pfam	Protein kinase C-like, phorbol ester/diacylglycerol-binding domain	5	2600	8	11023	0.001923	0.000356	2.43279	0.021273	66.5857	1
C_NC	PF03114	Pfam	BAR domain	5	2600	8	11023	0.001923	0.000356	2.43279	0.021273	66.5857	1
C_NC	PS50081	Prosite_profiles	Protein kinase C-like, phorbol ester/diacylglycerol-binding domain	5	2600	8	11023	0.001923	0.000356	2.43279	0.021273	66.5857	1
C_NC	PS51036	Prosite_profiles	Zinc finger, A20-type	5	2600	8	11023	0.001923	0.000356	2.43279	0.021273	66.5857	1
C_NC	SM00735	Smart	ZASP	5	2600	8	11023	0.001923	0.000356	2.43279	0.021273	66.5857	1
C_NC	PS50020	Prosite_profiles	WW domain	9	2600	19	11023	0.003462	0.001187	1.54382	0.025823	80.8268	1
C_NC	SSF51045	Superfamily	WW domain	9	2600	19	11023	0.003462	0.001187	1.54382	0.025823	80.8268	1
C_NC	PF00079	Pfam	Serpin domain	1	2600	23	11023	0.000385	0.002612	-2.76361	0.026002	81.3863	1
C_NC	PF01086	Pfam	Clathrin light chain	6	2600	11	11023	0.002308	0.000594	1.95886	0.026015	81.4277	1
C_NC	PIRSF037932	PIRSF	RNA binding protein Fox-1	6	2600	11	11023	0.002308	0.000594	1.95886	0.026015	81.4277	1
C_NC	PR01251	Prints	Amphiphysin	6	2600	11	11023	0.002308	0.000594	1.95886	0.026015	81.4277	1
C_NC	PR00359	Prints	Cytochrome P450, B-class	2	2600	29	11023	0.000769	0.003206	-2.05906	0.029313	91.7488	1
C_NC	PF01216	Pfam	Calsequestrin	0	2600	15	11023	0	0.001781	-inf	0.029687	92.9203	1
C_NC	PF01731	Pfam	Arylesterase	0	2600	15	11023	0	0.001781	-inf	0.029687	92.9203	1
C_NC	PR01786	Prints	Paraoxonase1	0	2600	15	11023	0	0.001781	-inf	0.029687	92.9203	1
C_NC	SM00316	Smart	RNA-binding domain, S1	0	2600	15	11023	0	0.001781	-inf	0.029687	92.9203	1
C_NC	PF00433	Pfam	Protein kinase, C-terminal	4	2600	6	11023	0.001538	0.000237	2.69582	0.030591	95.7493	1
C_NC	PF09731	Pfam	Mitochondrial inner membrane protein Mitofilin	4	2600	6	11023	0.001538	0.000237	2.69582	0.030591	95.7493	1
C_NC	PR00193	Prints	Myosin head, motor domain	4	2600	6	11023	0.001538	0.000237	2.69582	0.030591	95.7493	1
C_NC	PR01802	Prints	Synembryn	4	2600	6	11023	0.001538	0.000237	2.69582	0.030591	95.7493	1
C_NC	SM00109	Smart	Protein kinase C-like, phorbol ester/diacylglycerol-binding domain	4	2600	6	11023	0.001538	0.000237	2.69582	0.030591	95.7493	1
C_NC	PR00449	Prints	Small GTPase superfamily	15	2600	103	11023	0.005769	0.010448	-0.856718	0.034965	109.44	1
C_NC	PR00391	Prints	Phosphatidylinositol transfer protein	5	2600	9	11023	0.001923	0.000475	2.01775	0.038674	121.05	1
C_NC	PR01185	Prints	Integrin alpha chain	5	2600	9	11023	0.001923	0.000475	2.01775	0.038674	121.05	1
C_NC	SM00721	Smart	BAR domain	5	2600	9	11023	0.001923	0.000475	2.01775	0.038674	121.05	1
C_NC	SM00093	Smart	Serpin domain	1	2600	22	11023	0.000385	0.002493	-2.6965	0.040699	127.388	1
C_NC	SSF56574	Superfamily	Serpin domain	1	2600	22	11023	0.000385	0.002493	-2.6965	0.040699	127.388	1
C_NC	PF00804	Pfam	Syntaxin, N-terminal domain	3	2600	4	11023	0.001154	0.000119	3.28078	0.043175	135.137	1
C_NC	PF01242	Pfam	6-pyruvoyl tetrahydropterin synthase/QueD family protein	3	2600	4	11023	0.001154	0.000119	3.28078	0.043175	135.137	1
C_NC	PF07763	Pfam	Fasciculation and elongation protein zeta, FEZ	3	2600	4	11023	0.001154	0.000119	3.28078	0.043175	135.137	1
C_NC	PIRSF037201	PIRSF	Ubiquitin-protein ligase E6-AP	3	2600	4	11023	0.001154	0.000119	3.28078	0.043175	135.137	1
C_NC	SM00185	Smart	Armadillo	3	2600	4	11023	0.001154	0.000119	3.28078	0.043175	135.137	1
C_NC	SM00503	Smart	Syntaxin, N-terminal domain	3	2600	4	11023	0.001154	0.000119	3.28078	0.043175	135.137	1
C_NC	SSF49348	Superfamily	Coatomer/clathrin adaptor appendage, Ig-like subdomain	3	2600	4	11023	0.001154	0.000119	3.28078	0.043175	135.137	1
C_NC	SSF57184	Superfamily	Insulin-like growth factor binding protein, N-terminal	3	2600	4	11023	0.001154	0.000119	3.28078	0.043175	135.137	1
C_NC	TIGR00039	TIGRfam	6-pyruvoyl tetrahydropterin synthase/QueD family protein	3	2600	4	11023	0.001154	0.000119	3.28078	0.043175	135.137	1
C_NC	SSF53448	Superfamily	Nucleotide-diphospho-sugar transferases	3	2600	35	11023	0.001154	0.003799	-1.71921	0.043567	136.363	1
C_NC	PF00270	Pfam	DEAD/DEAH box helicase domain	0	2600	13	11023	0	0.001543	-inf	0.047868	149.826	1
C_NC	PF01920	Pfam	Prefoldin beta-like	0	2600	13	11023	0	0.001543	-inf	0.047868	149.826	1
C_NC	PF03006	Pfam	Hly-III-related	0	2600	13	11023	0	0.001543	-inf	0.047868	149.826	1
C_NC	PS51192	Prosite_profiles	Helicase, superfamily 1/2, ATP-binding domain	0	2600	13	11023	0	0.001543	-inf	0.047868	149.826	1
C_NC	SM00487	Smart	Helicase, superfamily 1/2, ATP-binding domain	0	2600	13	11023	0	0.001543	-inf	0.047868	149.826	1
C_NC	SSF49313	Superfamily	Cadherin-like	0	2600	13	11023	0	0.001543	-inf	0.047868	149.826	1
C_NC	SSF56784	Superfamily	HAD-like domain	0	2600	13	11023	0	0.001543	-inf	0.047868	149.826	1
C_NC	SM00456	Smart	WW domain	8	2600	18	11023	0.003077	0.001187	1.37389	0.049381	154.563	1
C_NC	SSF54495	Superfamily	Ubiquitin-conjugating enzyme/RWD-like	12	2600	30	11023	0.004615	0.002137	1.11086	0.049465	154.826	1
