# Supplementary material for: A new view of transcriptome complexity and regulation through the lens of local splicing variations
Source: eLife. 2016 Feb 1;5:e11752. doi: 10.7554/eLife.11752 (PMC4801060; doi:10.7554/eLife.11752)
Supplement: Supplementary file 2. — DOI: http://dx.doi.org/10.7554/eLife.11752.026 [file elife-11752-supp2.xlsx]

## Sheet: Sheet1
LSV_ID	event	forward_primer	reverse_primer	expected_product_sizes	mm10_PCR_bounds
ENSMUSG00000026131:34299721-34299838:source	Dst_72	GCACAGTGATGGTTCGTGTTGGAGG	TCCTCTGGATGAAGGGCGAGATCG	263/191	chr1:34,299,764-34,302,945
ENSMUSG00000004558:51911466-51911546:target	Ndrg2_42	CCACCATGGCAGAACTTCAGGAGG	AGGTGAATATCGCCGGGCGTTTGG	207/165	chr14:51,910,701-51,911,545
ENSMUSG00000005417:59771617-59771702:source	Mprip_66	TACCCGGCAACTCAGAAACATCAGG	CAGCTGGGAAGGATGTGTCAGTGG	204/138	chr11:59,771,672-59,775,622
ENSMUSG00000024381:32414183-32414290:source	Bin1_93	AGCTGGTGGACTATGACAGTGCCC	CGCGATGCTCTGGAACGTGTTGAC	302/209	chr18:32,414,208-32,420,108
ENSMUSG00000028745:139287756-139287832:source	Capzb_113	GGAAAACAAAATCCGAAGCACGCTG	CCTCCACCAGGTCGTTCTTAAGCG	247/134	chr4:139,287,761-139,291,064
ENSMUSG00000020792:116292519-116292584:source	Exoc7_40	GCCATCCTGTTCCTACAGCAGCTTCTGG	AGATGTAGGTGCTCAGCAGCCGCTTGC	172/133	chr11:116,292,519-116,294,038
ENSMUSG00000026819:32421303-32421390:target	Slc25a25_36	TCGATGCTCAGGAGATCATGCAGTCCC	GAGTGCTTCCAGTACAGGATGATCTCC	226/190	chr2:32,420,309-32,421,384
ENSMUSG00000071454:3734939-3735026:target	Dtnb_90	GCCCTCTGACCAATATGAATGACACCG	CATGTTTCCTGCCTCTGCAGCTAGC	248/158	chr12:3,718,420-3,735,026
ENSMUSG00000040687:91138709-91139256:source	Madd_70	GTTCCCTGTGCAGGACATGAAGACTGG	ATTGGCGTCTTGTACTTGTGGCTCACC	204/134	chr2:91,138,710-91,142,843
ENSMUSG00000027642:157321743-157322471:source	Rpn2_48	CAGACCCTCAAGTACCTGGCTGTCC	CCTCCTGTTGTGTCCCCAGTTCTTCC	246/198	chr2:157,321,790-157,325,825
ENSMUSG00000060450:38307865-38308395:target	Rnf14_152	CAATGTCGGCAGAAGACCTGGAAGCC	GAGACCCCATCTTGAGCTCAAAAGG	453/301	chr18:38,300,435-38,308,009
ENSMUSG00000037519:144500252-144500562:source	Ppfia1_30	AAGAAGGGTCCCTCACAGTCCTGCC	CCTCAGGTCCCTGATGTCCTCATGG	238/208	chr7:144,500,254-144,504,960
ENSMUSG00000024830:4161064-4161215:target'	Rps6kb2_140	GCCAAGATTGTATGCAGTGCCAAGG	CAGGCTGTGTCTTCCAGGAAGATGC	346/206	chr19:4,159,403-4,161,215
ENSMUSG00000036644:50163825-50164095:source	Tbc1d9b_51	TCTGATCCCAGAGGAAGCCGAGTCAGC	CTTCTTTCTGGGGTGTCCTCATTTCC	196/124	chr11:50,163,826-50,168,223
ENSMUSG00000021669:96616457-96616549:source	Col4a3bp_78	GTGAAAAGGTCAGGTTACACTGGCC	ACCAGTTGCCAATTTGCATCACCACC	238/160	chr13:96,616,464-96,624,768
ENSMUSG00000035629:32838238-32838594:source	1700021K19Rik_42	CTTCGCAGGTCCAGCTTCTCAGAAGG	CTTTTCCAGGTCTGCACAGCTGCC	273/228	chr16:32,838,238-32,843,109
ENSMUSG00000041852:82815611-82815660:target	Tcf20_123	GCATGAGGAGAATTTCTCGGTGAGG	GGAGATTGTGTCCATGGAAACAGCC	392/269	chr15:82,809,559-82,815,650
ENSMUSG00000031996:31153414-31153501:source	Aplp2_36	TGAGCTCCTTCAGGAACAGCGAGC	CCGTCTTGTTCTGCCATTCCAGAGC	219/177	chr9:31,153,475-31,157,846
ENSMUSG00000059439:85531793-85531943:source	Bcas3_45	ACAAACAACAACCCTGGCAATCCCC	CTGGAAGTCCCAAACACTGCAGCC	245/200	chr11:85,531,828-85,554,273
ENSMUSG00000029722:137661364-137661762:target	Agfg2_33	AGACTCCTGCCCATGGAGGCTTTGC	GCCCACATCTGCAAGGTTGTTGGG	233/200	chr5:137,655,652-137,661,486
ENSMUSG00000029528:115546813-115549756:source	Pxn_102	CACTGTGAACCAGGGAGAGATGAGC	CCTAGCTTGTTCAGGTCGGACTGC	342/240	chr5:115,546,822-115,551,963
ENSMUSG00000022791:32681152-32681279:target	Tnk2_96	CCACCAATAACAGCAACCCAGGGG	TTGTGATGAGCAGGGCCACAGGAGC	346/250	chr16:32,680,686-32,681,279
ENSMUSG00000031153:7803323-7803400:source	Gripap1_93	AGAGCTAAGAGATCAGCGGCAGGG	GCGAGTTGAGGTCATCTTTCTGTCCC	290/197	chrX:7,803,331-7,804,486
ENSMUSG00000020827:70608840-70608958:target	Mink1_111	CCACAGAGGACCTCTTCTATCGCC	ACACGGTTTCGGTTCCGCTCCAAGG	308/197	chr11:70,608,344-70,608,953
ENSMUSG00000042772:152841513-152841593:source	Smg7_150	GTCAAGGTCCCAGAGTTCTACTGGG	GATTGACAGAGAACCCCGTGAGGG	383/233	chr1:152,841,515-152,844,188
ENSMUSG00000000708:53665653-53665716:target	Kat2b_37	CAAGCCCAGATTCGAAAAGTCTACCC	CCTGCTGCAGGATGTTCTTGAGGG	184/147	chr17:53,663,562-53,665,711
ENSMUSG00000036167:93441501-93441712:source	Pphln1_57	CGCTCCCTTCTTCAGAGAATCCCC	TTGAGGGTGACGCATCTCTCGAGG	245/188	chr15:93,441,579-93,455,504
ENSMUSG00000027194:94355049-94358937:target	Tct17_171	TACCCGTTCCTGTACAACGCCACC	ATTCCCTGTAGGTCCAGACGTCGC	380/209	chr2:94,332,884-94,358,790
ENSMUSG00000041757:133287470-133287599:target	Plekha6_150	TCAGCCACCTACAGCTCCAACAGC	TTGAGAGCTGCCTGCTTCTCTGCC	401/251	chr1:133,285,261-133,287,594
ENSMUSG00000026131:34302830-34303032:source	Dst_111	ATCTCGCCCTTCATCCAGAGGAGC	CAGCGAACTGTGTTCGGACTCTGG	344/233	chr1:34,302,924-34,306,651
ENSMUSG00000040712:70670549-70670736:source	Camta2_21	CAGCGGTGATCCAACGTTGTTATCG	GAGCGGTAGTGCTGCTGGATAAGC	187/166	chr11:70,670,609-70,671,045
ENSMUSG00000025369:128480851-128481004:source	Smarcc2_93	GTCCATGCCTTCCTGGAACAGTGG	TGTGTACATGTCTGTGCGCAGCCC	345/252	chr10:128,480,852-128,482,181
ENSMUSG00000021709:103833498-103835028:target	Erbb2ip_144	ATACATCCAGGCCTCAGAGTGCCC	AGTGCACCTGATGGGTGGTTCTGC	448/304	chr13:103,827,941-103,833,718
ENSMUSG00000071454:3751811-3751907:source	Dtnb_21	AGCTGGAGGGGCTGATGAAGTTGC	TGCAAAGGCCTCCTGGACATCTCC	206/185	chr12:3,751,879-3,772,742
ENSMUSG00000045103:85190610-85190702:source	Dmd_32	TGAGGAAGATCTTCTGAGTCCTCCC	GAAACTAAGGACTCCATCGCTCTGC	191/159	chrX:85,190,611-85,202,537
ENSMUSG00000001419:88161191-88161381:source	Mef2d_21	CTGATCTGCGGGTCATCACTTCCC	TGTTGTAGGCAGTGGGCATGGAGG	201/180	chr3:88,161,329-88,163,084
ENSMUSG00000037608:20339709-20339921:target	Bclaf1_147	AAAGGTAGAGAGCGGGACCATTCCC	CCACGACCTCTTCCTCTTTTGGCC	377/230	chr10:20,333,399-20,339,764
ENSMUSG00000022568:76050050-76050112:target	Scrib_84	AAGACGACTGAGGCTCCCTGTTCC	CTGGGTAGCACTGTTCTCAGGAGG	222/138	chr15:76,049,203-76,050,088
ENSMUSG00000021224:83799508-83799657:target	Numb_147	CAGATCACCAGTGCCTTCAGCACG	CTAACCAGCGGTCAGCTTCAGAGG	343/196	chr12:83,796,062-83,799,610
ENSMUSG00000004591:142820537-142820646:target	Pnk2_144	TCGTGGGACCAGAAGTTTACACTGG	GTCAACGACTGGCACTGTTGCAGG	399/255	chr3:142,810,723-142,820,572
ENSMUSG00000034602:123009503-123009631:source	Mon2_18	GGACAGCTGGAAACAAAGCACATTGC	GGAGGACTTTCTCATTCACCACTGC	178/160	chr10:123,009,517-123,010,538
ENSMUSG00000066036:139431545-139431761:source	Ubr4_33	CTCAGTCAGCAACATCTGCCCTCC	GCAAAGCAGCTTTCCAGGGCTTCC	177/144	chr4:139,431,660-139,433,661
ENSMUSG00000036986:58229828-58230127:source	Pml_138	AGCACTCACCCAGTGACAACCAGC	TTTTCAGGGACGGTGCTCTCAGGG	389/251	chr9:58,229,881-58,233,197
ENSMUSG00000041268:54380908-54381025:target	Dmxl2_63	GCACTTCCTGTCAAGCGACTCTGG	AATGACCTTCGCCTTCCCTCCTGG	210/147	chr9:54,378,959-54,381,009
ENSMUSG00000033060:101932570-101933137:target	Lmo7_109	TCCTCTGTCCAGGACTTCAGTCGC	GACTTCAGCTCCTGAGGAAGAGCC	345/236	chr14:101,929,267-101,932,620
ENSMUSG00000000826:181548670-181548841:source	Dnajc5_75	CTGCTGCTGTGGGAAATGCAAGCC	TGAACCCGTCGGTGTGATAGCTGG	278/203	chr2:181,548,738-181,549,371
ENSMUSG00000031422:136739805-136740487:target	Morf4l2_77	CCCTGGTTGCAGAACCATTCCTGG	TGACTTCTTTCCCGAGGCAGCTCC	268/191	chrX:136,734,349-136,739,842
ENSMUSG00000022533:30322872-30322952:target	Atp13a3_90	AATGCCTTCGTGTCTATCACGGTGG	CCGTCGTTGTCTGAGGTTTAGGCG	259/169	chr16:30,315,760-30,322,898
ENSMUSG00000039449:4645569-4645673:source	Ptpf18_27	ATACTTCAAGCGGAGTGAACTGGCG	CTGCTAGTTCAAGTTCCAGCACTGG	167/134	chr2:4,645,604-4,648,307
ENSMUSG00000034101:84612024-84612092:source	Ctnnd1_18	TCGTGAAATCCCACAGGCAGAGCG	GCTGGATCCTCTGTAGGCTTTTTCC	149/131	chr2:84,612,068-84,613,039
ENSMUSG00000006498:79860824-79860969:target	Ptbp1_e12-15	ACTAGACCAGACCATGGCAGCAGC	CAGAATTCCCAGCACCTGCCAACC	280/224/202/146	chr10:79,859,927-79,860,940
n/a	Ptbp1_e12-14	CGCATCGACTTCTCCAAGCTCACC	TCTACTAGGGACACTGCGTCCTCG	250/172	chr10:79859823-79860485
n/a	Ptbp1_e14-17	ACGAGGACGCAGTGTCCCTAGTAG	GATCTTCACCCGCTGCACATCACC	254/220	chr10:79,860,461-79,862,480
ENSMUSG00000006498:79860824-79860969:source	Ptbp1_e15-17	GCCTCTCTGTCCCTAATGTCCATGG	GATCTTCACCCGCTGCACATCACC	212/178	chr10:79,860,824-79,862,480
ENSMUSG00000028760:138087533-138087565:source	Eif4g3_e10-14	GGCCTCGACCTGCCCATCATCAG	ATGCAGTACTGATGCCCCTGGGTCACG	316/196	chr4:138,087,543-138,096,924
ENSMUSG00000028760:138082893-138082988:source	Eif4g3_e8-14	AGCCACATTGGTCTATCCTCAAGCC	AGGACTGCTGTTTGGGATGGCAGC	235/175/154/142/121	chr4:138,082,925-138,096,808
ENSMUSG00000053819:126801717-126801761:source	Camk2d_e18-22	CCAAGAGTTTATTGAAGAAACCAGATGGG	GCCTCAAAGTCCCCATTGTTGATAGC	256/214/187/154	chr3:126,801,727-126,834,643
ENSMUSG00000028478:44032401-44032846:target	Clta_e5-8	AAGAGTGGTATGCGAGGCAGGACG	CTTCAGGGAGATGAGGACTGAGCG	296/260/242/206	chr4:44,025,506-44,032,551
ENSMUSG00000021820:20755659-20755702:target	Camk2g_e13-17	CCTATTGAACAAGAAGTCAGATGGCG	GTAGTGGTGTTACAGCTCTCTGTGG	210/177/141/108	chr14:20,742,725-20,755,692
ENSMUSG00000021288:111789322-111789486:source	Klc1_e13-17	CGGGAGAGTCTCAATATGGACGTGG	R1: CCAGAAATCAAGAACCCAAAAGGACGGC	315/289/264/250/238/224/119/93	chr12:111,789,400-111,794,514
			R2: TTTTCCACACAAAGAGGCTCTGCGG		chr12:111,789,400-111,806,040

## Sheet: Sheet2
#Event	Expected_products	forward_primer	reverse_primer	mm10_PCR_bounds
Ptbp1_e12-15	ACTAGACCAGACCATGGCAGCAGC	CAGAATTCCCAGCACCTGCCAACC	280/224/202/146	chr10:79,859,927-79,860,940		e13+14/e13/e14/all_exc
Ptbp1_e12-14	CGCATCGACTTCTCCAAGCTCACC	TCTACTAGGGACACTGCGTCCTCG	250/172	chr10:79859823-79860485		e13+14/e14_alone
Ptbp1_e14-17	ACGAGGACGCAGTGTCCCTAGTAG	GATCTTCACCCGCTGCACATCACC	254/220	chr10:79,860,461-79,862,480		e16 inc/exc linked to e14 inclusion [e16 inc/exc with retention of i14]
Ptbp1_e15-17	GCCTCTCTGTCCCTAATGTCCATGG	GATCTTCACCCGCTGCACATCACC	212/178	chr10:79,860,824-79,862,480
Eif4g3_e10-14	GGCCTCGACCTGCCCATCATCAG	ATGCAGTACTGATGCCCCTGGGTCACG	316/196	chr4:138,087,543-138,096,924
Eif4g3_e8-14	AGCCACATTGGTCTATCCTCAAGCC	AGGACTGCTGTTTGGGATGGCAGC	235/175/154/142/121	chr4:138,082,925-138,096,808		e8,e9+12,e9,e12,allExc ***need junc primers becase e10+e11 (not seen by RNA-seq) would ALSO be at 142
Camk2d_e18-22	CCAAGAGTTTATTGAAGAAACCAGATGGG	GCCTCAAAGTCCCCATTGTTGATAGC	256/214/187/154	chr3:126,801,727-126,834,643		e20+21;e20;e21;e19;AllExc
Rapgef1_e12-15	TCATGGAGGTGTACGGCTTCAGCG	ATGTCCGTCCTTCCCAGATGGTGG	635/539/287/125	chr2:29,707,303-29,722,250		e12+13+14; e12+13; e12; AllExc
Clta_e5-8	AAGAGTGGTATGCGAGGCAGGACG	CTTCAGGGAGATGAGGACTGAGCG	296/260/242/206	chr4:44,025,506-44,032,551		e6+7;e7; e6; AllExc
Camk2g_e13-17	CCTATTGAACAAGAAGTCAGATGGCG	GTAGTGGTGTTACAGCTCTCTGTGG	210/177/141/108	chr14:20,742,725-20,755,692		e14+15; e15; e14*;all exc
Klc1_e13-17	CGGGAGAGTCTCAATATGGACGTGG	R1: CCAGAAATCAAGAACCCAAAAGGACGGC	315/289/264/250/238/224/119/93	chr12:111,789,400-111,794,514		13L+14*; 13S+14; 13L-15; 13S-15; 13L-16; 13S-15; 13S-16*; 13L-17*; 13S-17
		R2: TTTTCCACACAAAGAGGCTCTGCGG		chr12:111,789,400-111,806,040
