# Supplementary figures and images for: A new view of transcriptome complexity and regulation through the lens of local splicing variations
Source: eLife journal article supplement (doi:10.7554/elife.11752), 2016-02-01

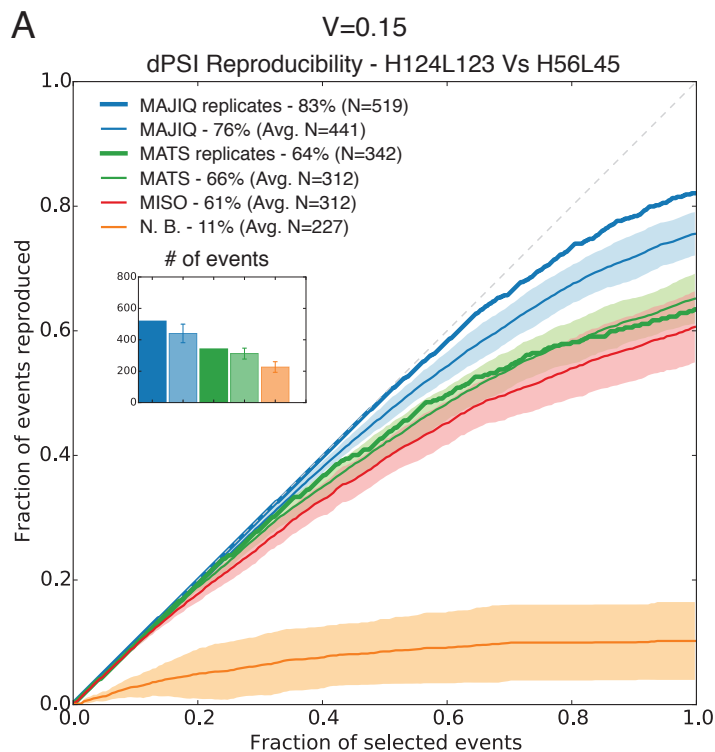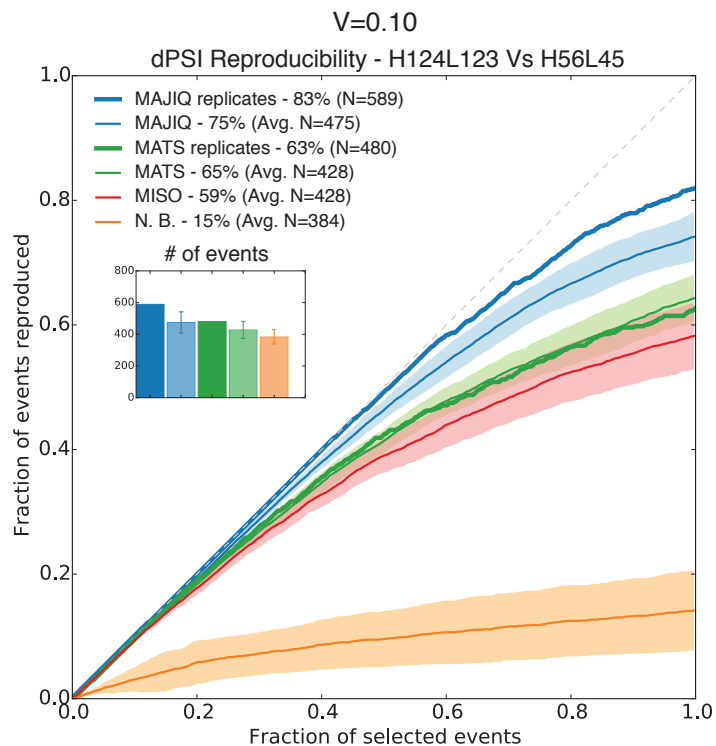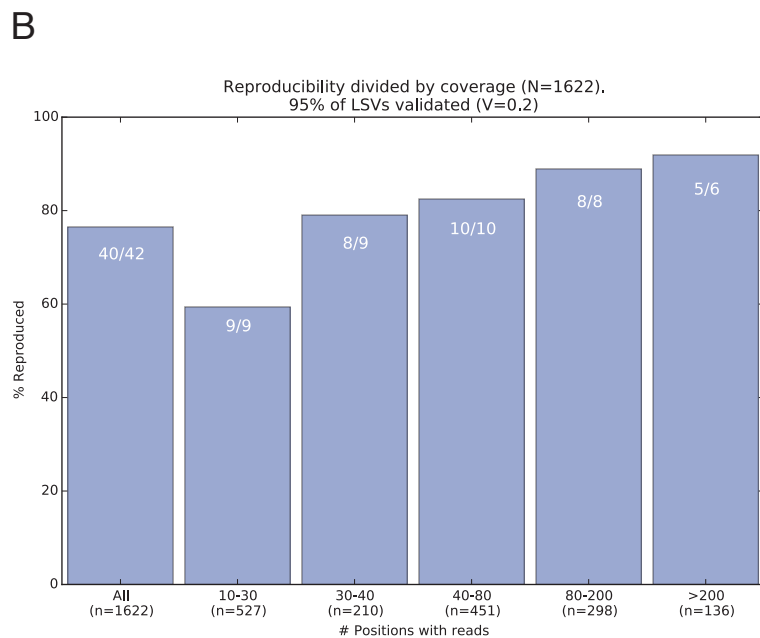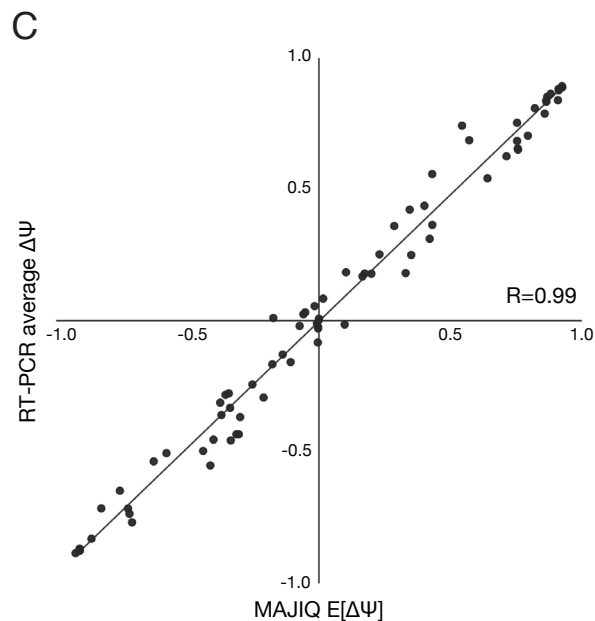

Supplement: supp [file elife-11752-supp-v1.zip]

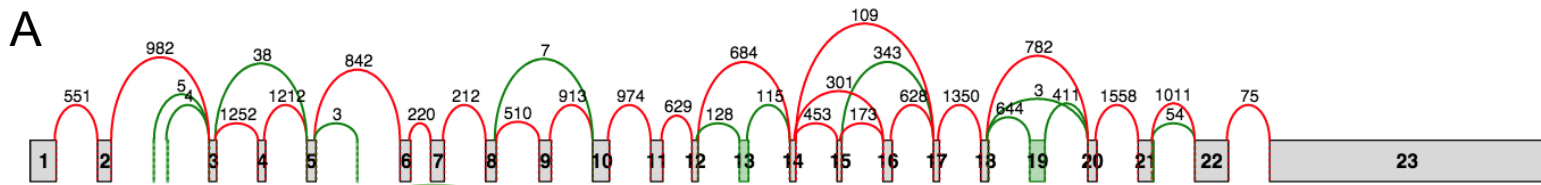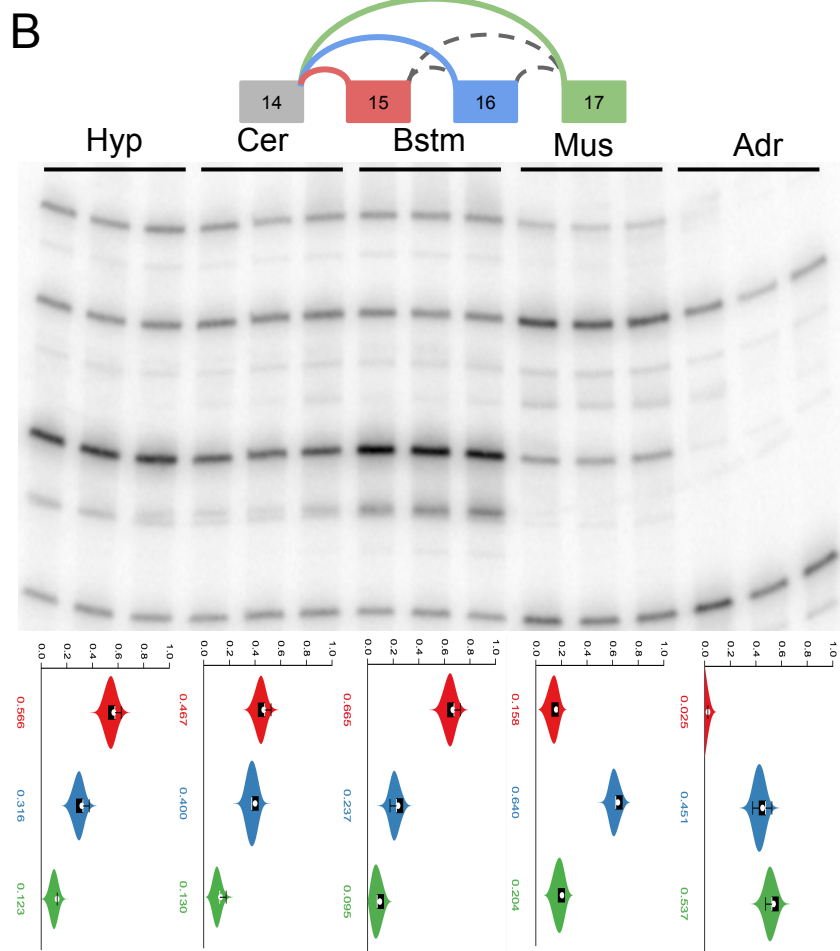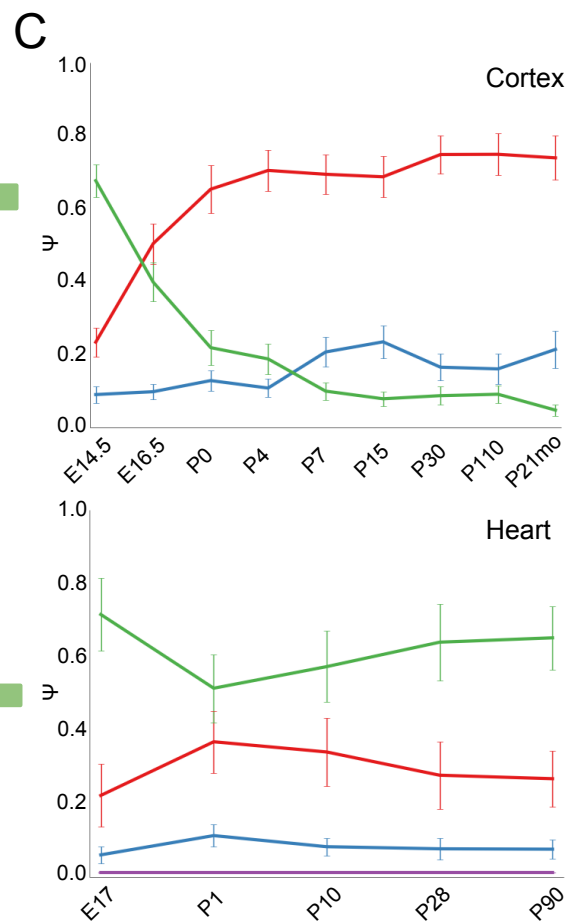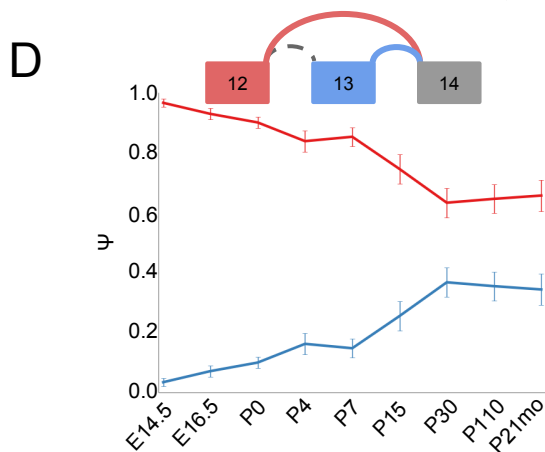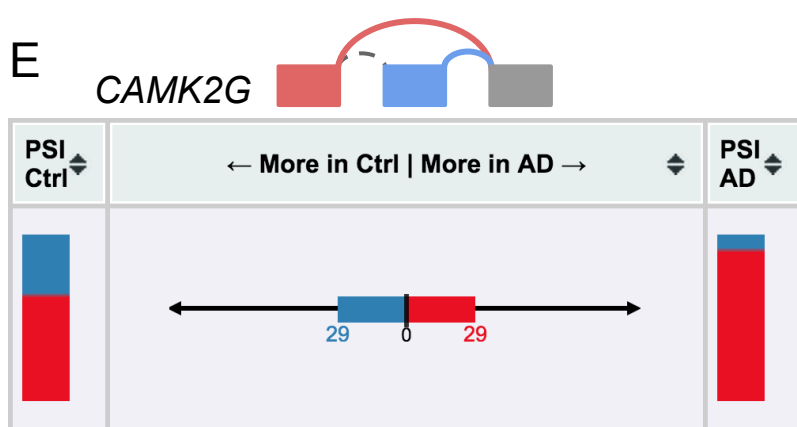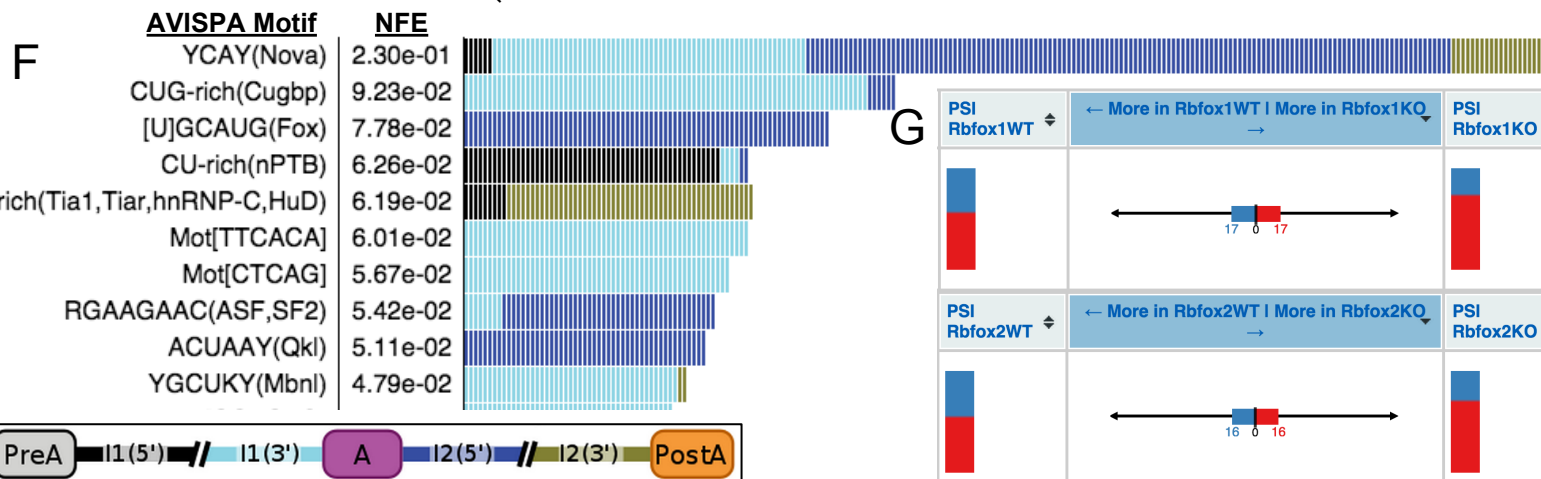

Supplement: supp [file elife-11752-supp-v1.zip]

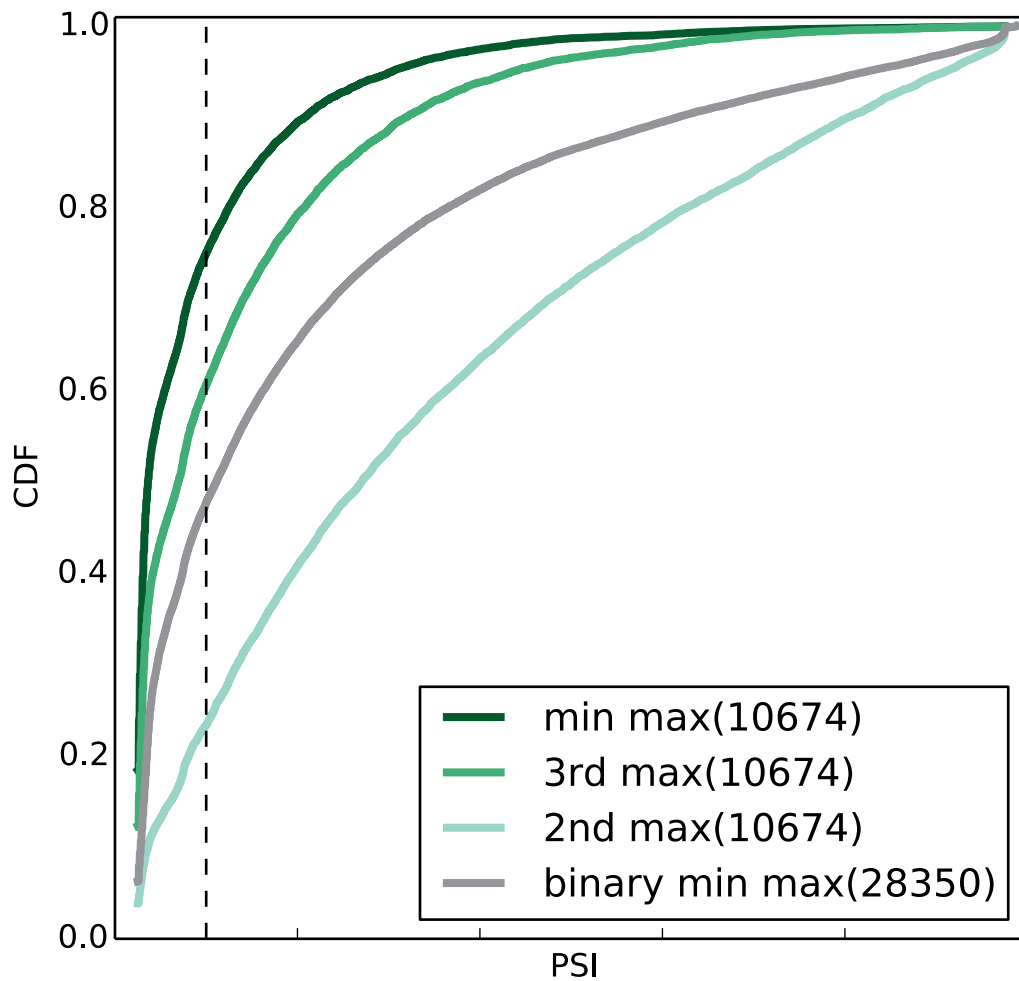

Supplement: supp [file elife-11752-supp-v1.zip]

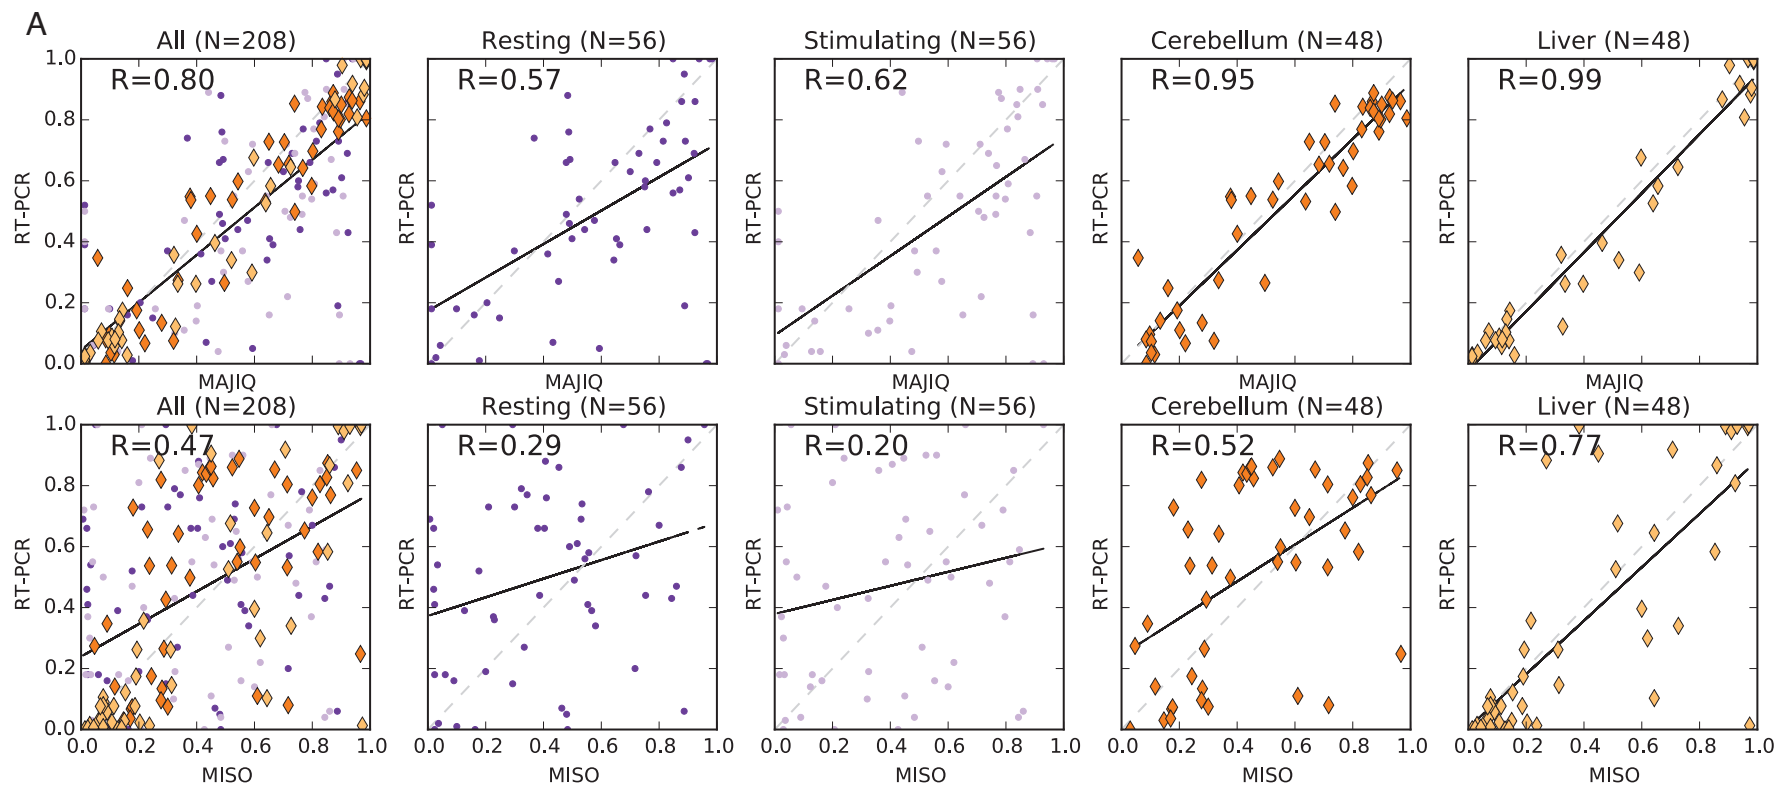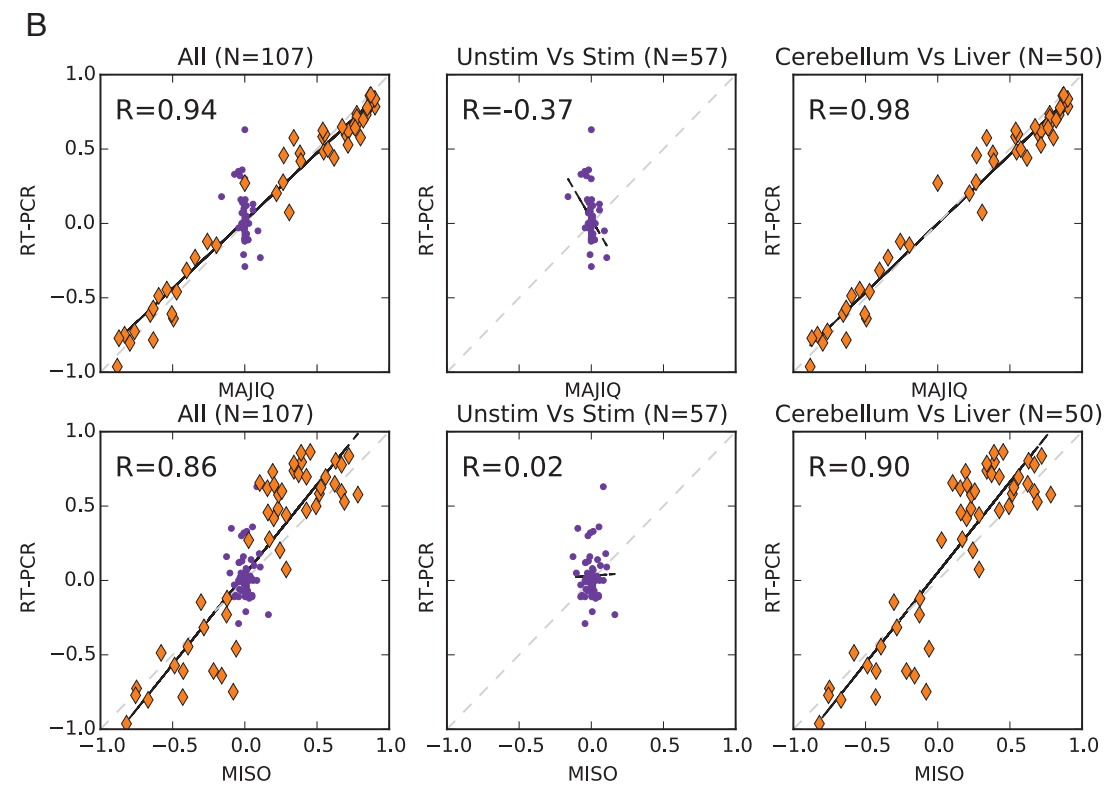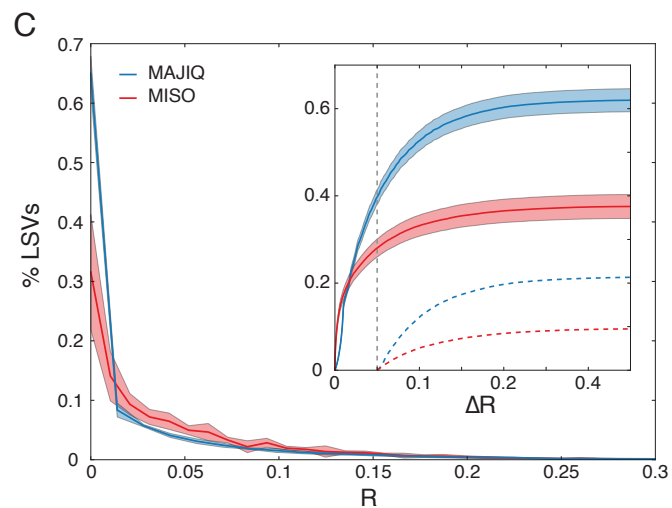

Supplement: supp [file elife-11752-supp-v1.zip]

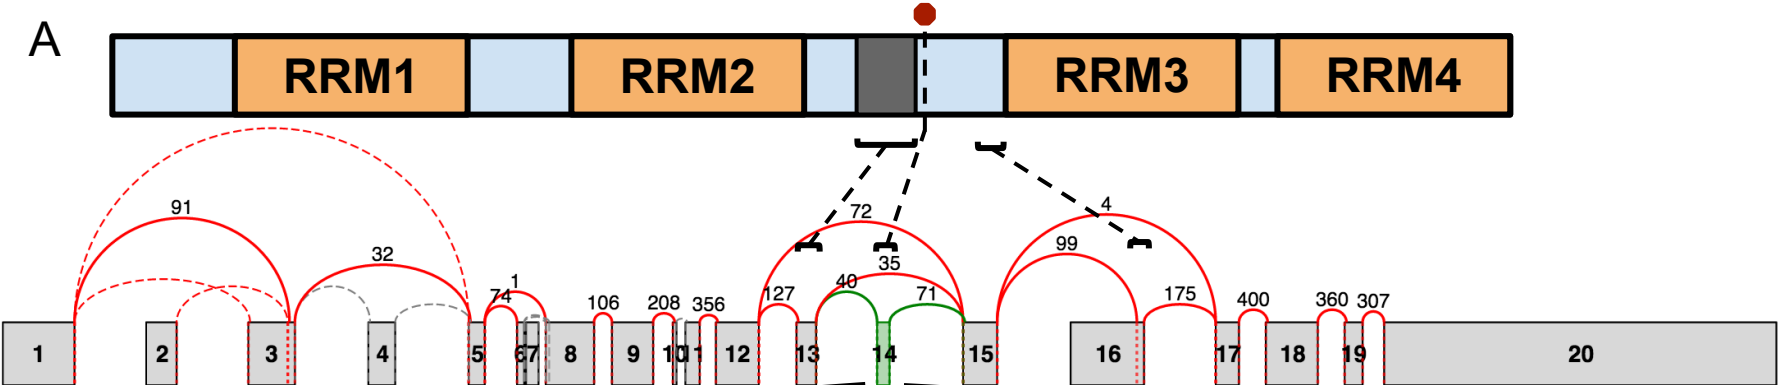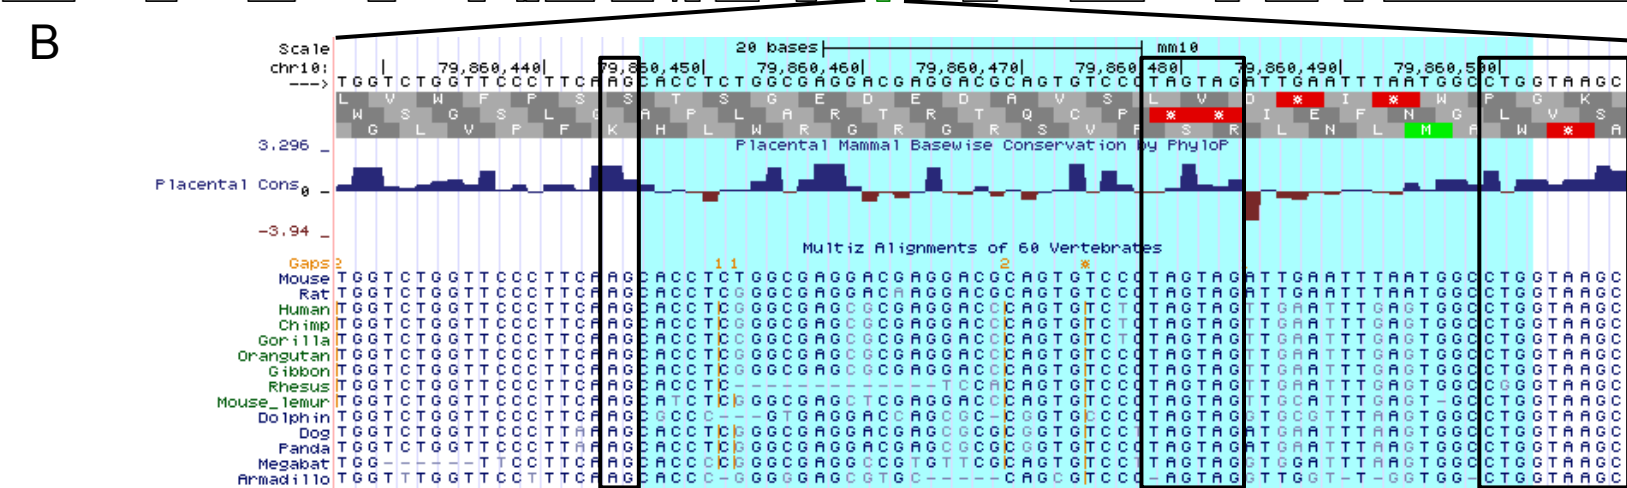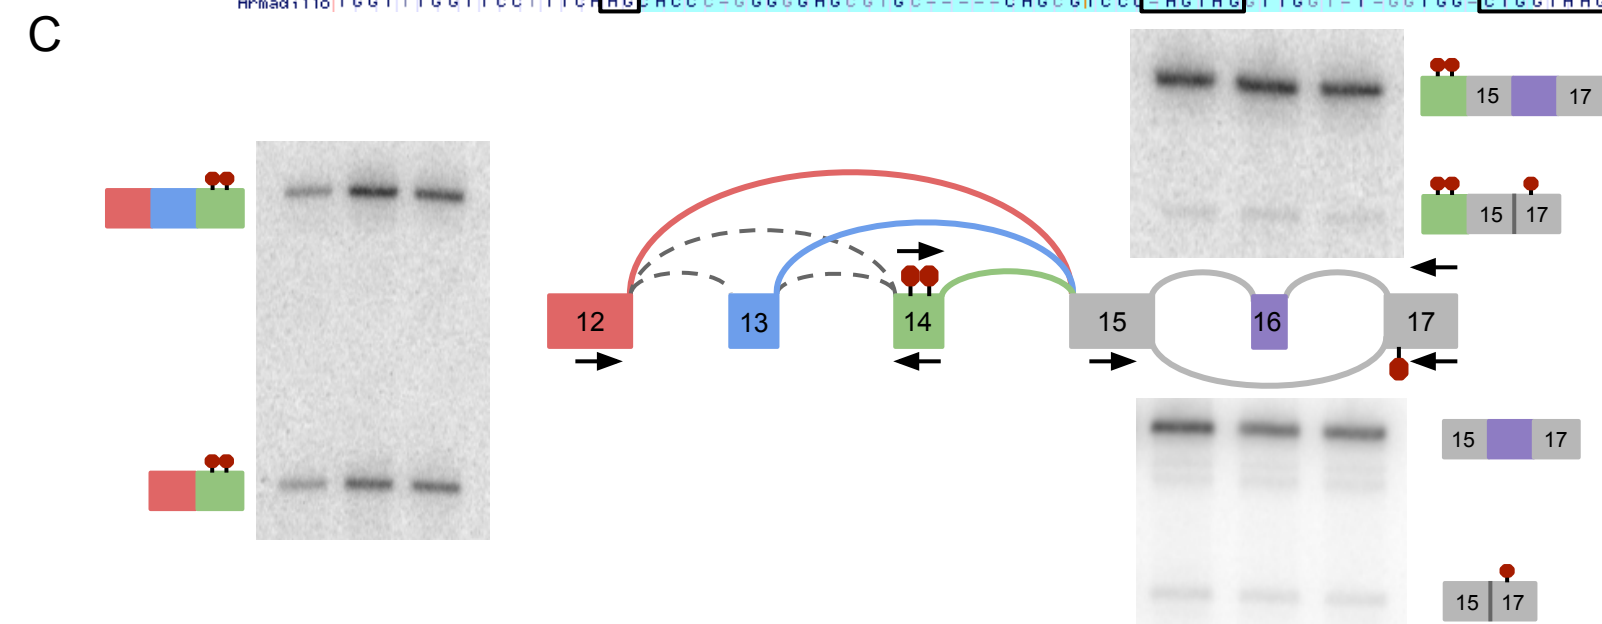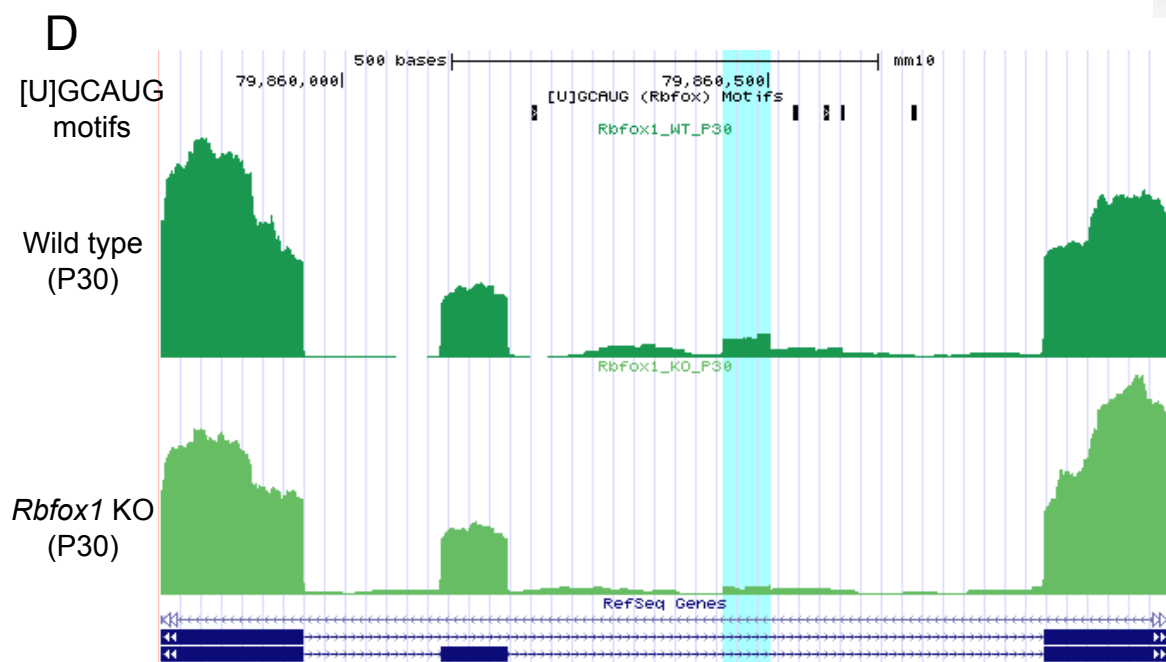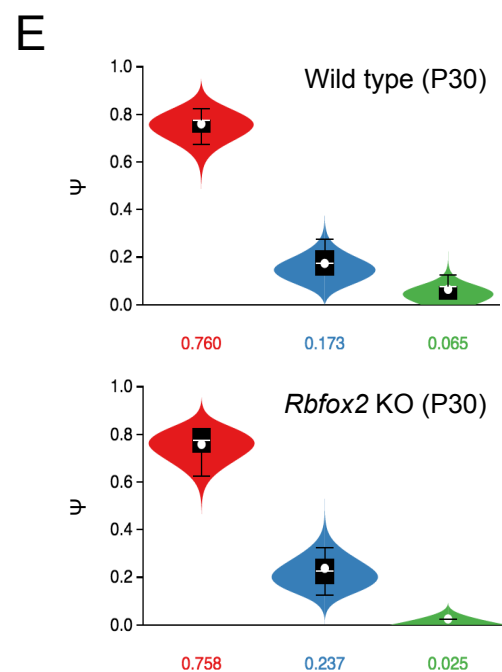

Supplement: supp [file elife-11752-supp-v1.zip]

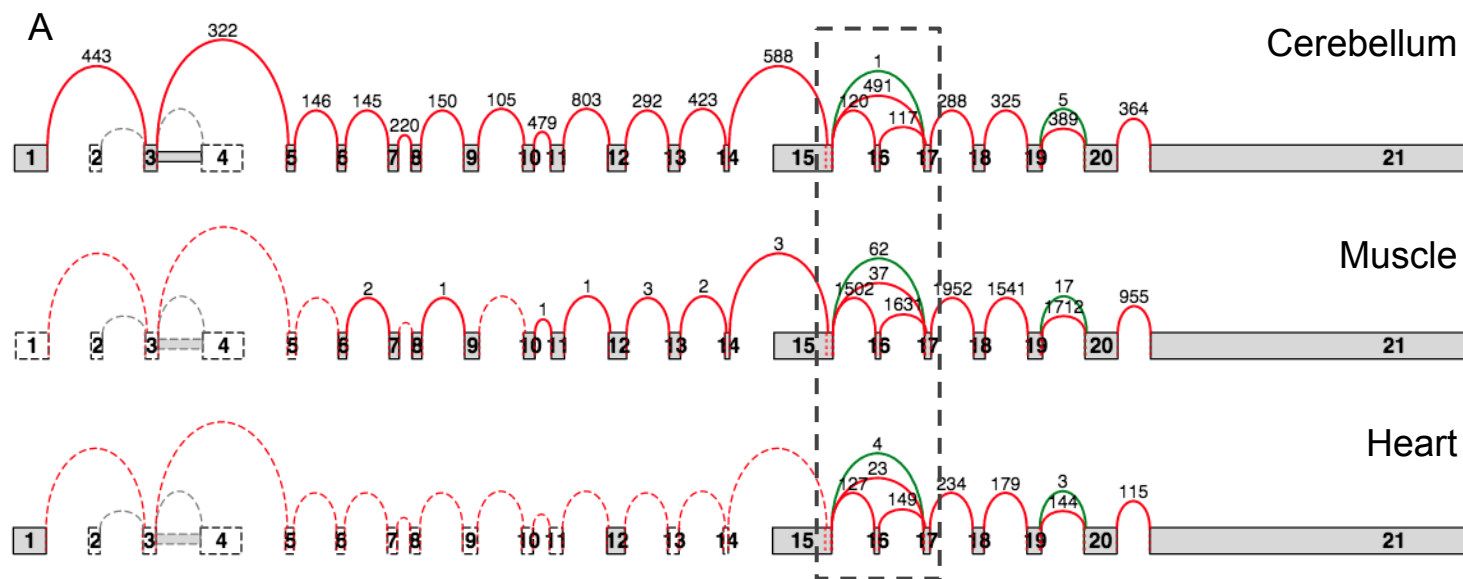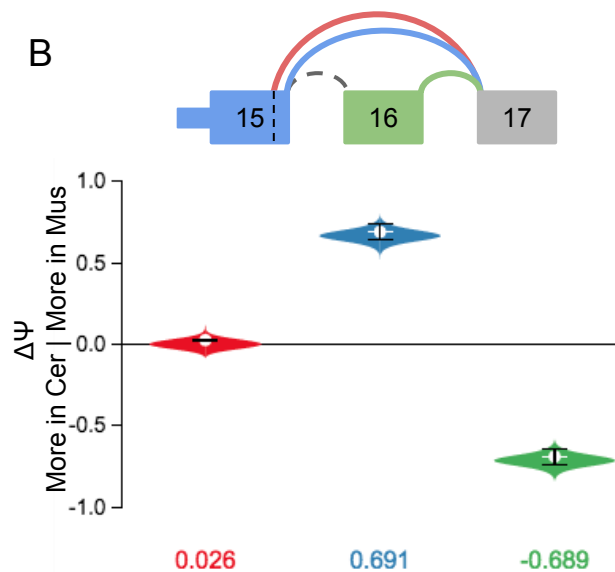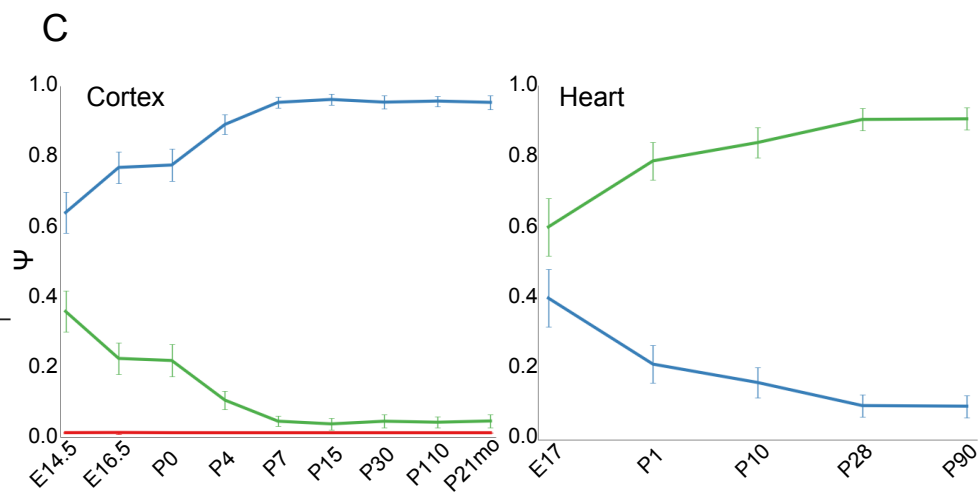

Supplement: supp [file elife-11752-supp-v1.zip]

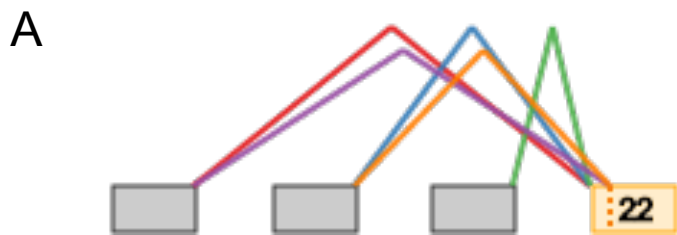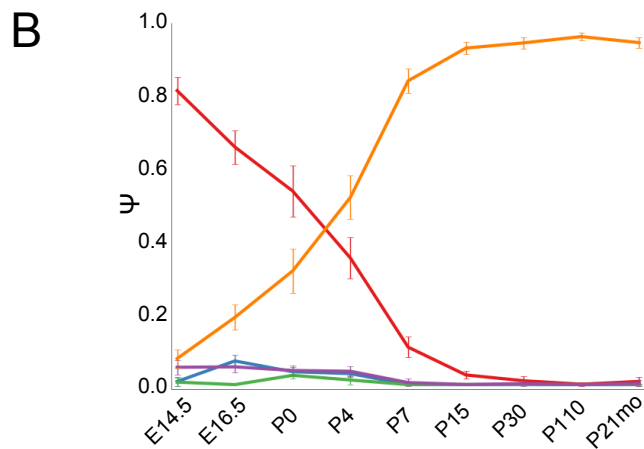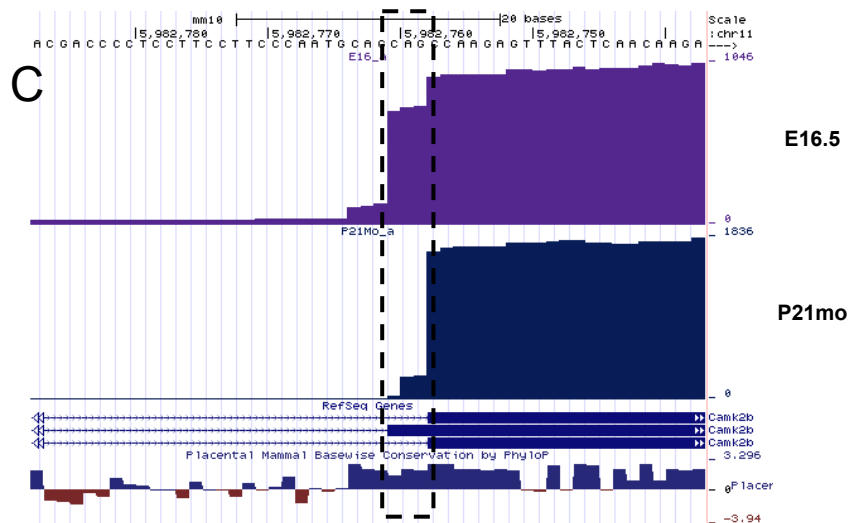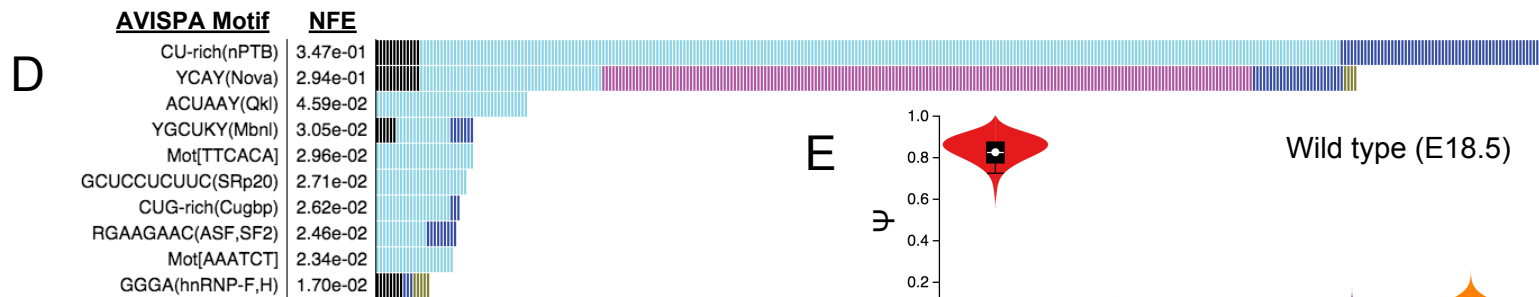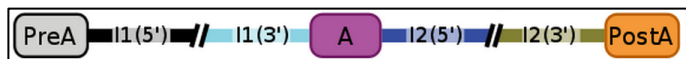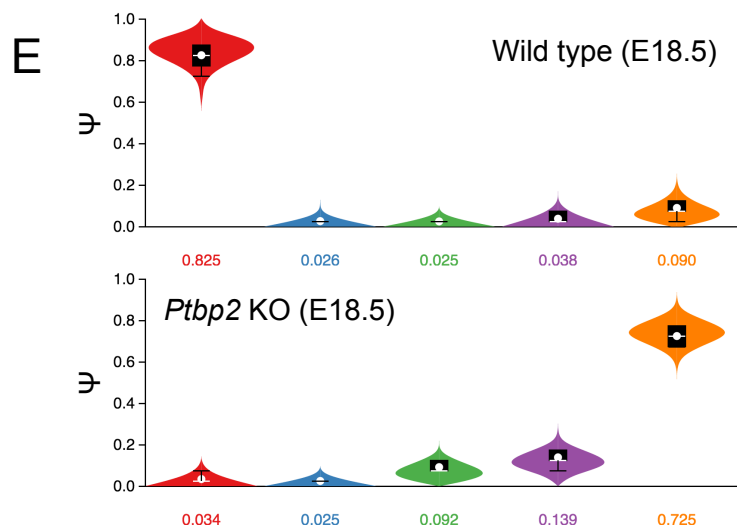

Supplement: supp [file elife-11752-supp-v1.zip]

A

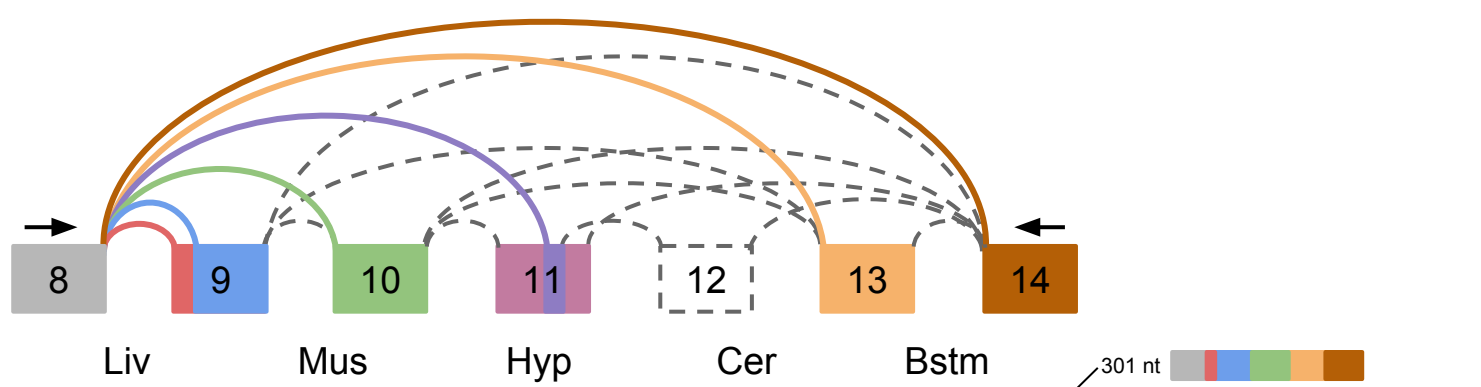

B

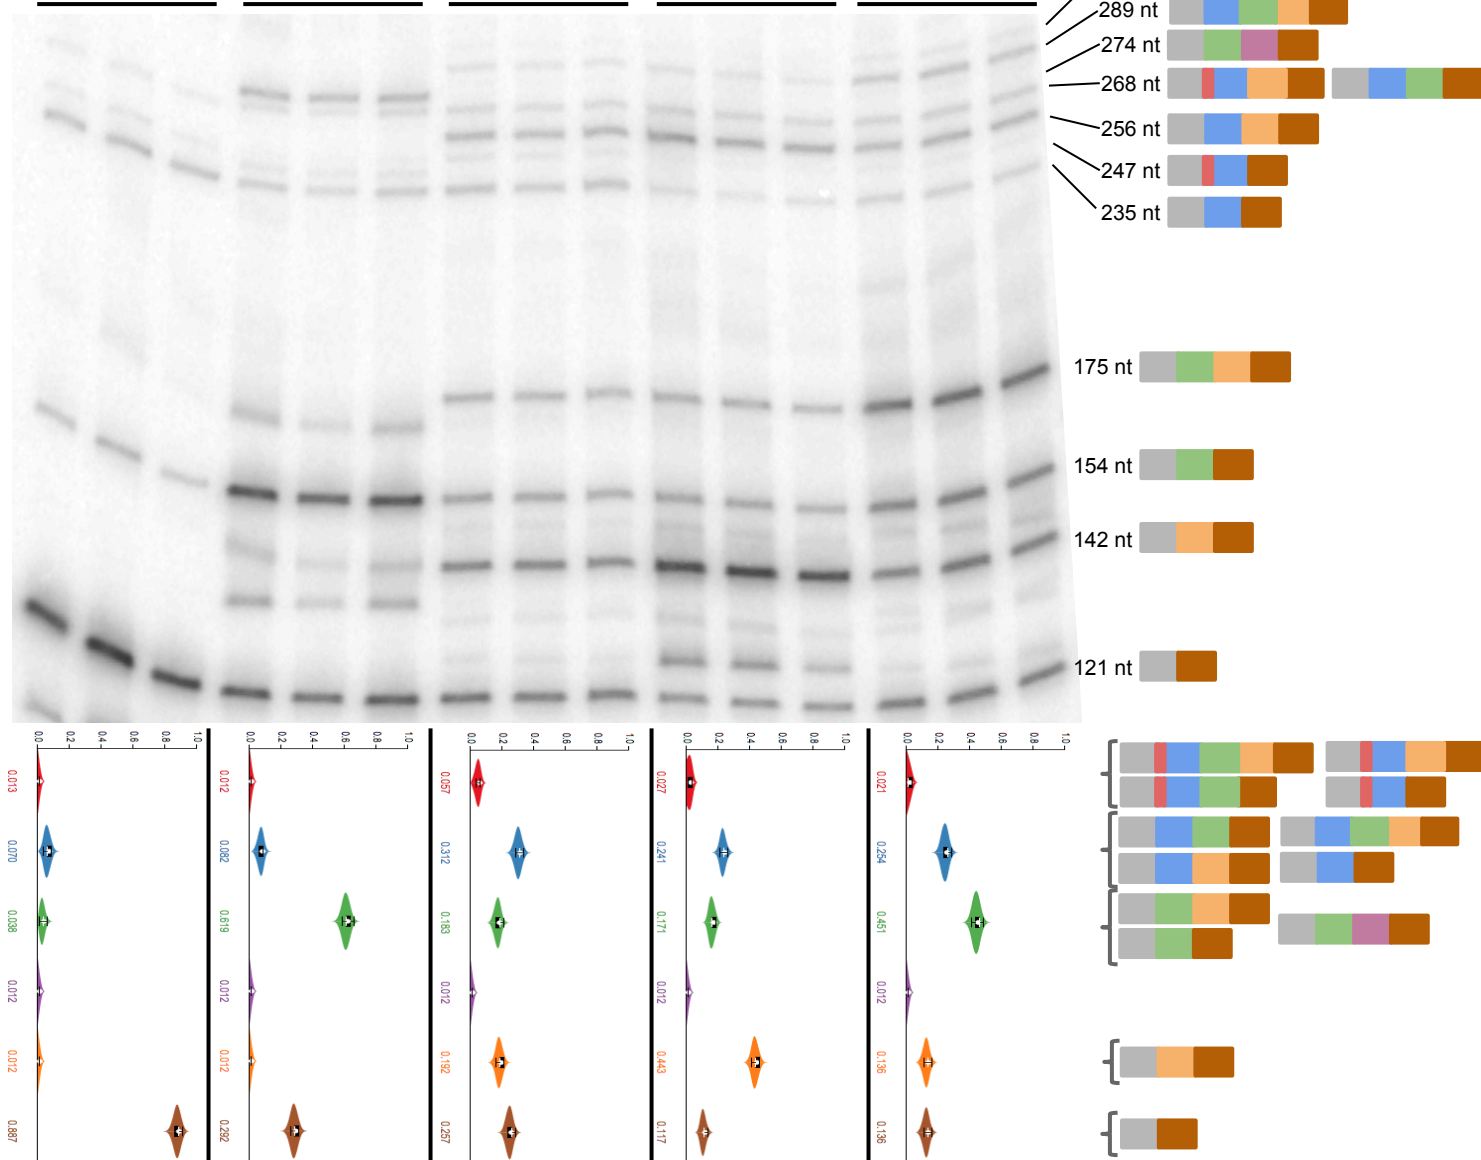

C

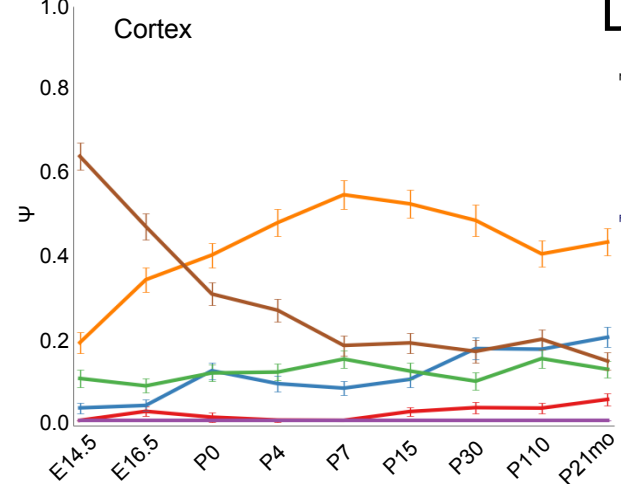

D

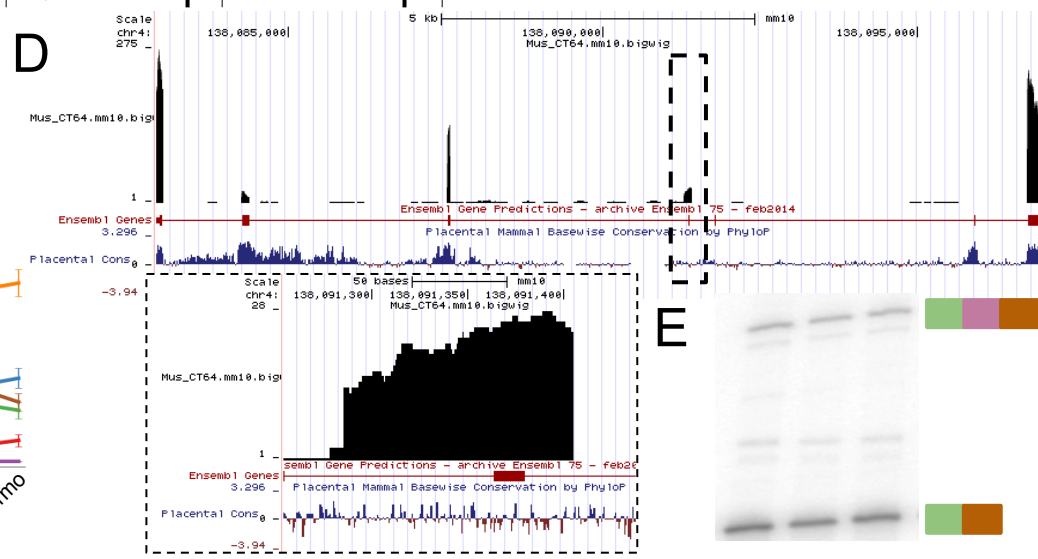

E

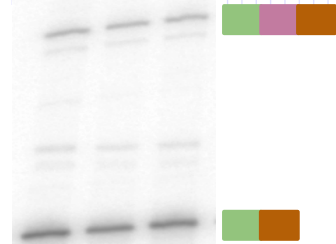

Supplement: supp [file elife-11752-supp-v1.zip]

A

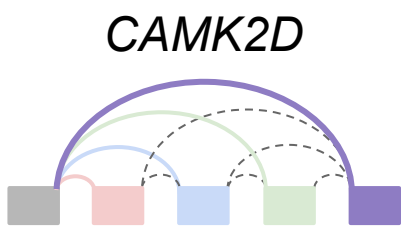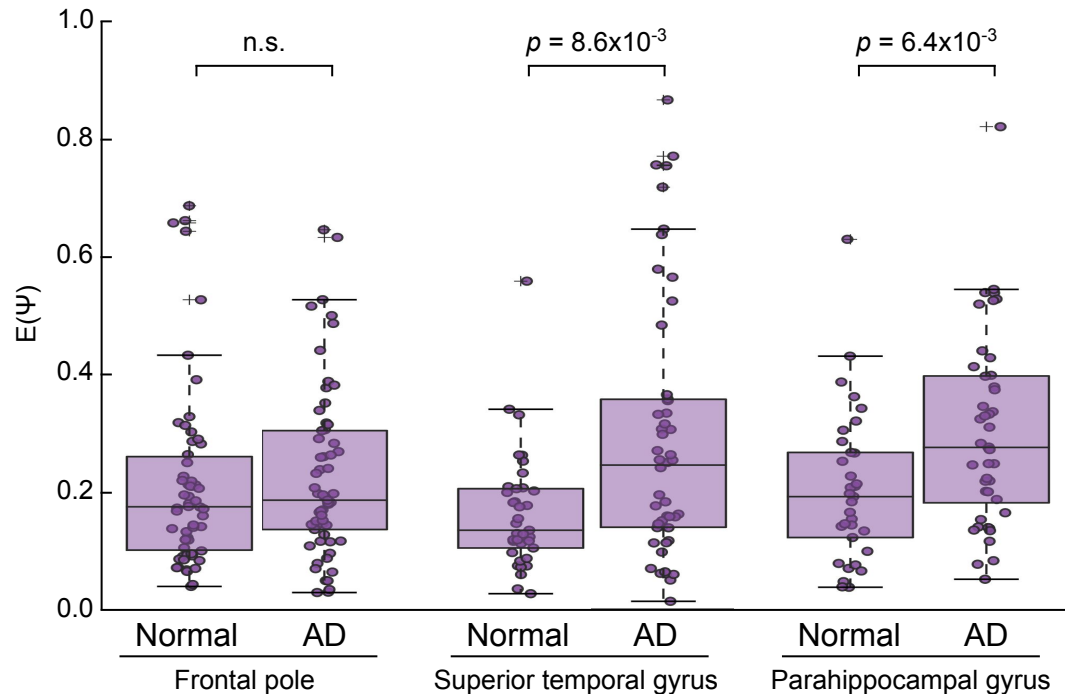

B

*CAMK2G*

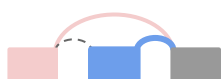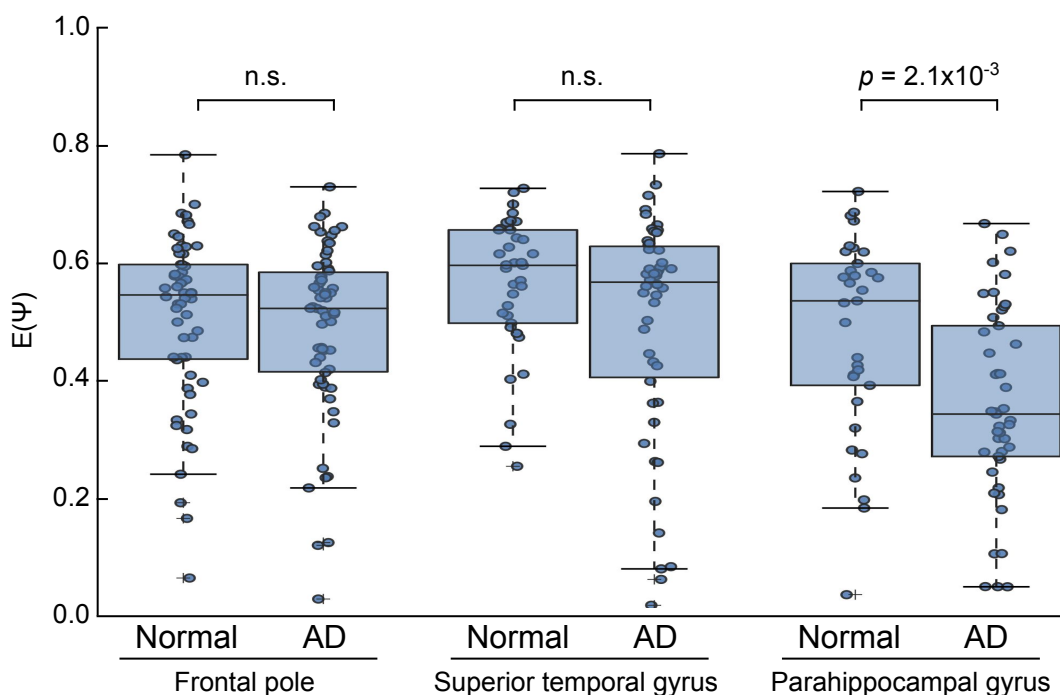

C

*CLTA*

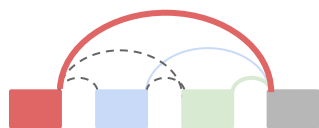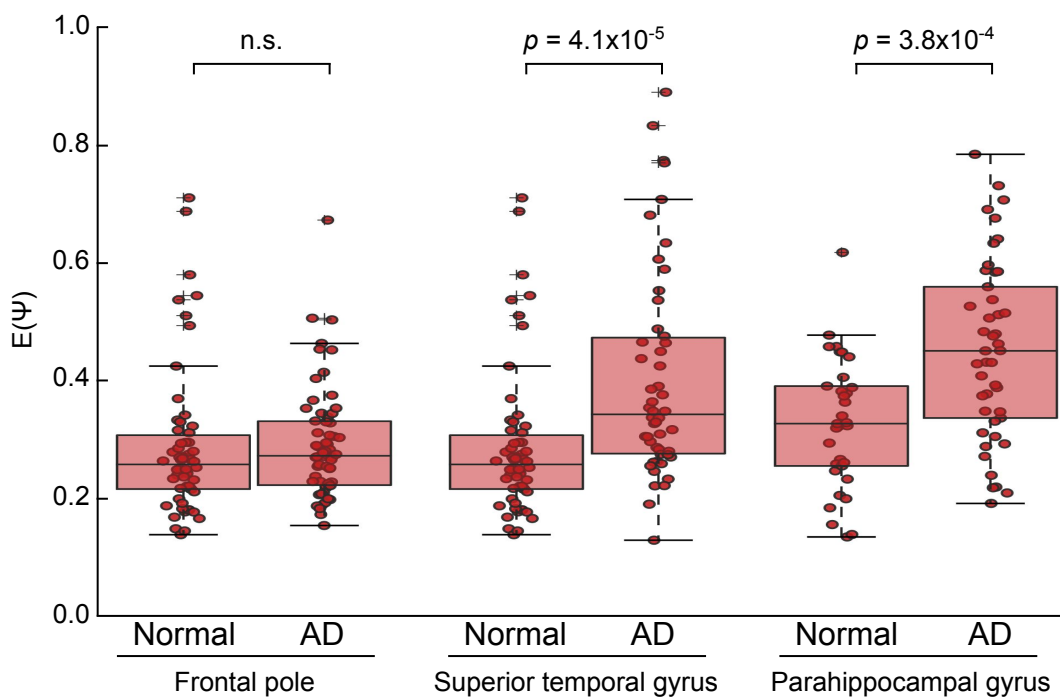

Supplement: supp [file elife-11752-supp-v1.zip]

A

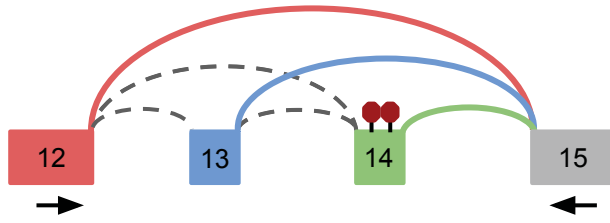

B

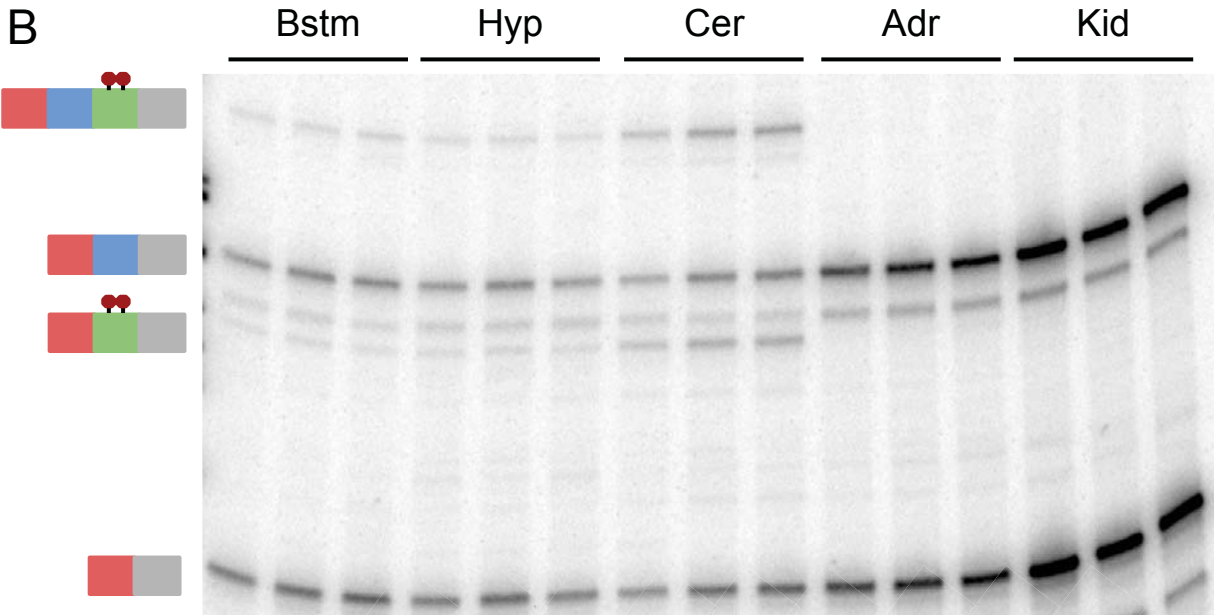

C

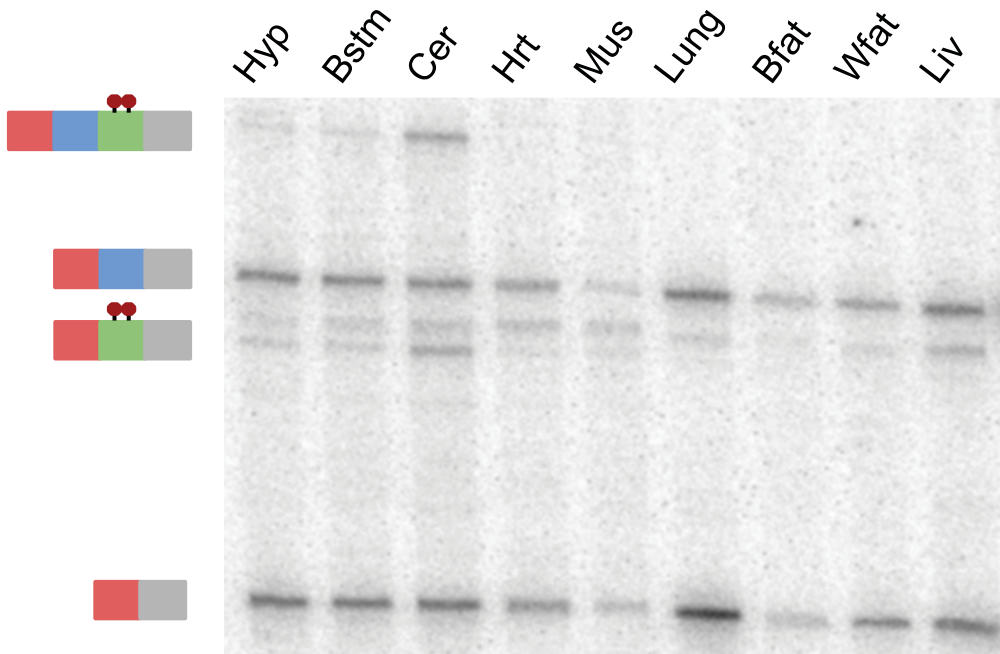

Supplement: supp [file elife-11752-supp-v1.zip]

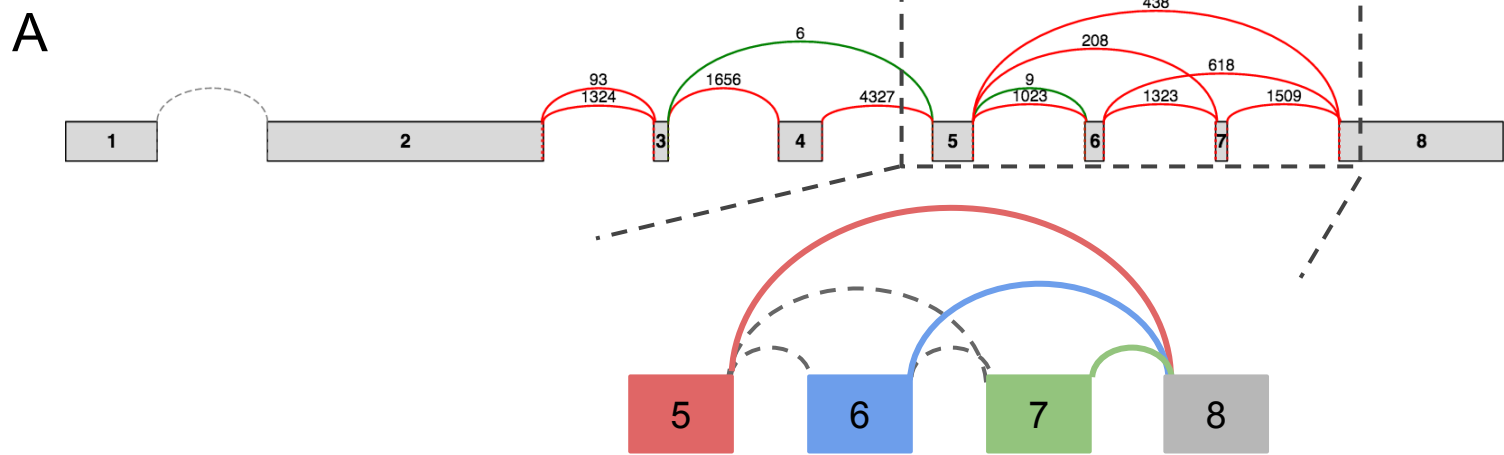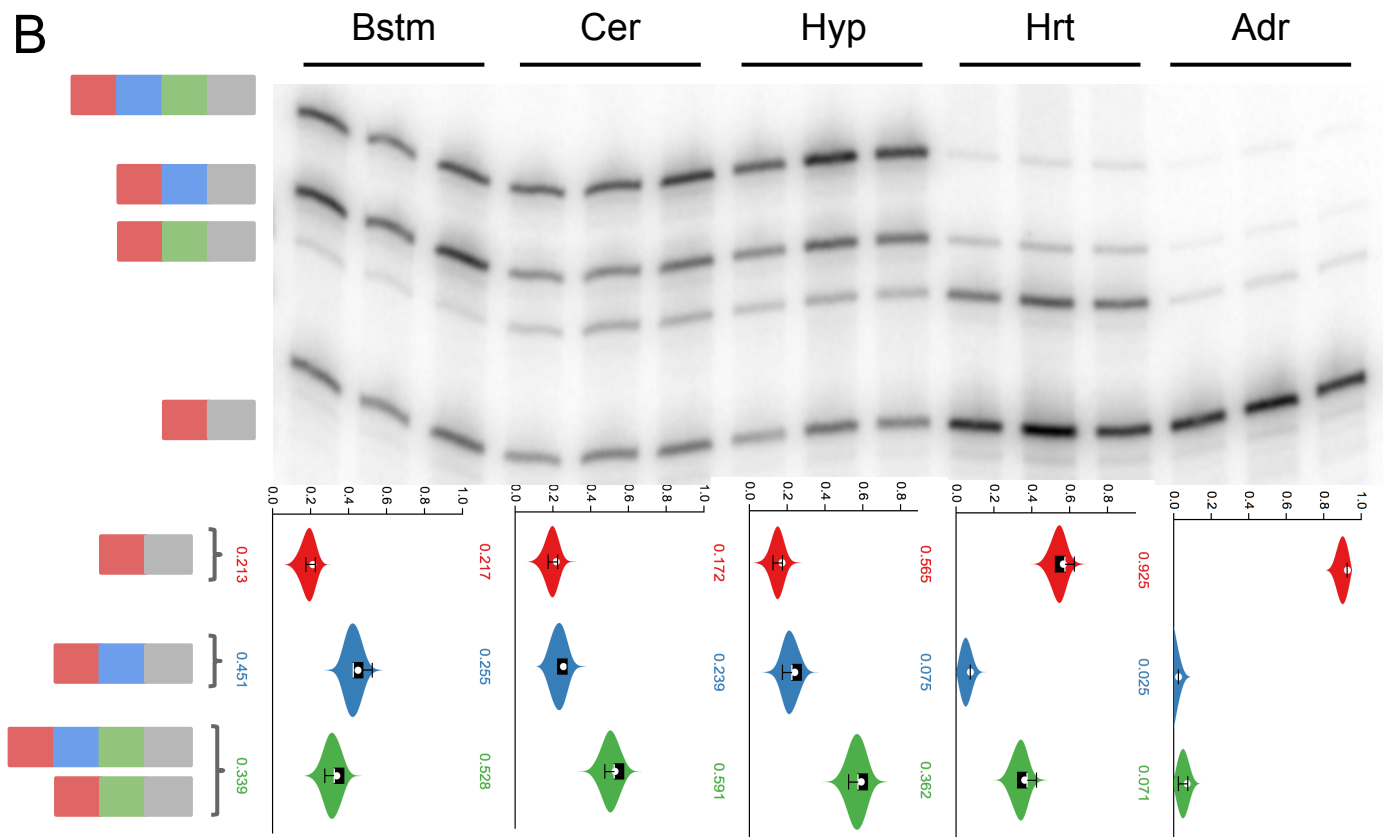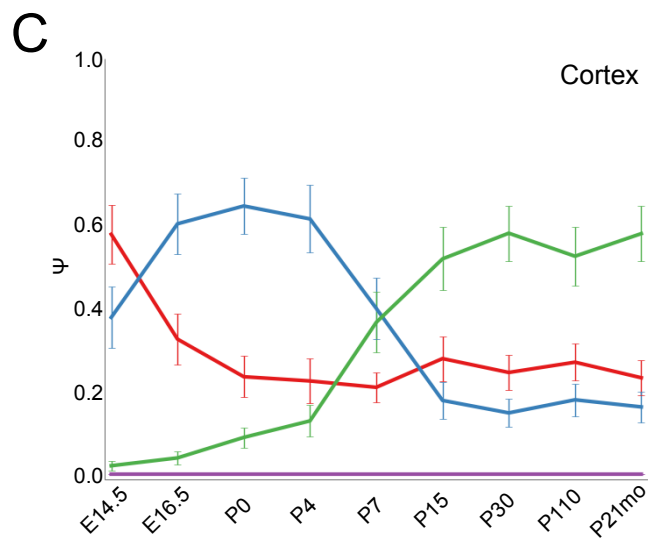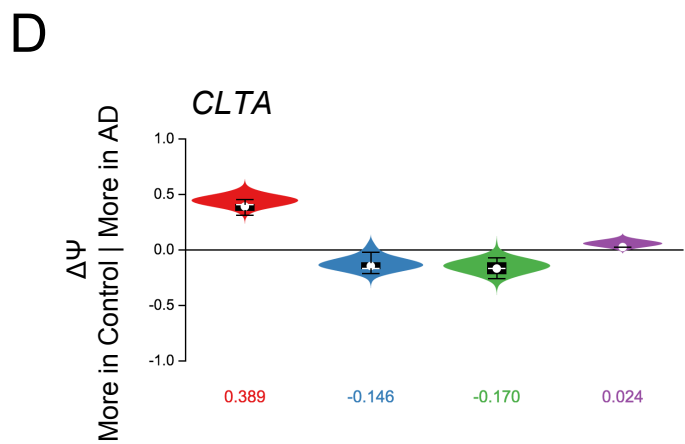

Supplement: supp [file elife-11752-supp-v1.zip]

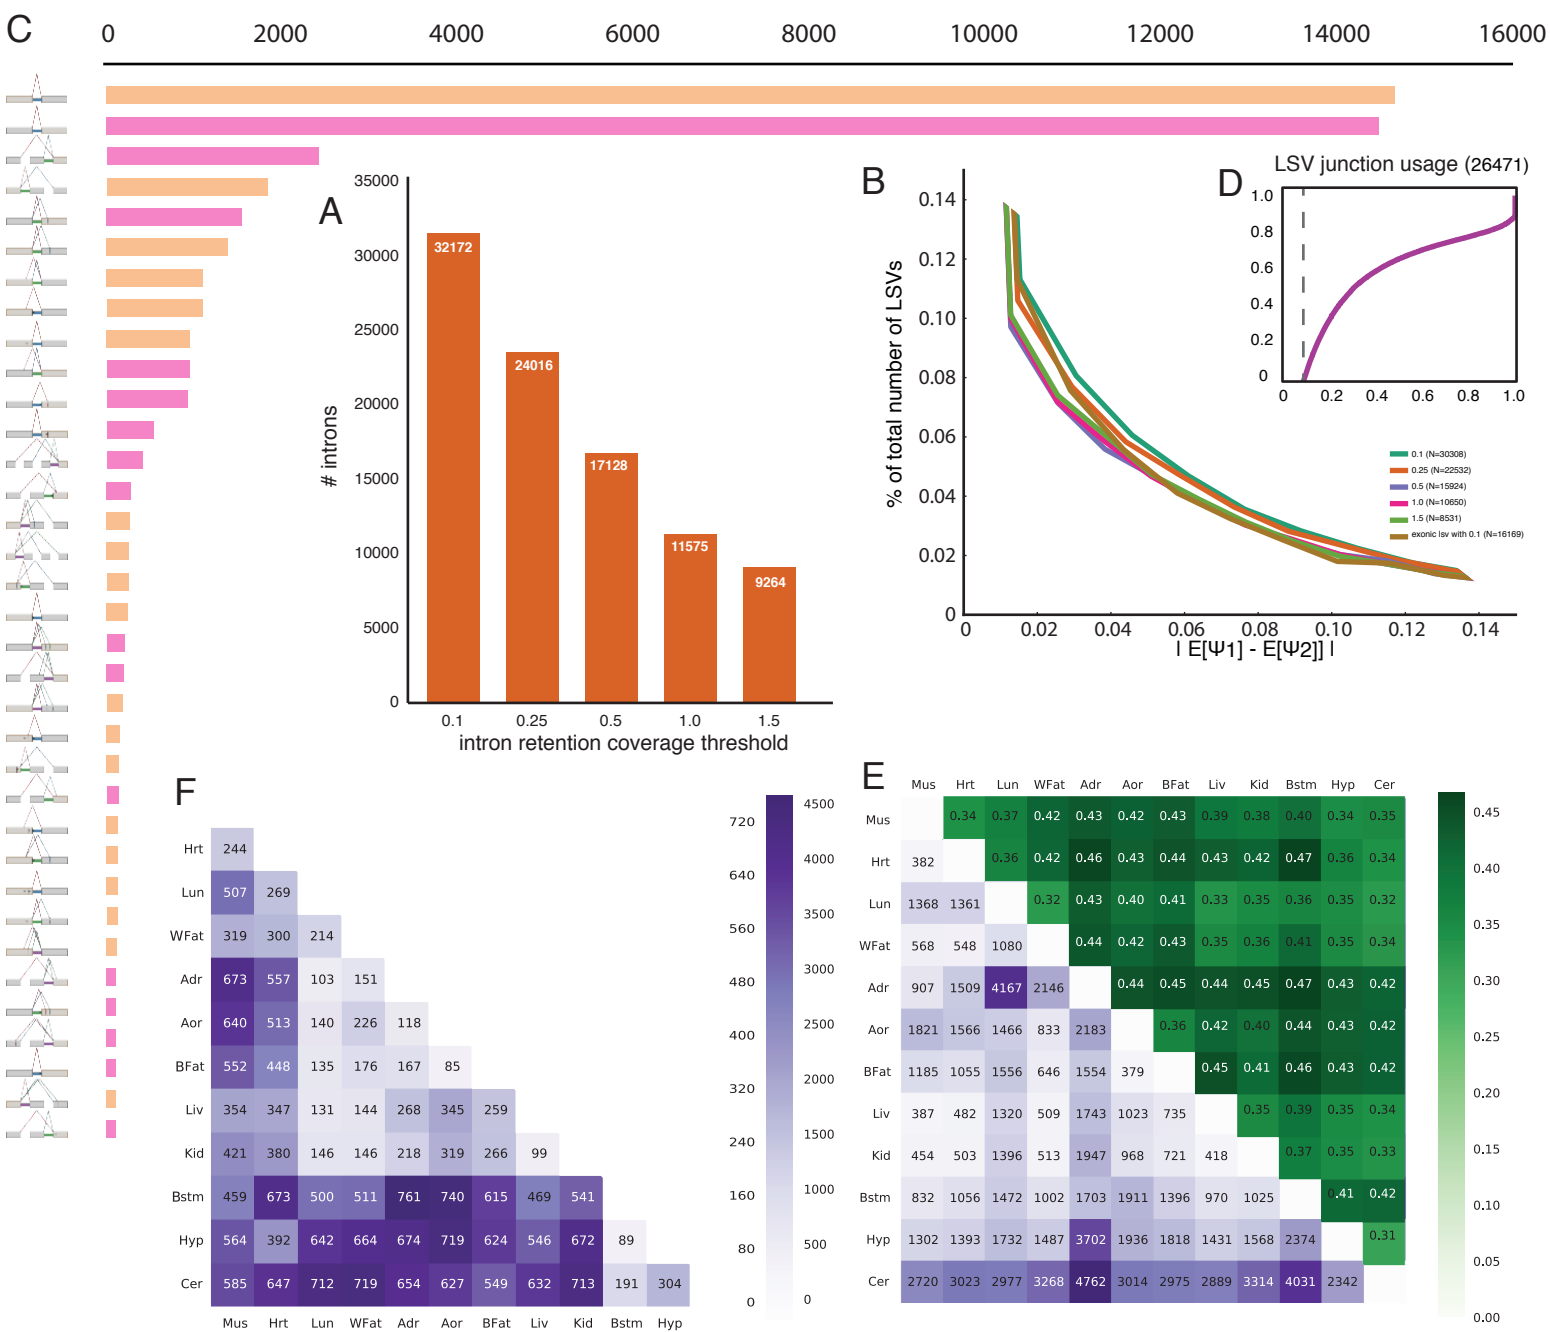

Supplement: supp [file elife-11752-supp-v1.zip]
